# Supplementary material for: National patient groups in Canada and their disclosure of relationships with pharmaceutical companies: a cross-sectional study
Source: PubMed Central journal article supplement — BMJ Open. 2022 Mar 8;12(3):e055287. doi: 10.1136/bmjopen-2021-055287 (PMC8915328; doi:10.1136/bmjopen-2021-055287), 2022-03-08
Supplement: bmjopen-2021-055287.draft_revisions.pdf [file bmjopen-2021-055287.draft_revisions.pdf]

# BMJ Open

BMJ Open is committed to open peer review. As part of this commitment we make the peer review history of every article we publish publicly available.

When an article is published we post the peer reviewers' comments and the authors' responses online. We also post the versions of the paper that were used during peer review. These are the versions that the peer review comments apply to.

The versions of the paper that follow are the versions that were submitted during the peer review process. They are not the versions of record or the final published versions. They should not be cited or distributed as the published version of this manuscript.

BMJ Open is an open access journal and the full, final, typeset and author-corrected version of record of the manuscript is available on our site with no access controls, subscription charges or pay-per-view fees (<http://bmjopen.bmj.com>).

If you have any questions on BMJ Open's open peer review process please email [info.bmjopen@bmj.com](mailto:info.bmjopen@bmj.com)

# BMJ Open

## Disclosure of relationships between Canadian patient groups and pharmaceutical companies: an observational study

|                               |                                                                                                                                                                                                                                                                                                                                                                                                                                                   |
|-------------------------------|---------------------------------------------------------------------------------------------------------------------------------------------------------------------------------------------------------------------------------------------------------------------------------------------------------------------------------------------------------------------------------------------------------------------------------------------------|
| Journal:                      | <i>BMJ Open</i>                                                                                                                                                                                                                                                                                                                                                                                                                                   |
| Manuscript ID                 | bmjopen-2021-055287                                                                                                                                                                                                                                                                                                                                                                                                                               |
| Article Type:                 | Original research                                                                                                                                                                                                                                                                                                                                                                                                                                 |
| Date Submitted by the Author: | 08-Jul-2021                                                                                                                                                                                                                                                                                                                                                                                                                                       |
| Complete List of Authors:     | Lexchin, Joel; York University Faculty of Health, School of Health Policy and Management; University of Toronto Faculty of Medicine, Department of Family and Community Health<br>Batt, Sharon; Dalhousie University, Halifax, Bioethics<br>Goldberg, Devorah; York University Faculty of Graduate Studies, School of Health Policy and Management<br>Shnier, Adrienne; York University Faculty of Health, School of Health Policy and Management |
| Keywords:                     | Health policy < HEALTH SERVICES ADMINISTRATION & MANAGEMENT, MEDICAL ETHICS, Health economics < HEALTH SERVICES ADMINISTRATION & MANAGEMENT                                                                                                                                                                                                                                                                                                       |
|                               |                                                                                                                                                                                                                                                                                                                                                                                                                                                   |

SCHOLARONE™  
Manuscripts

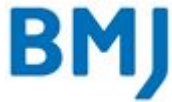

I, the Submitting Author has the right to grant and does grant on behalf of all authors of the Work (as defined in the below author licence), an exclusive licence and/or a non-exclusive licence for contributions from authors who are: i) UK Crown employees; ii) where BMJ has agreed a CC-BY licence shall apply, and/or iii) in accordance with the terms applicable for US Federal Government officers or employees acting as part of their official duties; on a worldwide, perpetual, irrevocable, royalty-free basis to BMJ Publishing Group Ltd ("BMJ") its licensees and where the relevant Journal is co-owned by BMJ to the co-owners of the Journal, to publish the Work in this journal and any other BMJ products and to exploit all rights, as set out in our [licence](#).

The Submitting Author accepts and understands that any supply made under these terms is made by BMJ to the Submitting Author unless you are acting as an employee on behalf of your employer or a postgraduate student of an affiliated institution which is paying any applicable article publishing charge ("APC") for Open Access articles. Where the Submitting Author wishes to make the Work available on an Open Access basis (and intends to pay the relevant APC), the terms of reuse of such Open Access shall be governed by a Creative Commons licence – details of these licences and which [Creative Commons](#) licence will apply to this Work are set out in our licence referred to above.

Other than as permitted in any relevant BMJ Author's Self Archiving Policies, I confirm this Work has not been accepted for publication elsewhere, is not being considered for publication elsewhere and does not duplicate material already published. I confirm all authors consent to publication of this Work and authorise the granting of this licence.

1  
2  
3 **Disclosure of relationships between Canadian patient groups and pharmaceutical**  
4 **companies: an observational study**  
5

6 Joel Lexchin (0000-0001-5120-8029), Sharon Batt (0000-0003-0612-0513), Devorah  
7 Goldberg, Adrienne Shnier  
8  
9

10 Joel Lexchin, professor emeritus, Faculty of Health (School of Health Policy and  
11 Management, York University), 4700 Keele St., Toronto, ON, Canada M3J 1P3  
12

13 Sharon Batt, adjunct professor, Department of Bioethics, Dalhousie University, 5849  
14 University Ave, Room C315, PO Box 15000, Halifax, NS, Canada B3H 4R2  
15  
16

17 Devorah Goldberg, graduate student, Faculty of Graduate Studies (Graduate Program in  
18 Health), York University, 4700 Keele St., Toronto, ON, Canada M3J 1P3  
19

20 Adrienne Shnier, adjunct professor, Faculty of Health (School of Health Policy and  
21 Management, York University), 4700 Keele St., Toronto, ON, Canada M3J 1P3  
22  
23

24 **Correspondence:**  
25

26 Dr. Joel Lexchin  
27 School of Health Policy and Management  
28 York University  
29 4700 Keele St.  
30 Toronto, ON, Canada M3J 1P3  
31 Tel: +416-209-4885  
32 Email: jlexchin@yorku.ca  
33  
34  
35  
36  
37  
38  
39  
40  
41  
42  
43  
44  
45  
46  
47  
48  
49  
50  
51  
52  
53  
54  
55  
56  
57  
58  
59  
60

## Structured Summary

### Objectives

This study investigates the information and policies that Canadian patient groups post on their publicly available websites about their relationships with pharmaceutical companies.

### Design

Observational study.

### Setting

Canadian patient groups.

### Participants

Ninety-seven national patient groups with publicly available websites.

### Interventions

Collection of information about: total annual revenue for the latest fiscal year, year revenue was reported, revenue from pharmaceutical company donors, purpose of the donation, presence of donors' logos on the website and hyperlinks to donors' websites, previous and current employment information about board members and staff, external audits about the group's finances, and whether the group endorses products made by donors. Analysis of publicly available policies looking at: board and/or advisory board, acceptance of donations and revenue generation, independence of decision-making, endorsements, assistance to and/or interactions between patient members from a donor or another company/person acting on behalf of a donor and audits/monitoring/compliance.

### Primary and secondary outcome measures

Number of patient groups posting different types of information on their websites and having policies covering different topics about relationships.

### Results

1  
2  
3 Fifty-three (54.6%) of 97 groups reported donations from pharmaceutical companies but only  
4  
5 1 (1.0%) gave the total amount. Thirty-seven (38.1%) groups showed the logos of  
6  
7 pharmaceutical companies on their websites and 20 (54.1%) had hyperlinks to  
8  
9 pharmaceutical company websites. Twenty-five (25.8%) groups endorsed pharmaceutical  
10  
11 products produced by brand-name companies that had donated to the groups. Twenty-six  
12  
13 (26.8%) groups had policies that dealt with relations with pharmaceutical companies. The  
14  
15 topic that was most frequently mentioned was acceptance of donations and revenue  
16  
17 generation (16 (16.5%) groups).  
18  
19  
20  
21

## 22 **Conclusions**

23  
24 Pharmaceutical industry funding of the included patient groups was frequent. Despite this,  
25  
26 relatively little information was provided on patient group websites about their relationships  
27  
28 with pharmaceutical companies. Only 26 out of 97 groups had policies that directly dealt with  
29  
30 their relationships with pharmaceutical companies.  
31  
32  
33  
34  
35  
36  
37  
38  
39  
40  
41  
42  
43  
44  
45  
46  
47  
48  
49  
50  
51  
52  
53  
54  
55  
56  
57  
58  
59  
60

## Article Summary

### *Strengths and limitations of this study*

- This is the first Canadian study to examine patient groups relationships with pharmaceutical companies.
- Information posted on groups' websites and policies guiding the relationships were analyzed.
- Ninety-seven national groups were included.
- Information was presented in multiple different places on groups' websites and some relevant information may have been overlooked.
- Results may not be representative of other Canadian patient groups.

## Introduction

Patient groups serve an important function within the healthcare system for their members with a specific condition, providing information, education and support, contact with others facing the same health condition and assistance in navigating the health care system. Within this mandate, they often lobby Health Canada, the federal drug regulator, to approve new drugs and provincial governments for specific products to be funded for their membership. They advocate for more research into conditions afflicting their populations, sit on important policy committees and speak for patients with healthcare professionals and healthcare institutions such as hospitals. Patient group leaders often act as the voice of patients in the media.<sup>1 2</sup>

Since the Canadian federal government rolled back funding of patient groups in the mid 1990s<sup>3</sup> groups have sought new sources of revenue. Many patient groups receive money from pharmaceutical companies. This source of revenue has created concerns about a conflict of interest (COI) between corporate sponsors with a vested interest in supporting product sales and the patient groups and the potential for groups to adopt positions that favour their funders. Some groups have lobbied provincial governments to have their sponsors' drugs included on provincial formularies.<sup>4 5</sup> Ninety-three patient groups made 372 submissions to either the Common Drug Review or the pan-Canadian Oncology Drug Review, both part of the Canadian Agency for Drugs and Technology in Health (CADTH), about whether these agencies should recommend that provincial drug plans fund medications. When groups had a conflict with the company making the drug, they were in favour of funding in 193 (85.0%) out of 227 submissions, neutral in 30 (13.2%) submissions and opposed in 4 (1.8%).<sup>6</sup>



1  
2  
3 The actions by groups described above highlight the need to systematically investigate how  
4 patient groups report financial information on their publicly available websites, for example,  
5 whether they report receiving donations from pharmaceutical companies, and whether they  
6 have policies to guide their relationships with their pharmaceutical company donors.  
7  
8  
9  
10  
11  
12 Transparency in reporting is a first step to enabling all affected parties (patient group  
13 members, the medical community, governments, policy makers and funders) to assess the  
14 independence of groups from these funding sources. This study investigated the transparency  
15 of patient groups about these funding links. We assessed key information about the  
16 organization: how much financial information patient groups post on their websites –  
17 specifically, information about donations and the use of donations, the composition and  
18 employment histories of their boards and staff. Equally important, we examine whether the  
19 groups have COI policies to guide their interactions with companies.  
20  
21  
22  
23  
24  
25  
26  
27  
28  
29  
30  
31  
32

## 33 **Methods**

### 34 *List of patient groups*

35  
36  
37 In the absence of a single national list of Canadian patient groups, on April 22-23, 2019 we  
38 searched the websites of all provincial and territorial drug plans to see if they had a list of  
39 patient groups that provided input to their decision-making processes. Only Ontario and  
40 British Columbia (BC) had such lists: BC Pharmacare registers groups that may provide  
41 public input into its drug coverage review process (121 groups) <sup>7</sup> and the Ontario Ministry of  
42 Health and Long-Term Care registers advocacy groups eligible to provide patient evidence  
43 submissions on drugs listed on the drug review schedule of the Ontario Public Drug Program  
44 (102 groups).<sup>8</sup> Additional sources for patient groups were those registered with the pan-  
45 Canadian Oncology Drug Review, (44 groups) <sup>9</sup> and the membership of the Best Medicines  
46  
47  
48  
49  
50  
51  
52  
53  
54  
55  
56  
57  
58  
59  
60

1  
2  
3 Coalition, an alliance of patient advocates with a shared goal of gaining access to “safe and  
4 effective medicines that improve patient outcomes” (27 groups).<sup>10</sup>  
5  
6  
7  
8  
9

10 We removed duplicates from our list and limited the groups to those that met the following  
11 criteria: Canadian, national in nature, self-identified as patient groups and had an active  
12 website that we could search for information.  
13  
14  
15  
16

### 17 18 19 *Contacting patient groups*

20 In addition to gathering information on patient groups’ websites, we contacted each patient  
21 group’s communication contact or equivalent by email in the week of July 13, 2020 to ensure  
22 that our data collection would not miss any publicly available, relevant documents.  
23  
24  
25  
26

27 (Supplementary File 1 provides a generic version of the email which was modified for each  
28 individual group.) The nature of the study was explained including that we were collecting  
29 only publicly available information, that while groups would be identified no individuals in  
30 those groups would be named and that all the information we collected would be placed in a  
31 publicly available website. In the email, we asked for documents that would help us  
32 determine how transparent groups are with respect to their relationship with donors: 1) the  
33 organization’s criteria for accepting funding; 2) the organization’s position on how funds  
34 from acceptable sources are used; 3) the organization’s financial affiliations and donors, the  
35 sum per annum that the organization receives from those donors; and 4) the organization’s  
36 board membership including the names of the board members, employment information, and  
37 whether there are any current or former pharmaceutical industry employees on the board.  
38 (Revenue Canada does not require registered charitable organizations to submit audited  
39 financial statements, but organizations need to file annual reports that include basic financial  
40 information along with a list of directors. These statements do not include the names of  
41  
42  
43  
44  
45  
46  
47  
48  
49  
50  
51  
52  
53  
54  
55  
56  
57  
58  
59  
60

1  
2  
3 individual donors and the amount that they donated nor any background information about  
4 the directors.) If no response was received, a reminder email was sent out after 7 weeks. Any  
5 documents received were stored in a password protected web-based site.  
6  
7  
8  
9  
10

### 11 *Construction of data extraction form*

12  
13  
14 We initially carried out a focused literature search to identify research on patient group  
15 relationships with industry and COI disclosure and developed a preliminary data collection  
16 tool.<sup>11-16</sup> This preliminary tool was then sent to 5 experts in the area (LB, AFB, QG, BJM,  
17 LP) and modified based on their comments. The resulting tool was then pilot tested by two  
18 authors (JL and AS) who independently abstracted information from 5 Australian patient  
19 groups. Results were compared and the tool was modified based on this pilot test. It was then  
20 converted into REDCap, a data management tool. The same two authors carried out a second  
21 pilot test, using 5 Canadian patient groups and modified the tool one final time.  
22  
23  
24  
25  
26  
27  
28  
29  
30  
31  
32  
33  
34

### 35 *Data extraction*

36  
37 Using the final version of our REDCap tool, between September 2020 and April 2021 we  
38 extracted the following information, if it was available, from the group's website: total annual  
39 revenue for the latest fiscal year, year revenue was reported, revenue from pharmaceutical  
40 company donors, purpose of the donation, presence of donors' logos on the website and  
41 hyperlinks to donors' websites, previous and current employment information about board  
42 members and staff, external audits about the group's finances, and whether the group  
43 endorses products made by donors (Supplementary File 2).  
44  
45  
46  
47  
48  
49  
50  
51  
52  
53  
54  
55

56 We also examined websites for the presence of COI policies, codes and guidelines  
57 (collectively referred to as policies) that covered one or more of the following a priori defined  
58  
59  
60

1  
2  
3 content areas: board and/or advisory board, acceptance of donations and revenue generation,  
4  
5 independence of decision-making, endorsements, assistance to and/or interactions between  
6  
7 patient members from a donor or another company/person acting on behalf of a donor and  
8  
9 audits/monitoring/compliance. Any policy potentially related to relationships with industry  
10  
11 donors was collected and assessed for relevancy; only those covering one or more of the  
12  
13 issues listed above were included in the analysis. If a policy was available, we recorded  
14  
15 whether specific information was present or absent, however, we did not evaluate the strength  
16  
17 of the policy (Supplementary File 3). In order to be eligible, the document had to be  
18  
19 explicitly identified as a policy. By-laws and legal documents were excluded.  
20  
21  
22  
23  
24  
25

26 All four authors independently extracted information from the websites of 23-24 different  
27  
28 patient groups and each author did a secondary review of 5 additional websites. Groups of  
29  
30 two authors compared their evaluations for these 5 to ensure uniform extraction and then  
31  
32 compared information in extraction forms for 1 out of every 5 of the remaining groups.  
33  
34

35 Differences were resolved by consensus and if consensus could not be reached a third author  
36  
37 made the final decision.  
38  
39  
40  
41

42 Best Medicines Coalition (BMC) has a Code of Conduct Regarding Funding <sup>17</sup> that applies to  
43  
44 all its member groups. We considered the code applicable to a group if it was posted on the  
45  
46 group's website or if the website had a hyperlink to the code. Similarly, if groups hyperlinked  
47  
48 to other codes or policies, such as the Canadian Consensus Framework for Ethical  
49  
50 Collaboration <sup>18</sup> we also considered those codes or policies as applicable to the group. If a  
51  
52 group indicated on its website that a code or policy was available on request, but the policy  
53  
54 was unavailable otherwise, we did not include it.  
55  
56  
57  
58  
59  
60

### *Data analysis*

We only report descriptive data in the form of the number and percent of groups with the different types of information on their websites and with policies covering the different aspects of relationships with pharmaceutical companies. For the purpose of reporting our results, groups were anonymized but the names of the groups, not linked to their responses, are available in Supplementary File 4.

### *Ethics statement*

The Human Participants Review Committee of the York University Office of Research Ethics assessed our ethics application and replied that an approval certificate was not required as this research was not subject to review.

### *Patient and public involvement*

Patient groups were contacted for information about their relationships with pharmaceutical companies. There was no other patient or public involvement in this study.

## **Results**

We initially identified 100 different groups that met our inclusion criteria and contacted all 100 by email, but during the course of the study two groups merged and the websites of two other groups disappeared leaving a sample of 97 groups (Figure 1) (Supplementary File 4). Eight groups provided policies in response to our request, all of which were publicly available on their websites except one that was publicly available on request from the group. Fifteen groups responded but did not provide policies, an additional 14 groups specifically stated that they did not want to be involved in the project and 60 groups did not reply.

1  
2  
3  
4  
5  
6 Between the material that patient groups sent us directly and those we sourced from the  
7  
8 groups' websites, we collected 846 pieces of material (financial statements, documents,  
9  
10 policies, codes, reports) for analysis, with a median of 6.0 pieces per group (interquartile  
11  
12 (IQR) range 2.5, 10.5) (Supplementary File 4).  
13  
14  
15  
16

### 17 *Information on patient group websites*

18  
19 Fifty-three (54.6%) of 97 groups reported donations from pharmaceutical companies but only  
20  
21 1 (1.0%) gave the total amount - \$516,000 (1.0%) out of total revenue of \$54.1 million that it  
22  
23 received from pharmaceutical companies. None of the other groups reported the percent of its  
24  
25 total revenue from companies. None of the other groups reported the percent of its  
26  
27 total revenue from companies. Nine (9.3%) groups gave dollar ranges for donations, 17  
28  
29 (17.5%) gave the total value of donations from all sources but none gave the exact amount of  
30  
31 any single donation and 8 (8.2%) broke donations down into separate categories (for  
32  
33 example, corporate, foundations, individuals). Four (4.2%) disclosed the purpose of  
34  
35 donations.  
36  
37  
38  
39

40 Forty-eight (49.5%) groups displayed the logos of their donors on the groups' websites,  
41  
42 including 37 (38.1%) that showed the logos of pharmaceutical companies. Thirty-one (64.6%  
43  
44 of those displaying logos) provided a hyperlink to their donors' websites (Table 1), including  
45  
46 20 (54.1%) groups that had hyperlinks to pharmaceutical company websites. Sixty-seven  
47  
48 (69.1%) of groups did not endorse any products, while 30 (30.9%) endorsed specific products  
49  
50 made by their donors, for example by expressing approval for their funding or availability,  
51  
52 including 25 (25.8%) groups that endorsed pharmaceutical products produced by brand-name  
53  
54 companies that had donated to the groups.  
55  
56  
57  
58  
59  
60

**Table 1: Number of patient groups (percent) reporting information about revenue and donations**

| Total annual revenue | Donations in general                 |                          |                                                                       |                      | Pharmaceutical company donations     |                                                  |                                                                 | Donor information on website |                              |                            |                              |
|----------------------|--------------------------------------|--------------------------|-----------------------------------------------------------------------|----------------------|--------------------------------------|--------------------------------------------------|-----------------------------------------------------------------|------------------------------|------------------------------|----------------------------|------------------------------|
|                      | Dollar range of individual donations | Total value of donations | Breakdown of total donations by source (e.g., corporate, individuals) | Purpose of donations | Number of groups reporting donations | Value of donations from pharmaceutical companies | Percent of total revenue from pharmaceutical company donations* | Donor logo                   |                              | Hyperlink to donor website |                              |
| 42 (43.3)            | 9 (9.3)                              | 17 (17.5)                | 8 (8.2)                                                               | 4 (4.2)              | 53 (54.6)                            | 1 (1.0)                                          | 1 (1.0)                                                         | Any donor                    | Pharmaceutical company donor | Any donor                  | Pharmaceutical company donor |
|                      |                                      |                          |                                                                       |                      |                                      |                                                  |                                                                 | 48 (49.5)                    | 37 (38.1)                    | 31 (32.0)                  | 20 (20.6)                    |

\*Calculated from information on website

Fifty-three (54.6%) groups had a brief synopsis about their board members but only 6 (6.2%) had detailed past employment histories. Seventeen groups (17.5%) disclosed that board members had current or past employment with a pharmaceutical company. Four (4.1%) groups gave pharmaceutical industry employment histories about their staff (Table 2).

**Table 2: Number of patient groups (percent) reporting employment information about board members and staff**

| Board members              |                |           | Staff                                                |           |                                             |         |
|----------------------------|----------------|-----------|------------------------------------------------------|-----------|---------------------------------------------|---------|
| General employment history |                |           | Pharmaceutical industry employment history disclosed |           | Pharmaceutical employment history disclosed |         |
| None*                      | Brief synopsis | Detailed† | No                                                   | Yes       | No*                                         | Yes     |
| 38 (39.2)                  | 53 (54.6)      | 6 (6.2)   | 80 (82.5)                                            | 17 (17.5) | 93 (95.9)                                   | 4 (4.1) |

\*Board members (staff) not named or no information about employment history

†For example, year ranges with position, job title, employer



1  
2  
3 No groups had external (or internal) audited reports about their activities, for example,  
4  
5 whether they followed their policies or how their donations were used.  
6  
7  
8  
9

### 10 *Patient group policies*

11  
12 Twenty-six (26.8%) groups had policies that dealt with relations with pharmaceutical  
13  
14 companies (Table 3). None of the members of BMC referred to the BMC Code on their  
15  
16 website. There were policies on 7 separate topics related to patient group-company  
17  
18 relationships: composition and authority of the board, acceptance of donations and revenue  
19  
20 generation, independence of decision-making, endorsements, material assistance to patient  
21  
22 group members by a donor, other interactions between patient members of the group and a  
23  
24 donor, and independent monitoring of activities and compliance with policies. The topic that  
25  
26 was most frequently mentioned was acceptance of donations and revenue generation (16  
27  
28 (16.5%) groups) and the least covered topic was independent audits of finances, monitoring  
29  
30 of activities and compliance with policies audits (5 (5.2%) groups). The median number of  
31  
32 topics covered per group with policies was 4 (IQR 2, 6).  
33  
34  
35  
36  
37  
38  
39  
40  
41  
42  
43  
44  
45  
46  
47  
48  
49  
50  
51  
52  
53  
54  
55  
56  
57  
58  
59  
60

**Table 3: Topics related to relationships with pharmaceutical companies covered by patient group policies**

| Patient group number* | Topic of policy                    |                                                |                                 |              |                                                         |                                                                     |                                                                   |
|-----------------------|------------------------------------|------------------------------------------------|---------------------------------|--------------|---------------------------------------------------------|---------------------------------------------------------------------|-------------------------------------------------------------------|
|                       | Composition and authority of board | Acceptance of donations and revenue generation | Independence of decision-making | Endorsements | Material assistance to patient group members by a donor | Other interactions between patient members of the group and a donor | Independent monitoring of activities and compliance with policies |
| 1                     | X                                  | X                                              | X                               | X            | X                                                       |                                                                     |                                                                   |
| 2                     | X                                  | X                                              | X                               | X            | X                                                       | X                                                                   | X                                                                 |
| 3                     | X                                  | X                                              | X                               | X            | X                                                       |                                                                     |                                                                   |
| 4                     | X                                  | X                                              | X                               | X            | X                                                       | X                                                                   | X                                                                 |
| 5                     |                                    |                                                |                                 |              |                                                         |                                                                     |                                                                   |
| 6                     |                                    |                                                |                                 |              |                                                         |                                                                     |                                                                   |
| 7                     |                                    |                                                |                                 |              |                                                         |                                                                     |                                                                   |
| 8                     |                                    | X                                              |                                 | X            |                                                         | X                                                                   | X                                                                 |
| 9                     |                                    | X                                              | X                               | X            |                                                         |                                                                     |                                                                   |
| 10                    |                                    | X                                              | X                               | X            |                                                         |                                                                     |                                                                   |
| 11                    |                                    | X                                              | X                               | X            |                                                         |                                                                     |                                                                   |
| 12                    | X                                  | X                                              | X                               | X            | X                                                       |                                                                     |                                                                   |
| 13                    |                                    | X                                              | X                               | X            | X                                                       | X                                                                   |                                                                   |
| 14                    | X                                  | X                                              |                                 |              |                                                         |                                                                     |                                                                   |
| 15                    |                                    | X                                              | X                               | X            |                                                         |                                                                     |                                                                   |
| 16                    | X                                  | X                                              | X                               | X            |                                                         | X                                                                   |                                                                   |
| 17                    |                                    |                                                |                                 |              |                                                         |                                                                     |                                                                   |
| 18                    | X                                  | X                                              | X                               | X            | X                                                       | X                                                                   | X                                                                 |
| 19                    |                                    |                                                |                                 | X            |                                                         |                                                                     |                                                                   |
| 20                    |                                    |                                                |                                 |              |                                                         |                                                                     |                                                                   |

|              |    |    |    |    |   |   |   |
|--------------|----|----|----|----|---|---|---|
| <b>21</b>    | x  |    |    |    |   |   |   |
| <b>22</b>    | x  | x  |    |    | x |   |   |
| <b>23</b>    |    |    | x  |    |   |   |   |
| <b>24</b>    |    |    |    |    |   | x |   |
| <b>25</b>    |    | x  |    | x  |   |   | x |
| <b>26</b>    | x  |    |    |    |   |   |   |
| <b>Total</b> | 11 | 16 | 13 | 15 | 8 | 7 | 5 |

\*Patient groups have been anonymized

For peer review only

1  
2  
3  
4  
5  
6  
7  
8  
9  
10  
11  
12  
13  
14  
15  
16  
17  
18  
19  
20  
21  
22  
23  
24  
25  
26  
27  
28  
29  
30  
31  
32  
33  
34  
35  
36  
37  
38  
39  
40  
41  
42  
43  
44  
45  
46

Table 4 provides details about how many groups regulated individual aspects of each of the 7 topics referred to above. Neither of the three groups that have policies covering employment of board members required their current or previous employment to be made public on the group's website. One group prohibited people who currently or previously worked for any donor from being on the board, while 2 allowed this.

**Table 4: Number of patient groups with policies covering different topics of relationships with pharmaceutical companies**

| Particular topic of relationship covered by policy                                                                                                                                      | Number of groups with policy |
|-----------------------------------------------------------------------------------------------------------------------------------------------------------------------------------------|------------------------------|
| <b><i>Composition and authority of board</i></b>                                                                                                                                        |                              |
| Current or previous employment of board members should be made public                                                                                                                   | 0                            |
| Board membership allowed for people who currently or previously worked for a donor                                                                                                      | 3 (1 no, 2 yes)              |
| <b><i>Acceptance of donations and revenue generation</i></b>                                                                                                                            |                              |
| Source of donations should be made public                                                                                                                                               | 6 (yes)                      |
| Amount of donations should be made public                                                                                                                                               | 0                            |
| Purpose of donations should be made public                                                                                                                                              | 0                            |
| Donations can be tied to donor-initiated project                                                                                                                                        | 10 (5 yes, 5 no)             |
| Donations require approval by board or executive director                                                                                                                               | 11 (5 yes, 6 no)             |
| <b><i>Independence of decision-making</i></b>                                                                                                                                           |                              |
| Group has total independence in decision-making                                                                                                                                         | 13 (yes)                     |
| Donors allowed to directly organize seminars, lectures, projects or meetings                                                                                                            | 2 (1 yes, 1 no)              |
| <b><i>Endorsements</i></b>                                                                                                                                                              |                              |
| Names of donors and/or their logos can be displayed on group's website except to identify donor and amount of money donated                                                             | 8 (4 yes, 4 no)              |
| Endorsements of products and/or companies allowed                                                                                                                                       | 14 (3 yes, 11 no)            |
| Hyperlinks to donors' websites allowed                                                                                                                                                  | 4 (yes)                      |
| Patient group can directly or indirectly cooperate with companies in lobbying, testifying, addressing legislators, regulators, or policymakers, writing articles or policy briefs, etc. | 7 (4 yes, 3 no)              |
| <b><i>Material assistance to patient group members by a donor</i></b>                                                                                                                   |                              |
| Donor allowed to directly pay for conference travel and accommodation for group representatives and participants                                                                        | 1 (yes)                      |
| Donor allowed to directly pay staff salary or provide staff support for group                                                                                                           | 2 (1 yes, 1 no)              |
| <b><i>Other interactions between patient members of group and donor</i></b>                                                                                                             |                              |
| Donor allowed to provide information to patient members of group about products donor makes                                                                                             | 4 (2 yes, 2 no)              |
| Donor allowed to access membership data or membership lists                                                                                                                             | 2 (1 yes, 1 no)              |
| Donor allowed to provide patient group members with advocacy materials                                                                                                                  | 3 (1 yes, 2 no)              |

|                                                                                                                             |                 |
|-----------------------------------------------------------------------------------------------------------------------------|-----------------|
| Donor allowed to provide gifts of noneducational value to patient group members                                             | 1 (no)          |
| Donor allowed to provide information to patient group members about policies or positions adopted or suggested by the donor | 1 (no)          |
| <b><i>Independent monitoring of activities and compliance with policies</i></b>                                             |                 |
| Monitoring of compliance with group's policies                                                                              | 3 (no)          |
| Actions if group is not compliant with its policies                                                                         | 2 (1 yes, 1 no) |
| Audit of what activities donor money has been spent on                                                                      | 2 (1 yes, 1 no) |
| Public availability of results of audits, monitoring, compliance                                                            | 2 (no)          |

Sixteen (16.5%) groups had policies about all donations, but only 6 (6.2%) of these policies stated that the source of donations had to be made public and no group required public reporting of the amount of donations. Similarly, no group required that the purpose of donations be publicly disclosed. Five (5.2%) groups did not allow donations to be tied to a donor-initiated project and 5 (5.2%) groups did allow this type of donation.

Thirteen (13.4%) groups had policies that covered group independence and all stated that the group had total independence in decision-making. However, only 2 (2.1%) groups dealt with whether donors are allowed to directly organize seminars, lectures, projects or meetings (1 permitted such activities, the other did not).

The policies of 15 (15.5%) groups covered endorsements and the display of donors' names and logos. Four (4.1%) groups did allow and 4 (4.1%) did not allow the name and/or logo of donors to be listed on their websites except to identify the donor and the amount of money that the donor gave. Eleven (11.3%) groups did not allow endorsements of products and/or companies while 3 (3.1%) did. Four (4.1%) groups allowed hyperlinks to donors' websites.

Eight (8.2%) groups had policies that regulated material assistance to patient group members by a donor and 6 (6.2%) groups had policies on other types of interactions between patient members of the group and donor. In the case of the former, 1 (1.0%) group allowed donors to

1  
2  
3 directly pay for conference travel and accommodation for group representatives and  
4 participants and 2 (2.1%) groups had policies covering whether donors were allowed to  
5 directly pay staff salary or provide staff support for the group (1 = yes, 1 = no). In the case of  
6 the latter, 2 (2.1%) groups did, and 2 (2.1%) groups did not allow donors to provide  
7 information to patient members of the group about products the donor manufactures and 2  
8 (2.1%) groups controlled whether donors were allowed to access membership data or  
9 membership lists (1 = yes, 1 = no).

10  
11  
12  
13  
14  
15  
16  
17  
18  
19  
20  
21  
22 Three (3.1%) groups mentioned that there was no monitoring of compliance with the group's  
23 policies, while 2 (2.1%) groups had policies about actions that could be taken if the group  
24 was not compliant with its policies (1 = action would be taken, 1 = no action would be taken).  
25  
26  
27  
28 Two (2.1%) groups mentioned whether there was an audit of the activities on which donor  
29 money had been spent (1 = audit, 1 = no audit).  
30  
31  
32  
33  
34

## 35 Discussion

36  
37  
38 In general, we found that pharmaceutical industry funding of the included patient groups was  
39 frequent, with over half (54.6%) indicating that they had received donations from companies  
40 in this sector. Despite this, relatively little information was provided on patient group  
41 websites about their relationships with pharmaceutical companies. Only a single group  
42 reported the total amount of revenue from this source, none gave the exact amount from  
43 individual donors, and only 8 groups stated the purpose of the donations. The employment  
44 history of people on patient group boards was typically not given, making it impossible to  
45 determine if they had a past or present history of working for a pharmaceutical company.  
46  
47  
48 Similarly, only 4 groups provided employment histories of their staff. On-the-other hand,  
49 some practices were common. Almost 40% of the groups 37 (out of 97) displayed the logos  
50  
51  
52  
53  
54  
55  
56  
57  
58  
59  
60

1  
2  
3 of pharmaceutical company donors on their websites including 20 groups that hyperlinked to  
4  
5 pharmaceutical company websites.  
6  
7  
8  
9

10 We also observed that only 26 out of 97 groups had policies that directly dealt with their  
11 relationships with pharmaceutical companies. Even when groups did have such policies,  
12 those policies often did not cover key aspects of these relationships. For example, only half of  
13 the 26 policies stated that the group had complete independence of decision-making and no  
14 group's policy covered current or previous employment of board members. Worryingly, an  
15 even smaller minority of groups had policies that dealt with topics such as material assistance  
16 to patient group members by a donor and having independent monitoring of activities and  
17 compliance with policies.  
18  
19  
20  
21  
22  
23  
24  
25  
26  
27  
28  
29

30 On-the-one hand, our results show that in the absence of policies most groups do not make  
31 key information public about relationships with pharmaceutical companies including the  
32 purpose of donations that they received. But our findings also suggest that, in practice, some  
33 groups may follow unwritten policies. For example, although product endorsements were  
34 only dealt with in 14 policies, 67 groups did not have any product endorsements on their  
35 websites.  
36  
37  
38  
39  
40  
41  
42  
43  
44  
45  
46

47 With some variations, our findings are broadly in line with studies from other countries that  
48 analyzed information and policies on patient group websites. Ball and colleagues studied  
49 patient organizations in Australia, Canada, South Africa, the United Kingdom and the United  
50 States (US) and found that corporate donations were acknowledged in only 7 out of 37 annual  
51 reports and, similar to our results where 1 out of 97 groups gave enough information to show  
52 the proportion of funding from pharmaceutical companies, none of the groups in the Ball et al  
53  
54  
55  
56  
57  
58  
59  
60

1  
2  
3 paper gave this information.<sup>15</sup> Thirty-six (52.9%) out of 68 Australian groups that received  
4 industry funding disclosed the use that they made of the money,<sup>19</sup> whereas only 4.2% did so  
5 in our study. Three out of 157 Italian patient and consumer groups (6%) reported the amount  
6 of funding from pharmaceutical companies, 25 (54%) reported the activities funded but none  
7 reported the proportion of income derived from drug companies.<sup>20</sup> None of 24 American  
8 dermatology organizations reported the exact amount or use of donations.<sup>12</sup> A systematic  
9 review that included 5 studies that examined patient groups' websites found that a median of  
10 75% reported receiving funding from pharmaceutical companies<sup>21</sup> compared to 54.6% in our  
11 study. Another 9 studies in the review reported that between 0% and 50% of groups disclosed  
12 the amount of funding that they received, between 0% and 6% of groups reported the  
13 proportion of their budget coming from company funding, and a median of 22% of  
14 organizations reported on how the funding was used.

15  
16  
17 In the international study of patient groups by Ball and colleagues, one third of websites  
18 showed one or more company logos and/or had links to websites of pharmaceutical  
19 companies<sup>15</sup> compared to 20.5% in our study. Forty-nine out of 133 Australian groups had  
20 company logos, web links or advertisements on their websites and 6 had board members that  
21 were currently or previously employed by pharmaceutical companies.<sup>19</sup> Among members of  
22 the US National Health Council,<sup>22</sup> 24 of 47 patient advocacy organizations had policies that  
23 addressed institutional conflict of interest<sup>23</sup> while less than one-fifth of Australian groups had  
24 publicly available policies on corporate sponsorship.<sup>19</sup> In a systematic review, the prevalence  
25 estimates of organizational policies that govern corporate sponsorship ranged from 2% to  
26 64%.<sup>24</sup> In our case, 16.5% of groups had policies about donations and revenue generation.

### 27 28 29 30 31 32 33 34 35 36 37 38 39 40 41 42 43 44 45 46 47 48 49 50 51 52 53 54 55 56 57 58 59 60 *Limitations*



1  
2  
3 As Canada has no centralized database of industry funding of patient groups, we relied on  
4 information reported on groups' websites about their pharmaceutical industry funding and we  
5 had no way of verifying the accuracy of the information. We identified patient groups to  
6 include in our study based primarily on whether they provided advice to government  
7 institutions. However, this may constitute a biased sample of Canadian patient groups and  
8 other groups may differ in terms of which information is made public and the extent of their  
9 policies. We only looked at whether policies existed for certain topics and did not evaluate  
10 the strength of the policies. Other documents may have covered areas that were of interest to  
11 us, but if these documents were not identified as policies we may have missed them. Finally,  
12 we asked groups about their policies in 2019 and started collection information from their  
13 websites in September 2020. It is possible that some groups subsequently updated their  
14 websites or policies, although we verified that the information was current to April 2021.

## 33 **Conclusion**

34  
35 In the past few decades, patient groups in Canada have evolved rapidly to play a  
36 consequential policy role in agencies like Health Canada, provincial and territorial health  
37 ministries, Common Drug Review, pan-Canadian Oncology Drug Review, Quebec's Institut  
38 national d'excellence en santé et en services sociaux, and other provincial and territorial drug  
39 programs. Government organizations have also increasingly made it a practice to include  
40 patient and public representation in decision-making. By speaking from patients' experience,  
41 groups can add to our understanding of patients' needs and suggest useful system changes,  
42 including in drug policy. However, other than the law governing charitable organizations,  
43 which makes few requirements for public reporting of corporate donations, patient  
44 organizations are not answerable to any national regulatory or governing body. It is left to the  
45 groups themselves to decide what information they will reveal on their websites about

1  
2  
3 corporate donations and whether they develop policies to guide their interactions with their  
4  
5 donors. Our study found that most groups had no explicit policies guiding these interactions  
6  
7 and that in general very limited information is disclosed.  
8  
9

10  
11  
12 The inconsistencies we discovered are not surprising given the absence of external  
13  
14 requirements and the varied histories, mandates and resources of the groups themselves. Each  
15  
16 group exists to serve its particular patient constituency, not the public at large, and the  
17  
18 absence of requirements for public accountability is not the fault of the organizations. A few  
19  
20 groups have taken the initiative to adopt strong transparency policies in their relations with  
21  
22 the pharmaceutical industry and we applaud the example they set.  
23  
24  
25  
26  
27

28  
29 Patient groups have an important role to play in the health care system as a voice for their  
30  
31 membership. However, in order to truly act as an independent voice for patient and not for  
32  
33 their pharmaceutical industry sponsors, groups need to adopt a much more transparent  
34  
35 approach to reporting on their relationships with companies and to develop policies that  
36  
37 clearly define the extent of those relationships. If they are unable or unwilling to take this  
38  
39 step, then federal and provincial governments should mandate the disclosure of industry  
40  
41 funding information by groups.  
42  
43  
44  
45  
46  
47  
48  
49  
50  
51  
52  
53  
54  
55  
56  
57

58 **Figure 1 caption:**  
59  
60

1  
2  
3  
4  
5  
6  
7  
8  
9  
10  
11  
12  
13  
14  
15  
16  
17  
18  
19  
20  
21  
22  
23  
24  
25  
26  
27  
28  
29  
30  
31  
32  
33  
34  
35  
36  
37  
38  
39  
40  
41  
42  
43  
44  
45  
46  
47  
48  
49  
50  
51  
52  
53  
54  
55  
56  
57  
58  
59  
60

**Selection of patient groups**

For peer review only

## Acknowledgements

Drs. Lisa Bero, Adriane Fugh-Berman, Quinn Grundy, Barbara Jane Mintzes and Lisa Parker provided comments on initial versions of the data extraction tool. Drs. Barbara Jane Mintzes and Lisa Parker provided feedback on the manuscript.

## Contributorship statement

AS came up with the idea for this study. JL and AS developed the data extraction tool. JL, AS, SB and DG gathered and analyzed the data. JL wrote the first draft of the manuscript. AS, SB and DG revised the manuscript. JL, AS, SB, DG approved the final version of the manuscript.

## Competing interests

In 2017-2020, Joel Lexchin received payments for being on a panel at the American Diabetes Association, for talks at the Toronto Reference Library, for writing a brief in an action for side effects of a drug for Michael F. Smith, Lawyer and a second brief on the role of promotion in generating prescriptions for Goodmans LLP and from the Canadian Institutes of Health Research for presenting at a workshop on conflict-of-interest in clinical practice guidelines. He is currently a member of research groups that are receiving money from the Canadian Institutes of Health Research and the Australian National Health and Medical Research Council. He is a member of the Foundation Board of Health Action International and the Board of Canadian Doctors for Medicare. He receives royalties from University of Toronto Press and James Lorimer & Co. Ltd. for books he has written.

Sharon Batt has received payment for commissioned briefs related to patient advocacy and industry funding from the National Federation of Nurses Unions and the Canadian Health Coalition.

1  
2  
3 Devorah Goldberg and Adrienne Shnier have no competing interests to declare.  
4

5 **Funding**  
6

7  
8 This research received no specific grant from any funding agency in the public, commercial  
9  
10 or not-for profit sectors.  
11

12 **Data sharing statement**  
13

14 The raw data used for analysis of information on patient groups' websites and their policies is  
15  
16 available on request.  
17  
18  
19  
20  
21  
22  
23  
24  
25  
26  
27  
28  
29  
30  
31  
32  
33  
34  
35  
36  
37  
38  
39  
40  
41  
42  
43  
44  
45  
46  
47  
48  
49  
50  
51  
52  
53  
54  
55  
56  
57  
58  
59  
60

## References

1. Baggott R, Jones K. The voluntary sector and health policy: the role of national level health consumer and patients' organisations in the UK. *Social Science & Medicine* 2014;123:202-09.
2. Jones K, Baggott R, Allsop J. Influencing the national policy process: the role of health consumer groups. *Health Expectations* 2004;7:18-28.
3. Batt S. Health Advocacy Inc.: How Pharmaceutical Funding Changed the Breast Cancer Movement. Vancouver: UBC Press 2017.
4. Weeks C. When patients and drug makers align on a cause, whose best interests are at play? *Globe and Mail* 2016 January 28.
5. Goomansingh C. Patient groups fighting for coverage of pricey drugs get pharma funding: Global News; 2014 [Available from: <http://globalnews.ca/news/1690509/what-role-do-pharmaceutical-companies-play-in-gaining-support-for-their-drugs/> accessed July 31 2018].
6. Lexchin J. Association between commercial funding of Canadian patient groups and their views about funding of medicines: an observational study. *PLoS One* 2019;14:e0212399.
7. British Columbia. Your voice 2019 [Available from: <https://www2.gov.bc.ca/gov/content/health/health-drug-coverage/pharmacare-for-bc-residents/what-we-cover/drug-coverage/drug-review-process-results/your-voice> accessed April 22 2019].
8. Ontario Ministry of Health and Long-Term Care. Patient evidence submissions 2018 [updated November 14. Available from: [https://www.health.gov.on.ca/en/pro/programs/drugs/patient\\_evidence/registered\\_advocacy\\_groups.aspx](https://www.health.gov.on.ca/en/pro/programs/drugs/patient_evidence/registered_advocacy_groups.aspx) accessed April 22 2019].

- 1  
2  
3 9. CADTH. Number of patient groups registered with CADTH's pan-Canadian Oncology  
4  
5 Drug Review program 2018 [Available from:  
6  
7 10  
11 14  
15 18  
19 22  
23 26  
27 30  
31 34  
35 38  
39 42  
43 46  
47 50  
51 54  
55 58  
59 [https://bestmedicinescoalition.org/members/](https://www.cadth.ca/sites/default/files/pcodr/Submit%20%26%20Contribute/pcodr-<br/>60</a> registered-patientadgrps.pdf accessed April 23 2019.</li><li>10. Best Medicines Coalition. Coalition members 2019 [Available from:<br/><a href=) accessed April 23 2019.
11. McCoy M, Carniol M, Chockley K, et al. Conflicts of interest for patient-advocacy organizations. *New England Journal of Medicine* 2017;376:880-85.
12. Li D, Singer S, Mostaghimi A. Prevalence and disclosure of potential conflicts of interest in dermatology patient advocacy organizations. *JAMA Dermatology* 2019;155:460-64. doi: DOI:10.1001/jamadermatol.2018.5102
13. Herxheimer A. Relationships between the pharmaceutical industry and patients' organisations. *BMJ* 2003;326:1208-10.
14. Hemminki E, Toiviainen H, Vuorenkoski L. Co-operation between patient organisations and the drug industry in Finland. *Social Science & Medicine* 2010;70:1171-75.
15. Ball D, Tisocki K, Herxheimer A. Advertising and disclosure of funding on patient organization websites: a cross sectional survey. *BMC Public Health* 2006;6:201.
16. Karas L, Feldman R, Bai G, et al. Pharmaceutical industry funding to patient-advocacy organizations: a cross-national comparison of disclosure codes and regulation. *Hastings International and Comparative Law Review* 2019;42:453-84.
17. Best Medicines Coalition. Code of conduct regarding funding for the Best Medicines Coalition and its members 2021 [Available from:  
<https://secureservercdn.net/198.71.233.39/fa4.f37.myftpupload.com/wp-content/uploads/2019/07/BMC-Code-of-Conduct-Regarding-Funding.pdf> accessed May 1 2021.

- 1  
2  
3  
4  
5  
6  
7  
8  
9  
10  
11  
12  
13  
14  
15  
16  
17  
18  
19  
20  
21  
22  
23  
24  
25  
26  
27  
28  
29  
30  
31  
32  
33  
34  
35  
36  
37  
38  
39  
40  
41  
42  
43  
44  
45  
46  
47  
48  
49  
50  
51  
52  
53  
54  
55  
56  
57  
58  
59  
60
18. Best Medicines Coalition, Health Charities Coalition of Canada, Canadian Medical Association, et al. Canadian consensus framework for ethical collaboration, no date [Available from: [http://innovativemedicines.ca/wp-content/uploads/2016/06/IMC\\_CONCENSUS\\_2016\\_HR\\_nobleed.pdf](http://innovativemedicines.ca/wp-content/uploads/2016/06/IMC_CONCENSUS_2016_HR_nobleed.pdf) accessed June 7 2021.
  19. Lau E, Fabbri A, Mintzes B. How do health consumer organisations in Australia manage pharmaceutical industry sponsorship? A cross-sectional study. *Australian Health Review* 2019;474-80. doi: doi: 10.1071/AH17288
  20. Colombo C, Mosconi P, Villani W, et al. Patient organizations' funding from pharmaceutical companies: is disclosure clear, complete and accessible to the public? An Italian survey. *PLoS One* 2012;7:e34974. doi: doi:10.1371/journal.pone.0034974
  21. Khabsa J, Semaan A, El-Harakeh A, et al. Financial relationships between patient and consumer representatives and the health industry: a systematic review. *Health Expectations* 2019;23:483-95. doi: DOI: 10.1111/hex.13013
  22. Putting patients first: National Health Council; 2021 [Available from: <https://nationalhealthcouncil.org> accessed May 30 2021.
  23. Brems J, McCoy M. A content analysis of patient advocacy organization policies addressing institutional conflicts of interest. *AJOB Empirical Bioethics* 2019;10(4):215-21. doi: DOI: 10.1080/23294515.2019.1670278
  24. Fabbri A, Parker L, Colombo C, et al. Industry funding of patient and health consumer organisations: systematic review with meta-analysis. *BMJ* 2020;368:l6925. doi: <http://dx.doi.org/10.1136/bmj.l6925>



1  
2  
3  
4  
5  
6  
7  
8  
9  
10  
11  
12  
13  
14  
15  
16  
17  
18  
19  
20  
21  
22  
23  
24  
25  
26  
27  
28  
29  
30  
31  
32  
33  
34  
35  
36  
37  
38  
39  
40  
41  
42  
43  
44  
45  
46  
47  
48  
49  
50  
51  
52  
53  
54  
55  
56  
57  
58  
59  
60

For peer review only

1  
2  
3  
4 Identification of patient groups (n = 294 in total):  
5

6 Registration with:

7 British Columbia Pharmacare (n = 121)

8 Ontario Drug Benefit Programs (n = 102)

9 panCanadian Oncology Drug Review (n = 44)

10  
11  
12 Membership:

13 Best Medicines Coalition (n = 27)  
14  
15

16  
17  
18  
19  
20  
21 Excluded:

22 Duplicates = 90

23 Not a national group = 88

24 No website or website not functional =  
25 10

26 Not a patient group = 5

27 Not a Canadian group = 3

28 Merger of two groups = 1  
29  
30  
31  
32  
33  
34  
35  
36

37 Included = 97  
38  
39  
40  
41  
42  
43  
44  
45  
46  
47  
48  
49  
50  
51  
52  
53  
54  
55  
56  
57  
58  
59  
60

1  
2  
3 July XX, 2019  
4

5 Dear Dr. XXX,  
6

7  
8 We are conducting a study on the funding of national Canadian patient groups. The  
9 purpose of this study is to examine how much money groups receive from sponsors,  
10 analyze the policies and affiliations of patient groups to determine the types of funding  
11 that are permitted, whether any conditions are associated with receipt of the funding, and  
12 how the money is used.  
13

14 We are requesting:  
15

- 16  
17 1. Any publicly available policy documents that describe your organization's criteria  
18 for accepting funding. An example of this might be a document that describes the  
19 process by which donations are considered and which donations may be accepted  
20 or refused. If this information exists and is publicly accessible, please either  
21 provide the url for the documents or attach them in your response email.  
22
- 23  
24 2. Any publicly available policy documents that describe your organization's  
25 position on how funds from acceptable sources are used. If this information exists  
26 and is publicly accessible, please either provide the url for the documents or  
27 attach them in your response email.  
28
- 29  
30 3. Any publicly available statements on your website that describe your  
31 organization's financial affiliations and donors, as well as the sum per annum that  
32 the organization receives from those donors. If this information exists on your  
33 website, please send us the url for that webpage.  
34
- 35  
36 4. Any publicly available statements on your website that list your organization's  
37 board membership including the names of the board members, employment  
38 information, and whether there are any current or former industry employees on  
39 the board. If this information exists on your website, please send us the url for that  
40 webpage.  
41

42 The only information being requested from you is publicly available policy documents  
43 and website urls. Since all of this information is publicly available it will not be kept  
44 confidential. Any final publication from this research will name the organizations  
45 involved and indicate that its communications contact or equivalent, director, or his/her  
46 delegate was contacted to provide the title and source of publicly available publications  
47 and websites, as requested above but no names of any individuals in the organization will  
48 be disclosed. Organizations that do not respond or provide any information will also be  
49 identified in any final publication. No individuals will be named. As per general journal  
50 policy all raw data will be deposited in a publicly accessible website. Should your  
51 organization wish a copy of any final publication we will be pleased to provide one to  
52 your organization.  
53

54  
55 Please respond within one month of receipt of this email.  
56  
57  
58  
59

1  
2  
3  
4 You can refuse to participate or withdraw from the study at any time without affecting  
5 the relationship with the researchers, York University or any group associated with this  
6 project.  
7

8  
9 In the event that you withdraw from the study, all associated data collected (individual  
10 responses and non-public documents) will be immediately destroyed wherever possible.  
11 However, publicly available information will be retained regardless of whether you  
12 withdraw from the study.  
13

14  
15 There are no potential risks to participating in this study.  
16

17 You can contact Alison M. Collins-Mrakas, Senior Manager & Policy Advisor, Research  
18 Ethics at 416-736-5914 or [acollins@yorku.ca](mailto:acollins@yorku.ca) for further information.  
19

20  
21 The research has been reviewed and approved by the Human Participants Review Sub-  
22 committee and conforms to the standards of the Canadian Tri-Council Research Ethics  
23 guidelines.  
24

25 Sincerely,  
26

27  
28 Adrienne Shnier Ph.D., J.D.  
29 Adjunct Professor, School of Health  
30 Policy and Management  
31 York University  
32 Email: [ashnier@yorku.ca](mailto:ashnier@yorku.ca)  
33

34  
35  
36  
37  
38  
39  
40  
41  
42  
43  
44  
45  
46  
47  
48  
49  
50  
51  
52  
53  
54  
55  
56  
57  
58  
59  
60  
Joel Lexchin MD  
Professor, School of Health Policy and  
Management  
York University  
E mail: [jlexchin@yorku.ca](mailto:jlexchin@yorku.ca)

Page 35 of 40

Logged in as **jlexchin** | Log out

My Projects

Project Home

Project Setup

Project status: **Production**

**Data Collection**

Manage Survey Participants

Record Status Dashboard

Add / Edit Records

Identification Number **101** [Select other record](#)

Data Collection Instruments:

**Part A: Data Extraction Tool for Patient Group Website**

Part B: Data Extraction Tool for Patient Group Policies

**Applications**

Calendar

Data Exports, Reports, and Stats

Data Import Tool

Data Comparison Tool

Logging

Field Comment Log

File Repository

User Rights and DAGs

**Help & Information**

Help & FAQ

Video Tutorials

Suggest a New Feature

Contact REDCap administrator

**Save Record**

Save and Continue

Save and go to Next Form

**Save and Mark Response as Complete**

Actions: [Download PDF of instrument\(s\)](#) [Share instrument in the Library](#) [VIDEO: Basic data entry](#)

**Part A: Data Extraction Tool for Patient Group Website**

Adding new Identification Number 101

Identification Number 101

Name of patient group (to be anonymized later)  \* must provide value

Does the website/annual/financial report provide the annual revenue for a fiscal year?  Yes  No [reset](#)

Provide the fiscal year for which this data extraction applies.  If more than one year, choose most recent.

Provide the total annual revenue of the patient group for this fiscal year.

Does the website/annual/fiscal report provide total annual revenue from pharmaceutical and medical device donors, specifically?  Yes  No [reset](#)

What information does the website/annual/financial report provide regarding the source and amount of grants and/or donations for the most recent fiscal year?  None  Donor(s) only  Amount(s) only  Donor(s) and amount(s)

What information is provided about the donation amount(s)?  None  Range of amount  Exact amount  Percent of total donations by type of source (i.e., corporate vs. foundation vs. human donors)

Does the website make the purpose of each donation public (i.e., donation earmarked for...)?  Yes  No [reset](#)

Does the website provide information the amount used for each activity?  Yes  No [reset](#)

If exact value, category (i.e., gold, silver, bronze) or range (i.e., \$5000-9999) for donation amounts is available, provide.

Are donors' logos provided?  Yes  No [reset](#)

Are hyperlinks to donor websites provided?  No  Yes  Some

Does the website provide identities of the board members?  Yes  No [reset](#)

What information is provided about board members' employment?  None  Brief synopsis  Specific (i.e., year ranges with position title, employer details)

Does the employment information or synopsis for board members disclose any current or previous employment in the pharmaceutical or medical device industries?  No  Yes

Does the employment information or synopsis for staff (i.e., communications director, administrative staff) disclose any current or previous employment in the pharmaceutical or medical device industries?  Yes  No [reset](#) Note: whether paid or volunteer

Does the website provide information on external audit reports?  Yes  No [reset](#)

List the criteria that are audited.

Does the patient group endorse any specific treatment or donor?  No  Treatment  Donor [Check all that apply](#)

**Form Status**

Complete?  Incomplete [↕](#)

**Save Record**

Save and Continue

Save and go to Next Form

**Save and Mark Response as Complete**

-- Cancel --

**REDCap**

Logged in as jlexchin | Log out

My Projects

Project Home

Project Setup

Project status: **Production**

**Data Collection**

- Manage Survey Participants
- Record Status Dashboard
- Add / Edit Records
- Identification Number **101** [Select other record](#)

Data Collection Instruments:

- Part A: Data Extraction Tool for Patient Group Website
- Part B: Data Extraction Tool for Patient Group Policies**

**Applications**

- Calendar
- Data Exports, Reports, and Stats
- Data Import Tool
- Data Comparison Tool
- Logging
- Field Comment Log
- File Repository
- User Rights and DAGs
- Help & Information
- Help & FAQ
- Video Tutorials
- Suggest a New Feature
- Contact REDCap administrator

Actions: [Download PDF of instrument\(s\)](#) [Share instrument in the Library](#)

**Part B: Data Extraction Tool for Patient Group Policies**

Adding new Identification Number 101

Identification Number: 101

Patient group name (to be anonymized later):

Does the patient group have a relevant publicly available policy?  
 Yes  
 No  
Policy document must be clearly identifiable as a policy/guidance document. [reset](#)

Do/es the policy document/s cover any of the following content areas?  
 Board and/or advisory board  
 Acceptance of donations and revenue generation  
 Independence of decision-making  
 Endorsements  
 Assistance to patient members from a donor, or another company/person acting on behalf of a donor  
 Interaction between donor, or another company/person acting on behalf of a donor, and patient members  
 Audits, monitoring, and compliance  
 None of the above  
 Other  
Choose all that apply. None of the above = Policy available, but does not address any of our categories.

Does the organization's policy state that the names of board members must be provided on its website?  
 No  
 Yes  
 No policy

Does the organization's policy allow people who currently work for a donor, or who have a financial relationship with a donor, to participate on an advisory board?  
 No  
 Yes  
 No policy

Does the organization's policy state that current and/or previous employment information for board members must be disclosed on its website?  
 No  
 Yes  
 No policy

Does the organization's policy allow people who previously worked for, or currently work for, or have a financial relationship with a donor, to participate on the executive body of the board of the organization?  
 No  
 Yes  
 No policy

Does the organization's policy require the board and/or executive director to approve donations prior to receipt?  
 No  
 Yes  
 No policy

Does the organization's policy provide any other regulation of board membership?  
  
[Expand](#)

Does the organization's policy state that the source of donations and amount must be disclosed publicly?  
 No  
 Yes, source  
 Yes, amount  
 Yes, source and amount  
 No policy

Does the organization's policy allow for the acceptance of grant or donation money that is contingent on a donor-initiated project?  
 No  
 Yes  
 No policy

Does the organization's policy permit the acceptance of grants from only particular donors?  
 No  
 Yes  
 No policy

Does the organization's policy state that the purpose of accepted donations must be publicly disclosed?  
 No  
 Yes  
 No policy

Does the organization's policy permit accepting money from exclusively a single donor?  
 No  
 Yes  
 No policy

Does the organization's policy allow only a fixed amount of its annual revenue to be provided by a single donor?  
 No  
 Yes  
 No policy

Does the organization's policy set a fixed limit on the percentage of its annual revenue that it will accept from donors in total?  
 No  
 Yes  
 No policy

Does the organization's policy allow for "sponsorship packages", i.e., what benefits donors get from donations of a certain amount (e.g., exhibit space, company's name on all room keys, etc.)?  
 No  
 Yes  
 No policy

Does the organization's policy state that the organization has total independence in its decision making?  
 No  
 Yes  
 No policy

Does the organization's policy state that the patient group retains final and complete control over all decisions it makes, all materials, and pronouncements that carry its name?  
 No  
 Yes  
 No policy

Does the organization's policy allow for the name of any donor to be listed on its website under any circumstances, except to identify the name and/or logo of the donor and the amount of money received, i.e., for an endorsement?  
 No  
 Yes  
 No policy

Does the organization's policy allow for the endorsement of any specific treatment or any specific donor?  
 No  
 Yes  
 No policy

Does the organization's policy allow for a hyperlink to be provided to a donor's website?  
 No  
 Yes  
 No policy

Does the organization's policy allow for the patient group to directly or indirectly cooperate with companies in lobbying, testifying, addressing legislators, regulators, or policymakers, writing articles or policy briefs, etc. (e.g., submit its own letter and support donor's position)?  
 No  
 Yes  
 No policy

Does the organization's policy allow donors to directly organize seminars, lectures, projects, or meetings?  
 No  
 Yes  
 No policy

Does the organization's policy allow donors to directly provide funding for seminars, lectures, projects, or meetings?  
 No  
 Yes  
 No policy

Does the organization's policy allow donors to directly contribute to printing costs?  
 No  
 Yes  
 No policy

Does the organization's policy allow donors to directly plan/arrange recreational services, lodging or travel for representative of the organization or participants?  
 No  
 Yes  
 No policy

Does the organization's policy allow donors to directly pay for conference travel and accommodation for organization representatives or participants?  
 No  
 Yes  
 No policy

Does the organization's policy allow donors to directly sponsor research grants, study fellowships, internships, or other opportunities administered by the organization for people in the field?  
 No  
 Yes  
 No policy

Does the organization's policy allow donors to provide donations in kind, e.g., facilities, administration, training materials, books for libraries, website design?  
 No  
 Yes  
 No policy

Does the organization's policy allow donors to directly pay staff salaries or provide staff support?  
 No  
 Yes  
 No policy

Does the organization's policy allow for any other assistance from donors or other companies acting on behalf of donors?  
  
[Expand](#)

Does the organization's policy allow donors to provide information to patient group members about products that the donor makes?  
 No  
 Yes  
 No policy

Does the organization's policy allow donors to provide gifts of educational value to patient group members (e.g., webinars, books, brochures)?  
 No  
 Yes  
 No policy

Does the organization's policy allow for donors to provide gifts of non-educational value to patient group members?  
 No  
 Yes  
 No policy

Does the organization's policy allow donors to provide patient group members with advocacy materials?  
 No  
 Yes  
 No policy

Does the organization's policy allow donors to provide a nurse/social worker/etc. to assist patient group members with treatment?  
 No  
 Yes  
 No policy

Does the organization's policy allow donors to survey patient group members, access membership data or membership lists, or otherwise gain information about members?  
 No  
 Yes  
 No policy

Does the organization's policy allow donors to provide expert opinions about products or policies?  
 No  
 Yes  
 No policy

Does the organization's policy allow donors to provide opportunities to patient group members to learn about lobbying/advocacy techniques?  
 No  
 Yes  
 No policy

Does the organization's policy allow donors to encourage individual lobbying/advocacy activities for patient group members?  
 No  
 Yes  
 No policy

Does the organization's policy allow donors to provide information to patient group members about policies or positions adopted or suggested by the donor?  
 No  
 Yes  
 No policy

If the organization's policy regulates any other areas of interaction between patient group members and donors, list.  
  
[Expand](#)

Does the organization's policy provide for any independent monitoring of their policies?  
 No  
 Yes  
 No policy

Does the organization's policy provide for an independent audit regarding on what activities donor money has been spent?  
 No  
 Yes  
 No policy

Does the organization's policy provide for publicly available results of the independent monitoring?  
 No  
 Yes  
 No policy

Does the organization's policy provide for what happens if the organization is not compliant with its policies? (i.e., internal review if noncompliance.)  
 No  
 Yes  
 No policy

**Form Status**

Complete?

[Save Record](#)  
[Save and Continue](#)  
[Save and Mark Response as Complete](#)

[-- Cancel --](#)

**Supplementary File 4: Names of patient groups, websites and**

|    | <b>Name of group</b>                                      | <b>Website</b>                                                                                | <b>Notes</b> | <b>Number of pieces of information analyzed</b> |
|----|-----------------------------------------------------------|-----------------------------------------------------------------------------------------------|--------------|-------------------------------------------------|
| 1  | AboutFace Craniofacial Family Society                     | <a href="http://www.aboutface.ca">www.aboutface.ca</a>                                        |              | 3                                               |
| 2  | Advocacy for Canadian Childhood Oncology Research Network | <a href="http://www.curesforourkids.com">http://www.curesforourkids.com</a>                   |              | 4                                               |
| 3  | aHUS Canada/SHUa                                          | <a href="http://www.ahuscanada.org">www.ahuscanada.org</a>                                    |              | 8                                               |
| 4  | ALS Society of Canada                                     | <a href="https://www.als.ca">https://www.als.ca</a>                                           |              | 8                                               |
| 5  | Aplastic Anemia and Myelodysplasia Association of Canada  | <a href="http://www.aamac.ca">www.aamac.ca</a>                                                |              | 3                                               |
| 6  | Arthritis Consumer                                        | <a href="http://www.jointhehealth.org">www.jointhehealth.org</a>                              |              | 15                                              |
| 7  | Asthma Canada                                             | <a href="https://asthma.ca">https://asthma.ca</a>                                             |              | 22                                              |
| 8  | Best Medicines Coalition                                  | <a href="https://bestmedicinescoalition.org">https://bestmedicinescoalition.org</a>           |              | 10                                              |
| 9  | Bladder Cancer Canada                                     | <a href="https://bladdercancer.ca/en/">https://bladdercancer.ca/en/</a>                       |              | 8                                               |
| 10 | Brain Tumour Foundation of Canada                         | <a href="https://www.braintumour.ca">https://www.braintumour.ca</a>                           |              | 4                                               |
| 11 | Canadian Arthritis Patient Alliance                       | <a href="http://www.arthritispatient.ca">www.arthritispatient.ca</a>                          |              | 24                                              |
| 12 | Canadian Breast Cancer Network                            | <a href="https://www.cbcn.ca/en/">https://www.cbcn.ca/en/</a>                                 |              | 10                                              |
| 13 | Canadian Cancer                                           | <a href="http://www.cancer.ca">www.cancer.ca</a>                                              |              | 8                                               |
| 14 | Canadian Cancer Survivor Network                          | <a href="http://www.survivornet.ca">www.survivornet.ca</a>                                    |              | 7                                               |
| 15 | Canadian Council of the                                   | <a href="http://www.ccbnational.net">www.ccbnational.net</a>                                  |              | 7                                               |
| 16 | Canadian Digestive Health Foundation                      | <a href="https://cdhf.ca">https://cdhf.ca</a>                                                 |              | 2                                               |
| 17 | Canadian Epilepsy Alliance                                | <a href="http://www.canadianepilepsyalliance.org">http://www.canadianepilepsyalliance.org</a> |              | 3                                               |
| 18 | Canadian Hemophilia                                       | <a href="https://www.hemophilia.ca">https://www.hemophilia.ca</a>                             |              | 8                                               |
| 19 | Canadian Hospice Palliative Care                          | <a href="http://www.chpca.net">http://www.chpca.net</a>                                       |              | 10                                              |
| 20 | Canadian Liver                                            | <a href="http://www.liver.ca">www.liver.ca</a>                                                |              | 7                                               |
| 21 | Canadian Mental Health Association                        | <a href="https://cmha.ca">https://cmha.ca</a>                                                 |              | 3                                               |
| 22 | Canadian Mesothelioma Foundation                          | <a href="http://cmfonline.org">http://cmfonline.org</a>                                       |              | 1                                               |

|    |                                                                 |                                                                                                             |                                       |                |
|----|-----------------------------------------------------------------|-------------------------------------------------------------------------------------------------------------|---------------------------------------|----------------|
| 23 | Canadian MPN Network                                            | <a href="http://canadianmpnnetwork.ca">http://canadianmpnnetwork.ca</a>                                     |                                       | 2              |
| 24 | Canadian Organization for Rare Disorders                        | <a href="http://www.raredisorders.ca">www.raredisorders.ca</a>                                              |                                       | 4              |
| 25 | Canadian Pain Coalition                                         | <a href="https://www.facebook.com/CanadianPainCoalition">https://www.facebook.com/CanadianPainCoalition</a> |                                       | 0              |
| 26 | Canadian PBC Society                                            | <a href="http://www.pbc-society.ca">www.pbc-society.ca</a>                                                  |                                       | 1              |
| 27 | Canadian Pemphigus and Pemphigoid                               | <a href="http://pemphigus.ca">http://pemphigus.ca</a>                                                       |                                       | 1              |
| 28 | Canadian Pituitary Patient Network                              | <a href="https://canadianpituitary.org">https://canadianpituitary.org</a>                                   |                                       | 0              |
| 29 | Canadian PKU & Allied Disorders Inc.                            | <a href="http://www.canpku.org">www.canpku.org</a>                                                          |                                       | 6              |
| 30 | Canadian Psoriasis Network                                      | <a href="http://www.canadianpsoriasisnetwork.com">www.canadianpsoriasisnetwork.com</a>                      |                                       | 1              |
| 31 | Canadian Pulmonary Fibrosis Foundation                          | <a href="http://www.cpff.ca">www.cpff.ca</a>                                                                |                                       | 2              |
| 32 | Canadian Skin Patient                                           | <a href="http://www.canadianskin.ca">www.canadianskin.ca</a>                                                |                                       | 2              |
| 33 | Canadian Society for Mucopolysaccharide & Related Diseases Inc. | <a href="http://www.mpsociety.ca">www.mpsociety.ca</a>                                                      |                                       | 1              |
| 34 | Canadian Society of Intestinal Research                         | <a href="https://www.badgut.org">https://www.badgut.org</a>                                                 |                                       | 1              |
| 35 | Canadian Spondylitis                                            | <a href="http://www.spondylitis.ca">http://www.spondylitis.ca</a>                                           |                                       | 1              |
| 36 | Canadian Treatment Action Council                               | <a href="http://www.ctac.ca">www.ctac.ca</a>                                                                | Website broken as of March 10, 2021   | Not applicable |
| 37 | Cancer Advocacy Coalition of Canada                             | <a href="http://www.canceradvocacy.ca">http://www.canceradvocacy.ca</a>                                     | Name now changed to: Cancer Survivors | 1              |
| 38 | Carcinoid-NeuroEndocrine                                        | <a href="http://www.cnetscanada.org">www.cnetscanada.org</a>                                                |                                       | 1              |
| 39 | Centre for ADHD Awareness, Canada                               | <a href="http://www.caddac.ca">www.caddac.ca</a>                                                            |                                       | 1              |
| 40 | Chronic Lymphocytic Leukemia Patient Advocacy Group (CLL)       | <a href="http://www.clipag.ca">www.clipag.ca</a>                                                            | Name now changed to: CLL Canada       | 3              |
| 41 | Chronic Myelogenous Leukemia Society of Canada                  | <a href="http://cmlsociety.org">http://cmlsociety.org</a>                                                   | Name now changed to: CML Society      | 8              |
| 42 | Chronic Pain Association of Canada                              | <a href="http://www.chronicpaincanada.com">www.chronicpaincanada.com</a>                                    |                                       | 1              |



|    |                                                                  |                                                                                                                                       |                                                                                                   |                |
|----|------------------------------------------------------------------|---------------------------------------------------------------------------------------------------------------------------------------|---------------------------------------------------------------------------------------------------|----------------|
| 43 | CNIB<br>(Canadian National<br>Institute for the Blind)           | <a href="http://www.cnib.ca">www.cnib.ca</a>                                                                                          |                                                                                                   | 8              |
| 44 | Colorectal Cancer<br>Canada                                      | <a href="https://www.colorectalcanadacancer.ca">https://www.colorectalcanadacancer.ca</a>                                             |                                                                                                   | 11             |
| 45 | Consumer Advocare<br>Network                                     | <a href="http://survivornet.ca/en/partners/consumer_advocare_network">http://survivornet.ca/en/partners/consumer_advocare_network</a> | Website broken as of March 10, 2021                                                               | Not applicable |
| 46 | COPD Canada                                                      | <a href="http://www.copdcanada.in">www.copdcanada.in</a>                                                                              |                                                                                                   | 3              |
| 47 | COPD Canada Patient                                              | <a href="http://www.copdcanada.ca">www.copdcanada.ca</a>                                                                              |                                                                                                   | 0              |
| 48 | Craig's Cause Pancreatic<br>Cancer Society                       | <a href="http://www.craigscause.ca">http://www.craigscause.ca</a>                                                                     |                                                                                                   | 1              |
| 49 | Crohn's and Colitis<br>Canada                                    | <a href="http://www.crohnsandcolitis.ca">www.crohnsandcolitis.ca</a>                                                                  |                                                                                                   | 4              |
| 50 | Cystic Fibrosis Canada                                           | <a href="http://www.cysticfibrosis.ca">www.cysticfibrosis.ca</a>                                                                      |                                                                                                   | 5              |
| 51 | Diabetes Canada<br>(Canadian Diabetes)                           | <a href="http://www.diabetes.ca">www.diabetes.ca</a>                                                                                  |                                                                                                   | 24             |
| 52 | Eczema Society of                                                | <a href="https://eczemahelp.ca">https://eczemahelp.ca</a>                                                                             |                                                                                                   | 19             |
| 53 | FH Canada Patient<br>Network                                     | <a href="https://thefhfoundation.org/global-fh-canada">https://thefhfoundation.org/global-fh-canada</a>                               | Name now changed to:<br>FH<br>Foundation                                                          | 18             |
| 54 | Food Allergy Canada<br>(Anaphylaxis Canada)                      | <a href="https://foodallergycanada.ca">https://foodallergycanada.ca</a>                                                               |                                                                                                   | 14             |
| 55 | Foundation Fighting<br>Blindness                                 | <a href="https://ffb.ca">https://ffb.ca</a>                                                                                           | New website:<br><a href="https://www.fightingblindness.org">https://www.fightingblindness.org</a> | 18             |
| 56 | Foundation for Prader-<br>Willi Research Canada<br>(FPWR Canada) | <a href="https://www.fpwr.ca">https://www.fpwr.ca</a>                                                                                 |                                                                                                   | 2              |
| 57 | GIST Sarcoma Life Raft<br>Group Canada                           | <a href="https://liferaftgroup.ca/welcome/">https://liferaftgroup.ca/welcome/</a>                                                     |                                                                                                   | 4              |
| 58 | HeartLife Foundation                                             | <a href="http://www.heartlife.ca">www.heartlife.ca</a>                                                                                |                                                                                                   | 1              |
| 59 | Hep C Awareness.com                                              | <a href="http://www.hepcawareness.com">www.hepcawareness.com</a>                                                                      |                                                                                                   | 0              |
| 60 | HS Aware - Now<br>appears to be HS                               | <a href="http://www.hsaware.com">www.hsaware.com</a>                                                                                  | New website:<br>Hsaware.ca                                                                        | 3              |
| 61 | Huntington Society of<br>Canada                                  | <a href="https://www.huntington-society.ca">https://www.huntington-society.ca</a>                                                     |                                                                                                   | 24             |
| 62 | Hypertension Canada                                              | <a href="https://hypertension.ca/about-us/">https://hypertension.ca/about-us/</a>                                                     |                                                                                                   | 7              |
| 63 | Kidney Cancer Canada                                             | <a href="https://www.kidneycancer.ca">https://www.kidneycancer.ca</a>                                                                 |                                                                                                   | 13             |
| 64 | Leukemia & Lymphoma<br>Society of Canada                         | <a href="https://www.llscanada.org">https://www.llscanada.org</a>                                                                     |                                                                                                   | 9              |

|    |                                                      |                                                                                         |                                                                           |
|----|------------------------------------------------------|-----------------------------------------------------------------------------------------|---------------------------------------------------------------------------|
| 65 | Lung Cancer Canada                                   | <a href="http://www.lungcancercanada.ca">http://www.lungcancercanada.ca</a>             | 6                                                                         |
| 66 | Lupus Canada                                         | <a href="http://www.lupuscanada.org">www.lupuscanada.org</a>                            | 9                                                                         |
| 67 | Lymphoma Canada                                      | <a href="https://www.lymphoma.ca">https://www.lymphoma.ca</a>                           | 22                                                                        |
| 68 | Mastocytosis Society Canada                          | <a href="https://www.mastocytosis.ca/en/">https://www.mastocytosis.ca/en/</a>           | 17                                                                        |
| 69 | Melanoma Network of Canada                           | <a href="https://www.melanomanetwork.ca">https://www.melanomanetwork.ca</a>             | 35                                                                        |
| 70 | Millions Missing Canada                              | <a href="https://www.millionsmissingcanada.ca">https://www.millionsmissingcanada.ca</a> | 5                                                                         |
| 71 | MS Society of Canada                                 | <a href="http://www.mssociety.ca">www.mssociety.ca</a>                                  | 74                                                                        |
| 72 | Myeloma Canada                                       | <a href="https://www.myeloma.ca">https://www.myeloma.ca</a>                             | 38                                                                        |
| 73 | National Gaucher Foundation of Canada                | <a href="http://www.gauchercanada.ca">www.gauchercanada.ca</a>                          | 10                                                                        |
| 74 | Neuroblastoma Canada                                 | <a href="http://neuroblastoma.ca">http://neuroblastoma.ca</a>                           | 4                                                                         |
| 75 | Osteoporosis Canada                                  | <a href="http://www.osteoporosis.ca">www.osteoporosis.ca</a>                            | 19                                                                        |
| 76 | Ovarian Cancer Canada                                | <a href="https://ovariancanada.ca">https://ovariancanada.ca</a>                         | 21                                                                        |
| 77 | Pancreatic Cancer Canada                             | <a href="http://www.pancreaticcancercanada.ca">http://www.pancreaticcancercanada.ca</a> | 20                                                                        |
| 78 | Parkinson Canada                                     | <a href="https://www.parkinson.ca">https://www.parkinson.ca</a>                         | 18                                                                        |
| 79 | Patient Commando                                     | <a href="http://www.patientcommando.ca">www.patientcommando.ca</a>                      | 8                                                                         |
| 80 | People in Pain Network                               | <a href="http://www.pipain.com">www.pipain.com</a>                                      | 8                                                                         |
| 81 | Polycystic Kidney Disease (PKD) Foundation of Canada | <a href="http://www.endpkd.ca">www.endpkd.ca</a>                                        | Name now changed to: PKD Foundation of Canada 5                           |
| 82 | Prostate Cancer Canada                               | <a href="http://www.prostatecancer.ca">http://www.prostatecancer.ca</a>                 | Now part of Canadian Cancer Society as of February 1, 2020 Not applicable |
| 83 | Pulmonary Hypertension                               | <a href="http://www.phacanada.ca">www.phacanada.ca</a>                                  | 15                                                                        |
| 84 | Rethink Breast Cancer                                | <a href="https://rethinkbreastcancer.com">https://rethinkbreastcancer.com</a>           | 8                                                                         |
| 85 | Robbie's Rainbow                                     | <a href="http://robbiesrainbow.ca">http://robbiesrainbow.ca</a>                         | 6                                                                         |
| 86 | Sarcoma Cancer Foundation of Canada                  | <a href="http://sarcomacancer.ca">http://sarcomacancer.ca</a>                           | 3                                                                         |
| 87 | Save Your Skin                                       | <a href="http://www.saveyourskin.ca">www.saveyourskin.ca</a>                            | 4                                                                         |
| 88 | Scleroderma Society of Canada                        | <a href="http://www.scleroderma.ca">www.scleroderma.ca</a>                              | Name now changed to: Scleroderma Canada 5                                 |
| 89 | Sjogren's Society of                                 | <a href="http://www.sjogrenscanada.ca">www.sjogrenscanada.ca</a>                        | 6                                                                         |

|    |     |                       |                                                              |              |
|----|-----|-----------------------|--------------------------------------------------------------|--------------|
| 1  |     |                       |                                                              |              |
| 2  | 90  | Soft Bones Canada     | <a href="http://www.softbonescanad">www.softbonescanad</a>   | 13           |
| 3  | 91  | The Canadian          | <a href="http://www.canadiancontine">www.canadiancontine</a> | 9            |
| 4  |     | Continence Foundation | <a href="http://nce.ca">nce.ca</a>                           |              |
| 5  | 92  | The Endometriosis     | <a href="https://endometriosis">https://endometriosis</a>    | Name now     |
| 6  |     | Network               | network.com                                                  | changed to:  |
| 7  |     |                       |                                                              | The          |
| 8  |     |                       |                                                              | Endometriosi |
| 9  |     |                       |                                                              | s Network    |
| 10 |     |                       |                                                              | Canada       |
| 11 |     |                       |                                                              |              |
| 12 |     |                       |                                                              |              |
| 13 | 93  | The Isaac Foundation  | <a href="https://www.theisaacf">https://www.theisaacf</a>    | 0            |
| 14 |     |                       | oundation.com                                                |              |
| 15 | 94  | Thyroid Cancer Canada | <a href="http://www.thyroidcancerca">www.thyroidcancerca</a> | 6            |
| 16 | 95  | Tourette Syndrome     | <a href="https://tourette.ca">https://tourette.ca</a>        | 14           |
| 17 |     | Foundation of Canada  |                                                              |              |
| 18 | 96  | Trigeminal Neuralgia  | <a href="http://www.tnac.org">www.tnac.org</a>               | 1            |
| 19 |     | Association of Canada |                                                              |              |
| 20 | 97  | Tuberous Sclerosis    | <a href="https://www.tscanada">https://www.tscanada</a>      | 7            |
| 21 |     | Canada Sclerose       | .ca                                                          |              |
| 22 | 98  | Type 1 Together       | <a href="http://www.type1together.c">www.type1together.c</a> | 4            |
| 23 | 99  | Wounds Canada         | <a href="https://www.woundsc">https://www.woundsc</a>        | 12           |
| 24 |     | (Canadian Association | anada.ca                                                     |              |
| 25 | 100 | Young Adult Cancer    | <a href="https://www.youngad">https://www.youngad</a>        | 10           |
| 26 |     | Canada                | ultcancer.ca                                                 |              |
| 27 |     |                       |                                                              |              |
| 28 |     |                       |                                                              |              |
| 29 |     |                       |                                                              |              |
| 30 |     |                       |                                                              |              |
| 31 |     |                       |                                                              |              |
| 32 |     |                       |                                                              |              |
| 33 |     |                       |                                                              |              |
| 34 |     |                       |                                                              |              |
| 35 |     |                       |                                                              |              |
| 36 |     |                       |                                                              |              |
| 37 |     |                       |                                                              |              |
| 38 |     |                       |                                                              |              |
| 39 |     |                       |                                                              |              |
| 40 |     |                       |                                                              |              |
| 41 |     |                       |                                                              |              |
| 42 |     |                       |                                                              |              |
| 43 |     |                       |                                                              |              |
| 44 |     |                       |                                                              |              |
| 45 |     |                       |                                                              |              |
| 46 |     |                       |                                                              |              |
| 47 |     |                       |                                                              |              |
| 48 |     |                       |                                                              |              |
| 49 |     |                       |                                                              |              |
| 50 |     |                       |                                                              |              |
| 51 |     |                       |                                                              |              |
| 52 |     |                       |                                                              |              |
| 53 |     |                       |                                                              |              |
| 54 |     |                       |                                                              |              |
| 55 |     |                       |                                                              |              |
| 56 |     |                       |                                                              |              |
| 57 |     |                       |                                                              |              |
| 58 |     |                       |                                                              |              |
| 59 |     |                       |                                                              |              |
| 60 |     |                       |                                                              |              |

# BMJ Open

## A cross-sectional study of national patient groups in Canada to examine their disclosure of relationships with pharmaceutical companies

|                                 |                                                                                                                                                                                                                                                                                                                                                                                                                                          |
|---------------------------------|------------------------------------------------------------------------------------------------------------------------------------------------------------------------------------------------------------------------------------------------------------------------------------------------------------------------------------------------------------------------------------------------------------------------------------------|
| Journal:                        | <i>BMJ Open</i>                                                                                                                                                                                                                                                                                                                                                                                                                          |
| Manuscript ID                   | bmjopen-2021-055287.R1                                                                                                                                                                                                                                                                                                                                                                                                                   |
| Article Type:                   | Original research                                                                                                                                                                                                                                                                                                                                                                                                                        |
| Date Submitted by the Author:   | 15-Dec-2021                                                                                                                                                                                                                                                                                                                                                                                                                              |
| Complete List of Authors:       | Lexchin, Joel; York University Faculty of Health, School of Health Policy and Management; University of Toronto Faculty of Medicine, Department of Family and Community Health<br>Batt, Sharon; Dalhousie University, Bioethics<br>Goldberg, Devorah; York University Faculty of Graduate Studies, School of Health Policy and Management<br>Shnier, Adrienne; York University Faculty of Health, School of Health Policy and Management |
| <b>Primary Subject Heading</b>: | Health policy                                                                                                                                                                                                                                                                                                                                                                                                                            |
| Secondary Subject Heading:      | Health economics                                                                                                                                                                                                                                                                                                                                                                                                                         |
| Keywords:                       | Health policy < HEALTH SERVICES ADMINISTRATION & MANAGEMENT, MEDICAL ETHICS, Health economics < HEALTH SERVICES ADMINISTRATION & MANAGEMENT                                                                                                                                                                                                                                                                                              |
|                                 |                                                                                                                                                                                                                                                                                                                                                                                                                                          |

SCHOLARONE™  
Manuscripts



I, the Submitting Author has the right to grant and does grant on behalf of all authors of the Work (as defined in the below author licence), an exclusive licence and/or a non-exclusive licence for contributions from authors who are: i) UK Crown employees; ii) where BMJ has agreed a CC-BY licence shall apply, and/or iii) in accordance with the terms applicable for US Federal Government officers or employees acting as part of their official duties; on a worldwide, perpetual, irrevocable, royalty-free basis to BMJ Publishing Group Ltd ("BMJ") its licensees and where the relevant Journal is co-owned by BMJ to the co-owners of the Journal, to publish the Work in this journal and any other BMJ products and to exploit all rights, as set out in our [licence](#).

The Submitting Author accepts and understands that any supply made under these terms is made by BMJ to the Submitting Author unless you are acting as an employee on behalf of your employer or a postgraduate student of an affiliated institution which is paying any applicable article publishing charge ("APC") for Open Access articles. Where the Submitting Author wishes to make the Work available on an Open Access basis (and intends to pay the relevant APC), the terms of reuse of such Open Access shall be governed by a Creative Commons licence – details of these licences and which [Creative Commons](#) licence will apply to this Work are set out in our licence referred to above.

Other than as permitted in any relevant BMJ Author's Self Archiving Policies, I confirm this Work has not been accepted for publication elsewhere, is not being considered for publication elsewhere and does not duplicate material already published. I confirm all authors consent to publication of this Work and authorise the granting of this licence.

1  
2  
3 **A cross-sectional study of national patient groups in Canada to examine their disclosure**  
4 **of relationships with pharmaceutical companies**  
5

6 Joel Lexchin (0000-0001-5120-8029), Sharon Batt (0000-0003-0612-0513), Devorah  
7 Goldberg, Adrienne Shnier  
8

9  
10 Joel Lexchin, professor emeritus, Faculty of Health (School of Health Policy and  
11 Management, York University), 4700 Keele St., Toronto, ON, Canada M3J 1P3  
12

13 Sharon Batt, adjunct professor, Department of Bioethics, Dalhousie University, 5849  
14 University Ave, Room C315, PO Box 15000, Halifax, NS, Canada B3H 4R2  
15

16  
17 Devorah Goldberg, graduate student, Faculty of Graduate Studies (Graduate Program in  
18 Health), York University, 4700 Keele St., Toronto, ON, Canada M3J 1P3  
19

20  
21 Adrienne Shnier, adjunct professor, Faculty of Health (School of Health Policy and  
22 Management, York University), 4700 Keele St., Toronto, ON, Canada M3J 1P3  
23

24 **Correspondence:**

25  
26 Dr. Joel Lexchin  
27 School of Health Policy and Management  
28 York University  
29 4700 Keele St.  
30 Toronto, ON, Canada M3J 1P3  
31 Tel: +416-209-4885  
32 Email: jlexchin@yorku.ca  
33  
34  
35  
36  
37  
38  
39  
40  
41  
42  
43  
44  
45  
46  
47  
48  
49  
50  
51  
52  
53  
54  
55  
56  
57  
58  
59  
60

## Structured Summary

### Objectives

This study investigates the information and policies that Canadian patient groups post on their publicly available websites about their relationships with pharmaceutical companies.

### Design

Cross-sectional study.

### Setting

Canadian national patient groups.

### Participants

Ninety-seven patient groups with publicly available websites.

### Interventions

Each patient group was contacted by email. Information from patient groups' websites was collected about: total annual revenue for the latest fiscal year, year revenue was reported, revenue from pharmaceutical company donors, purpose of the donation, presence of donors' logos on the website and hyperlinks to donors' websites, previous and current employment information about board members and staff, external audits about the group's finances, and whether the group endorses products made by donors. Analysis of publicly available policies looking at: board and/or advisory board, acceptance of donations and revenue generation, independence of decision-making, endorsements, assistance to and/or interactions between patient members from a donor or another company/person acting on behalf of a donor and audits/monitoring/compliance.

### Primary and secondary outcome measures

Number of patient groups posting information on their websites about their relationships with pharmaceutical companies; the presence and contents of patient group policies covering different topics about relationships with pharmaceutical companies.

## Results

Fifty-three (54.6%) of 97 groups reported donations from pharmaceutical companies. Forty-one (42.3%) groups showed the logos of pharmaceutical companies on their websites and 22 (53.7%) had hyperlinks to pharmaceutical company websites. Twenty-five (25.8%) groups endorsed pharmaceutical products produced by brand-name companies that had donated to the groups. Twenty-six (26.8%) groups had policies that dealt with relations with pharmaceutical companies.

## Conclusions

Pharmaceutical industry funding of the included patient groups was frequent. Despite this, relatively little information was provided on patient group websites about their relationships with pharmaceutical companies. Only 26 out of 97 groups had publicly available policies that directly dealt with their relationships with pharmaceutical companies.



## Article Summary

### *Strengths and limitations of this study*

- This is the first Canadian study to examine patient groups' disclosure of their relationships with pharmaceutical companies.
- National patient groups were identified from lists of groups registered to comment on national and provincial drug funding decisions.
- A novel data extraction form was developed based on previous surveys and was pilot tested and revised based on comments from experts in the field.
- Our methodology could not distinguish between groups that failed to disclose industry funding and those that received no industry funding.
- Some national patient groups may not have been included because they lacked a website or were not registered to comment on drug funding decisions at the time our list was compiled.

## Introduction

Patient groups serve an important function within the healthcare system for their members with a specific condition, providing information, education and support, contact with others facing the same health condition and assistance in navigating the health care system. Within this mandate, they often lobby Health Canada, the federal drug regulator, to approve new drugs and provincial governments for specific products to be funded for their membership.<sup>1 2</sup>

Since the Canadian federal government rolled back funding of patient groups in the mid 1990s<sup>3</sup> groups have sought new sources of revenue. Many patient groups receive money from pharmaceutical companies. This source of revenue has created concerns about a conflict of interest (COI) between corporate sponsors with a vested interest in supporting product sales and the patient groups and the potential for groups to adopt positions that favour their funders. Some groups have lobbied provincial governments to have their sponsors' drugs included on provincial formularies.<sup>4 5</sup> Patient groups are able to make submissions to the Common Drug Review and the pan-Canadian Oncology Drug Review, both part of the Canadian Agency for Drugs and Technology in Health (CADTH), about whether these agencies should recommend that provincial drug plans fund medications. Between 2013 and 2018, these evaluations almost always supported funding the drug, whether the groups had a financial conflict with the company making the drug, a conflict with another company or no conflict with any company.<sup>6</sup>

In addition to the widespread concerns in health policy about pharmaceutical industry funding,<sup>7</sup> financial transparency is an important value in the non-profit sector, which depends heavily on donations, volunteer labour and public trust.<sup>7 8</sup> Furthermore, non-profit

1  
2  
3 organisations with registered charity status are indirectly subsidized by taxpayers and thus  
4  
5 have a public responsibility to be open about their finances.  
6  
7  
8  
9

10 No study has systematically investigated how transparent Canadian patient organisations that  
11  
12 participate in drug funding assessments are about their relationships with the pharmaceutical  
13  
14 industry and how they report financial information; for example, whether they report  
15  
16 receiving donations from pharmaceutical companies, and whether they have policies to guide  
17  
18 their relationships with their pharmaceutical company donors. While there are other possible  
19  
20 approaches to retrieving information on these and related topics, notably disclosures from  
21  
22 companies, if they exist,<sup>9-11</sup> and interviews with patient group members,<sup>4</sup> we focus on the  
23  
24 information on groups' publicly available websites. Unlike Australia and several European  
25  
26 countries where industry self-regulation requires companies to disclose their funding to  
27  
28 patient groups, in Canada only Ontario has passed such a law and it lies dormant under the  
29  
30 current government.<sup>12</sup> Websites are the most easily accessible source of information for  
31  
32 interested parties and are the method most patient groups use to make their financial accounts  
33  
34 available to the public.  
35  
36  
37  
38  
39  
40  
41

42 Transparency in reporting is a first step to enabling all affected parties (patient group  
43  
44 members, the medical community, governments, policy makers and funders) to assess the  
45  
46 independence of groups from these funding sources and the objectivity of the information  
47  
48 that they provide. In determining the transparency of Canadian patient groups, we adapted the  
49  
50 survey methodology used by researchers in other jurisdictions<sup>13-18</sup> to investigate the  
51  
52 transparency of how patient groups report their funding links generally and in particular with  
53  
54 pharmaceutical companies. We assessed key information about the organization: how much  
55  
56 financial information patient groups post on their websites – specifically, information about  
57  
58  
59  
60

1  
2  
3 donations and the use of donations, the composition and employment histories of their boards  
4 and staff. Equally important, we examine whether the groups have COI policies to guide their  
5 interactions with companies.  
6  
7  
8  
9

## 10 11 12 **Methods**

### 13 14 *List of patient groups*

15  
16 In the absence of a single national list of Canadian patient groups that advocate on drug  
17 policies, on April 22-23, 2019 we searched the websites of all provincial and territorial drug  
18 plans (Supplementary File 1) using the terms “registered”, “patient group”, “advocacy  
19 group”, “patient engagement” and “patient organization” to see if they had a list of patient  
20 groups that provided input to their decision-making processes. Only Ontario and British  
21 Columbia (BC) had such lists: BC Pharmacare registers groups that may provide public input  
22 into its drug coverage review process (121 groups)<sup>19</sup> and the Ontario Ministry of Health and  
23 Long-Term Care registers advocacy groups eligible to provide patient evidence submissions  
24 on drugs listed on the drug review schedule of the Ontario Public Drug Program (102  
25 groups).<sup>20</sup> Additional sources for patient groups were those registered with the pan-Canadian  
26 Oncology Drug Review, (44 groups)<sup>21</sup> and the membership of the Best Medicines Coalition,  
27 an alliance of patient advocates with a shared goal of gaining access to “safe and effective  
28 medicines that improve patient outcomes” (27 groups).<sup>22</sup> The decision to only include groups  
29 that were nationally based was made because of the limited resources available to our team.  
30  
31  
32  
33  
34  
35  
36  
37  
38  
39  
40  
41  
42  
43  
44  
45  
46  
47  
48  
49  
50

51 We removed duplicates from our list and limited the groups to those that met the following  
52 criteria: Canadian, national in nature, self-identified as patient groups and had an active  
53 website that we could search for information.  
54  
55  
56  
57  
58  
59  
60

### *Contacting patient groups*

In addition to gathering information on patient groups' websites, we contacted each patient group's communication contact or equivalent by email in the week of July 13, 2020 to ensure that our data collection would not miss any publicly available, relevant documents that were on their websites. (Supplementary File 2 provides a generic version of the email which was modified for each individual group.) The nature of the study was explained including that we were collecting only publicly available information, that while groups would be identified no individuals in those groups would be named and that all the information we collected would be placed in a publicly available website. In the email, we asked for documents on their websites that would help us determine how transparent groups are with respect to their relationship with donors: 1) the organization's criteria for accepting funding; 2) the organization's position on how funds from acceptable sources are used; 3) the organization's financial affiliations and donors, the sum per annum that the organization receives from those donors; and 4) the organization's board membership including the names of the board members, employment information, and whether there are any current or former pharmaceutical industry employees on the board. (Revenue Canada does not require registered charitable organizations to submit audited financial statements, but organizations need to file annual reports that include basic financial information along with a list of directors. These statements do not include the names of individual donors and the amount that they donated nor any background information about the directors.) If no response was received, a reminder email was sent out after 7 weeks. Any documents received were stored in a password protected web-based site.

### *Construction of data extraction form*

1  
2  
3 We initially identified research from our personal files and those of other experts on patient  
4 group relationships with industry and COI disclosure and developed a preliminary data  
5 collection tool.<sup>13-18</sup> This preliminary tool was then sent to 5 experts in the area (LB, AFB,  
6 QG, BJM, LP) and modified based on their comments. The resulting tool was then pilot  
7 tested by two authors (JL and AS) who independently abstracted information from 5  
8 Australian patient groups. Results were compared and the tool was modified based on this  
9 pilot test. It was then converted into REDCap, a data management tool. The same two authors  
10 carried out a second pilot test, using 5 Canadian patient groups and modified the tool one  
11 final time.  
12  
13  
14  
15  
16  
17  
18  
19  
20  
21  
22

### 23 24 25 26 *Data extraction*

27  
28 Using the final version of our REDCap tool, between September 2020 and April 2021 we  
29 extracted the following information, if it was available, from the group's website: total annual  
30 revenue for the latest fiscal year, year revenue was reported, revenue from pharmaceutical  
31 company donors, purpose of the donation, presence of donors' logos on the website and  
32 hyperlinks to donors' websites, previous and current employment information about board  
33 members and staff, external audits about the group's finances, and whether the group  
34 endorses products made by donors (Supplementary File 3).  
35  
36  
37  
38  
39  
40  
41  
42  
43  
44  
45  
46

47 We also examined websites for the presence of COI policies, codes and guidelines  
48 (collectively referred to as policies) that covered one or more of the following a priori defined  
49 content areas: board and/or advisory board, acceptance of donations and revenue generation,  
50 independence of decision-making, endorsements, assistance to and/or interactions between  
51 patient members from a donor or another company/person acting on behalf of a donor and  
52 audits/monitoring/compliance. Any policy potentially related to relationships with industry  
53  
54  
55  
56  
57  
58  
59  
60

1  
2  
3 donors was collected and assessed for relevancy; only those covering one or more of the  
4  
5 issues listed above were included in the analysis. If a policy was available, we recorded  
6  
7 whether specific information was present or absent, however, we did not evaluate the strength  
8  
9 of the policy (Supplementary File 4). To be eligible, the document had to be explicitly  
10  
11 identified as a policy. By-laws and legal documents were excluded.  
12  
13  
14  
15  
16

17 All four authors independently extracted information from the websites of 23-24 different  
18  
19 patient groups and each author did a secondary review of 5 additional websites. Groups of  
20  
21 two authors compared their evaluations for these 5 to ensure uniform extraction and then  
22  
23 compared information in extraction forms for 1 out of every 5 of the remaining groups.  
24  
25

26 Differences were resolved by consensus and if consensus could not be reached a third author  
27  
28 made the final decision.  
29  
30  
31  
32

33 Best Medicines Coalition (BMC) has a Code of Conduct Regarding Funding<sup>23</sup> that applies to  
34  
35 all its member groups. Consistent with our goal of examining only publicly available  
36  
37 information, we considered the code applicable to a group if it was posted on the group's  
38  
39 website or if the website had a hyperlink to the code. Similarly, if groups hyperlinked to other  
40  
41 codes or policies, such as the Canadian Consensus Framework for Ethical Collaboration<sup>24</sup>  
42  
43 we also considered those codes or policies as applicable to the group. If a group indicated on  
44  
45 its website that a code or policy was available on request, but the policy was unavailable  
46  
47 otherwise, we did not include it.  
48  
49  
50  
51  
52

### 53 *Data analysis*

54 We only report descriptive data in the form of the number and percent of groups with the  
55  
56 different types of information on their websites and with policies covering the different  
57  
58  
59  
60

1  
2  
3 aspects of relationships with pharmaceutical companies. To report our results, we  
4  
5 anonymized groups but their names, not linked to their responses, are available in  
6  
7  
8 Supplementary File 5.  
9

### 10 11 12 *Ethics statement*

13  
14 The Human Participants Review Committee of the York University Office of Research  
15  
16  
17 Ethics assessed our ethics application and replied that an approval certificate was not required  
18  
19 as this research was not subject to review.  
20  
21  
22

### 23 24 *Patient and public involvement*

25  
26  
27 Patient groups were contacted for information about their relationships with pharmaceutical  
28  
29 companies. There was no other patient or public involvement in this study.  
30  
31  
32

### 33 34 **Results**

35  
36 We initially identified 100 different groups that met our inclusion criteria and contacted all  
37  
38 100 by email, but during the study two groups merged and the websites of two other groups  
39  
40 disappeared leaving a sample of 97 groups (Figure 1) (Supplementary File 5). Eight groups  
41  
42 provided policies in response to our request, all of which were publicly available on their  
43  
44 websites except one that was publicly available on request from the group. (We did not  
45  
46 request that policy as we only wanted to analyze policies that were available on websites.)  
47  
48  
49 Fifteen groups responded but did not provide policies, an additional 14 groups specifically  
50  
51 stated that they did not want to be involved in the project and 60 groups did not reply.  
52  
53  
54

55  
56 Between the material that patient groups sent us directly and those we sourced from the  
57  
58 groups' websites, we collected 846 pieces of material (financial statements, documents,  
59  
60



1  
2  
3 policies, codes, reports) for analysis, with a median of 6.0 pieces per group (interquartile  
4  
5 (IQR) range 2.5, 10.5) (Supplementary File 5).  
6  
7  
8  
9

### 10 *Information on patient group websites*

11  
12 Fifty-three (54.6%) of 97 groups reported donations from pharmaceutical companies. The  
13  
14 remainder may have received donations or not reported them or did not receive any  
15  
16 donations. Only 1 of those 53 (1.9%) gave the total amount - \$516,000 (1.0%) out of total  
17  
18 revenue of \$54.1 million that it received from pharmaceutical companies. None of the other  
19  
20 groups reported the percent of its total revenue from companies. Nine (9.3%) groups gave  
21  
22 dollar ranges for donations, 17 (17.5%) gave the total value of donations from all sources but  
23  
24 none gave the exact amount of any single donation and 8 (8.2%) broke donations down into  
25  
26 separate categories (for example, corporate, foundations, individuals). Four (4.2%) disclosed  
27  
28 the purpose of donations.  
29  
30  
31  
32  
33  
34

35  
36 Fifty-one (52.6%) groups displayed the logos of their donors on the groups' websites,  
37  
38 including 41 (42.3%) that showed the logos of pharmaceutical companies. Thirty-one (60.8%  
39  
40 of those displaying logos) provided a hyperlink to their donors' websites (Table 1), including  
41  
42 22 (53.7%) groups that had hyperlinks to pharmaceutical company websites. Sixty-seven  
43  
44 (69.1%) of groups did not endorse any products, while 30 (30.9%) endorsed specific products  
45  
46 made by their donors, for example by expressing approval for their funding or availability,  
47  
48 including 25 (25.8%) groups that endorsed pharmaceutical products produced by  
49  
50 pharmaceutical companies that had donated to the groups. Twenty-eight patient groups'  
51  
52 websites did not contain any of the items listed in Table 1 and the median number of items  
53  
54 was 3.0 (interquartile range 0.0, 5.0) (Supplementary File 6).  
55  
56  
57  
58  
59  
60

**Table 1: Number of 97 patient groups (percent) reporting information about revenue and donations on their websites**

| Total annual revenue | Donations in general                 |                          |                                                                       |                      | Pharmaceutical company donations     |                                                  |                                                                 | Donor information on website |                              |                            |                              |
|----------------------|--------------------------------------|--------------------------|-----------------------------------------------------------------------|----------------------|--------------------------------------|--------------------------------------------------|-----------------------------------------------------------------|------------------------------|------------------------------|----------------------------|------------------------------|
|                      | Dollar range of individual donations | Total value of donations | Breakdown of total donations by source (e.g., corporate, individuals) | Purpose of donations | Number of groups reporting donations | Value of donations from pharmaceutical companies | Percent of total revenue from pharmaceutical company donations* | Donor logo                   |                              | Hyperlink to donor website |                              |
| 42 (43.3)            | 9 (9.3)                              | 17 (17.5)                | 8 (8.2)                                                               | 4 (4.2)              | 53 (54.6)                            | 1 (1.0)                                          | 1 (1.0)                                                         | Any donor                    | Pharmaceutical company donor | Any donor                  | Pharmaceutical company donor |
|                      |                                      |                          |                                                                       |                      |                                      |                                                  |                                                                 | 51 (52.6)                    | 41 (42.3)                    | 31 (32.0)                  | 20 (20.6)                    |

\*Calculated from information on website

Fifty-three (54.6%) groups had a brief synopsis about their board members but only 6 (6.2%) had detailed past employment histories. Seventeen groups (17.5%) reported that board members had current or past employment with a pharmaceutical company. Four (4.1%) groups gave pharmaceutical industry employment histories about their staff (Table 2). Supplementary File 7 shows the reporting pattern by individual patient groups.

**Table 2: Number of patient groups (percent) reporting employment information about board members and staff on their websites**

| Board members              |                |           | Staff                                               |           |                                            |         |
|----------------------------|----------------|-----------|-----------------------------------------------------|-----------|--------------------------------------------|---------|
| General employment history |                |           | Pharmaceutical industry employment history reported |           | Pharmaceutical employment history reported |         |
| None*                      | Brief synopsis | Detailed† | No                                                  | Yes       | No*                                        | Yes     |
| 38 (39.2)                  | 53 (54.6)      | 6 (6.2)   | 80 (82.5)                                           | 17 (17.5) | 93 (95.9)                                  | 4 (4.1) |

\*Board members (staff) not named or no information about employment history

†For example, year ranges with position, job title, employer

1  
2  
3 No groups had external (or internal) audited reports about their activities aside from financial  
4 statements, for example, whether they followed their policies regarding industry donations or  
5  
6 how these donations were used.  
7  
8  
9

### 10 11 12 *Patient group policies* 13

14 Twenty-six (26.8%) groups had publicly available policies on their websites that dealt with  
15 relations with pharmaceutical companies (Table 3), including 9 of the 20 members of BMC  
16 that were part of our sample. (In discussing the contents of those policies, we refer to the  
17 percent of groups with policies and not the percent of all groups.) None of the members of  
18 BMC referred to the BMC Code on their website. Policies on 7 separate topics were related  
19 to patient group-company relationships: composition and authority of the board, acceptance  
20 of donations and revenue generation, independence of decision-making, endorsements,  
21 material assistance to patient group members by a donor, other interactions between patient  
22 members of the group and a donor, and independent monitoring of activities and compliance  
23 with policies. The topic most frequently mentioned was acceptance of donations and revenue  
24 generation (16 (61.5%) groups) and the least covered topic was independent audits of  
25 finances, monitoring of activities and compliance with policies audits (5 (19.2%) groups).  
26  
27 The median number of topics covered per group with policies was 4 (IQR 2, 6).  
28  
29  
30  
31  
32  
33  
34  
35  
36  
37  
38  
39  
40  
41  
42  
43  
44  
45  
46  
47  
48  
49  
50  
51  
52  
53  
54  
55  
56  
57  
58  
59  
60

Table 3: Topics related to relationships with pharmaceutical companies covered by 26 patient group policies reported on websites

| Patient group number* | Topic of policy                    |                                                |                                 |              |                                                         |                                                                     |                                                                   |
|-----------------------|------------------------------------|------------------------------------------------|---------------------------------|--------------|---------------------------------------------------------|---------------------------------------------------------------------|-------------------------------------------------------------------|
|                       | Composition and authority of board | Acceptance of donations and revenue generation | Independence of decision-making | Endorsements | Material assistance to patient group members by a donor | Other interactions between patient members of the group and a donor | Independent monitoring of activities and compliance with policies |
| 1                     | x                                  | x                                              | x                               | x            | x                                                       |                                                                     |                                                                   |
| 2                     | x                                  | x                                              | x                               | x            | x                                                       | x                                                                   | x                                                                 |
| 3                     | x                                  | x                                              | x                               | x            | x                                                       |                                                                     |                                                                   |
| 4                     | x                                  | x                                              | x                               | x            | x                                                       | x                                                                   | x                                                                 |
| 5                     |                                    |                                                |                                 |              |                                                         |                                                                     |                                                                   |
| 6                     |                                    |                                                |                                 |              |                                                         |                                                                     |                                                                   |
| 7                     |                                    |                                                |                                 |              |                                                         |                                                                     |                                                                   |
| 8                     |                                    | x                                              |                                 | x            |                                                         | x                                                                   | x                                                                 |
| 9                     |                                    | x                                              | x                               | x            |                                                         |                                                                     |                                                                   |
| 10                    |                                    | x                                              | x                               | x            |                                                         |                                                                     |                                                                   |
| 11                    |                                    | x                                              | x                               | x            |                                                         |                                                                     |                                                                   |
| 12                    | x                                  | x                                              | x                               | x            | x                                                       |                                                                     |                                                                   |
| 13                    |                                    | x                                              | x                               | x            | x                                                       | x                                                                   |                                                                   |
| 14                    | x                                  | x                                              |                                 |              |                                                         |                                                                     |                                                                   |
| 15                    |                                    | x                                              | x                               | x            |                                                         |                                                                     |                                                                   |
| 16                    | x                                  | x                                              | x                               | x            |                                                         | x                                                                   |                                                                   |
| 17                    |                                    |                                                |                                 |              |                                                         |                                                                     |                                                                   |
| 18                    | x                                  | x                                              | x                               | x            | x                                                       | x                                                                   | x                                                                 |
| 19                    |                                    |                                                |                                 | x            |                                                         |                                                                     |                                                                   |
| 20                    |                                    |                                                |                                 |              |                                                         |                                                                     |                                                                   |

|                  |           |           |           |           |          |          |          |
|------------------|-----------|-----------|-----------|-----------|----------|----------|----------|
| <b>21</b>        | x         |           |           |           |          |          |          |
| <b>22</b>        | x         | x         |           |           | x        |          |          |
| <b>23</b>        |           |           | x         |           |          |          |          |
| <b>24</b>        |           |           |           |           |          | x        |          |
| <b>25</b>        |           | x         |           | x         |          |          | x        |
| <b>26</b>        | x         |           |           |           |          |          |          |
| <b>Total (%)</b> | 11 (42.3) | 16 (61.5) | 13 (50.0) | 15 (57.7) | 8 (30.8) | 7 (26.9) | 5 (19.2) |

\*Patient groups have been anonymized

Table 4 provides details about how many of the 26 groups with publicly available policies regulated individual aspects of each of the 7 topics referred to above. For example, “Composition and authority of board” asked whether the policy covered 5 different aspects of the relationship but in Table 4 we only present numbers for 2 of these aspects. Neither of the three groups that have policies covering employment of board members required their current or previous employment to be made public on the group’s website. One group prohibited people who currently or previously worked for any donor from being on the board, while 2 allowed this.

**Table 4: Topics of relationships with pharmaceutical companies covered by policies on websites of 26 patient groups**

| Particular topic of relationship covered by policy                                                                          | Number of groups with policy mentioning topic | Policy positive about topic | Policy not positive about topic |
|-----------------------------------------------------------------------------------------------------------------------------|-----------------------------------------------|-----------------------------|---------------------------------|
| <b><i>Composition and authority of board</i></b>                                                                            |                                               |                             |                                 |
| Current or previous employment of board members should be made public                                                       | 0                                             | 0                           | 0                               |
| Board membership allowed for people who currently or previously worked for a donor                                          | 3                                             | 2                           | 1                               |
| <b><i>Acceptance of donations and revenue generation</i></b>                                                                |                                               |                             |                                 |
| Source of donations should be made public                                                                                   | 6                                             | 6                           | 0                               |
| Amount of donations should be made public                                                                                   | 0                                             | 0                           | 0                               |
| Purpose of donations should be made public                                                                                  | 0                                             | 0                           | 0                               |
| Donations can be tied to donor-initiated project                                                                            | 10                                            | 5                           | 5                               |
| Donations require approval by board or executive director                                                                   | 11                                            | 5                           | 6                               |
| <b><i>Independence of decision-making</i></b>                                                                               |                                               |                             |                                 |
| Group has total independence in decision-making                                                                             | 13                                            | 13                          | 0                               |
| Donors allowed to directly organize seminars, lectures, projects or meetings                                                | 2                                             | 1                           | 1                               |
| <b><i>Endorsements</i></b>                                                                                                  |                                               |                             |                                 |
| Names of donors and/or their logos can be displayed on group’s website except to identify donor and amount of money donated | 8                                             | 4                           | 4                               |

|                                                                                                                                                                                         |    |   |    |
|-----------------------------------------------------------------------------------------------------------------------------------------------------------------------------------------|----|---|----|
| Endorsements of products and/or companies allowed                                                                                                                                       | 14 | 3 | 11 |
| Hyperlinks to donors' websites allowed                                                                                                                                                  | 4  | 4 | 0  |
| Patient group can directly or indirectly cooperate with companies in lobbying, testifying, addressing legislators, regulators, or policymakers, writing articles or policy briefs, etc. | 7  | 4 | 3  |
| <b><i>Material assistance to patient group members by a donor</i></b>                                                                                                                   |    |   |    |
| Donor allowed to directly pay for conference travel and accommodation for group representatives and participants                                                                        | 1  | 1 | 0  |
| Donor allowed to directly pay staff salary or provide staff support for group                                                                                                           | 2  | 1 | 1  |
| <b><i>Other interactions between patient members of group and donor</i></b>                                                                                                             |    |   |    |
| Donor allowed to provide information to patient members of group about products donor makes                                                                                             | 4  | 2 | 2  |
| Donor allowed to access membership data or membership lists                                                                                                                             | 2  | 1 | 1  |
| Donor allowed to provide patient group members with advocacy materials                                                                                                                  | 3  | 1 | 2  |
| Donor allowed to provide gifts of noneducational value to patient group members                                                                                                         | 1  | 0 | 1  |
| Donor allowed to provide information to patient group members about policies or positions adopted or suggested by the donor                                                             | 1  | 0 | 1  |
| <b><i>Independent monitoring of activities and compliance with policies</i></b>                                                                                                         |    |   |    |
| Monitoring of compliance with group's policies                                                                                                                                          | 3  | 0 | 3  |
| Actions if group is not compliant with its policies                                                                                                                                     | 2  | 1 | 1  |
| Audit of what activities donor money has been spent on                                                                                                                                  | 2  | 1 | 1  |
| Public availability of results of audits, monitoring, compliance                                                                                                                        | 2  | 0 | 2  |

Sixteen (61.5%) groups had policies about all donations, but only 6 (23.1%) of these policies stated that the source of donations had to be made public and no group required public reporting of the amount of donations. Similarly, no group required that the purpose of donations be publicly disclosed. Five (19.2%) groups did not allow donations to be tied to a donor-initiated project and 5 (19.2%) groups did allow this type of donation.



1  
2  
3  
4  
5  
6 Thirteen (50%) groups had policies that covered group independence and all stated that the  
7 group had total independence in decision-making. However, only 2 (7.7%) groups dealt with  
8 whether donors are allowed to directly organize seminars, lectures, projects or meetings (1  
9 permitted such activities, the other did not).

10  
11  
12  
13  
14  
15  
16  
17 The policies of 15 (57.7%) groups covered endorsements and the display of donors' names  
18 and logos. Four (15.4%) groups did allow and 4 (15.4%) did not allow the name and/or logo  
19 of donors to be listed on their websites except to identify the donor and the amount of money  
20 that the donor gave. Eleven (42.3%) groups did not allow endorsements of products and/or  
21 companies while 3 (11.5%) did. Four (15.4%) groups allowed hyperlinks to donors' websites.

22  
23  
24  
25  
26  
27  
28  
29  
30  
31 Eight (30.8%) groups had policies that regulated material assistance to patient group  
32 members by a donor and 6 (23.1%) groups had policies on other types of interactions  
33 between patient members of the group and donor. In the case of the former, 1 (3.8%) group  
34 allowed donors to directly pay for conference travel and accommodation for group  
35 representatives and participants and 2 (7.7%) groups had policies covering whether donors  
36 were allowed to directly pay staff salary or provide staff support for the group (1 = yes, 1 =  
37 no). In the case of the latter, 2 (7.7%) groups did, and 2 (7.7%) groups did not allow donors  
38 to provide information to patient members of the group about products the donor  
39 manufactures and 2 (7.7%) groups controlled whether donors were allowed to access  
40 membership data or membership lists (1 = yes, 1 = no).

41  
42  
43  
44  
45  
46  
47  
48  
49  
50  
51  
52  
53  
54  
55  
56 Three (11.5%) groups mentioned that there was no monitoring of compliance with the  
57 group's policies, while 2 (7.7%) groups had policies about actions that could be taken if the  
58  
59  
60

1  
2  
3 group was not compliant with its policies (1 = action would be taken, 1 = no action would be  
4 taken). Two (7.7%) groups mentioned whether there was an audit of the activities on which  
5  
6 donor money had been spent (1 = audit, 1 = no audit).  
7  
8  
9  
10

## 11 **Discussion**

12  
13  
14 In general, we found that pharmaceutical industry funding of the included patient groups was  
15 frequent, with over half (54.6%) publicly declaring on their websites that they had received  
16 donations from companies in this sector. Despite this, relatively little information was  
17 provided on patient group websites about their relationships with pharmaceutical companies.  
18  
19 Only a single group reported the total amount of revenue from this source, none gave the  
20 exact amount from individual donors, and only 8 groups stated the purpose of the donations.  
21  
22 The employment history of people on patient group boards was typically not given, making it  
23 impossible to determine if they had a past or present history of working for a pharmaceutical  
24 company. Similarly, only 4 groups provided employment histories of their staff. On-the-other  
25 hand, some practices were common.  
26  
27  
28  
29  
30  
31  
32  
33  
34  
35  
36  
37  
38  
39

40 Over 40% of the groups (41 out of 97) displayed the logos of pharmaceutical company  
41 donors on their websites including 22 groups that hyperlinked to pharmaceutical company  
42 websites. The use of logos is ambiguous and could be interpreted as transparency;  
43  
44 alternatively, the image of logos on a site could be interpreted as promotion for the company  
45 in question, especially if a link brings a patient to the company's web page, which might  
46  
47 contain information about a new treatment for the patient's condition.  
48  
49  
50  
51  
52  
53  
54  
55  
56  
57  
58  
59  
60

1  
2  
3 Collectively, our observations can be seen as an indication that groups are not committed to  
4 being transparent about their relationships with pharmaceutical companies and/or are too  
5  
6 closely tied to those companies.  
7  
8  
9

10  
11  
12 That message about relationships is reinforced in our observation that only 26 out of 97  
13  
14 groups had publicly available policies on their websites that directly dealt with their  
15  
16 relationships with pharmaceutical companies. Even when groups did have such policies,  
17  
18 those policies often did not cover key aspects of these relationships. For example, only half of  
19  
20 the 26 policies stated that the group had complete independence of decision-making and no  
21  
22 group's policy covered current or previous employment of board members. Worryingly, an  
23  
24 even smaller minority of groups had policies that dealt with topics such as material assistance  
25  
26 to patient group members by a donor (2 of 26 policies) and having independent monitoring of  
27  
28 activities and compliance with policies (3 of 26 policies).  
29  
30  
31  
32  
33  
34

35  
36 On-the-one hand, our results show that in the absence of publicly available policies most  
37  
38 groups do not make key information public about relationships with pharmaceutical  
39  
40 companies including the purpose of donations that they received. But our findings also  
41  
42 suggest that, in practice, some groups may follow unwritten policies. For example, although  
43  
44 product endorsements were only dealt with in 14 policies, 67 groups did not have any product  
45  
46 endorsements on their websites.  
47  
48  
49  
50

51  
52 With some variations, our findings are broadly in line with studies from other countries that  
53  
54 analyzed information and policies on patient group websites. Ball and colleagues studied  
55  
56 patient organizations in Australia, Canada, South Africa, the United Kingdom and the United  
57  
58 States (US). Corporate donations were acknowledged in only 7 out of 37 annual reports and  
59  
60

1  
2  
3 none of the groups gave enough information to show the proportion of their funding coming  
4 from pharmaceutical companies;<sup>13</sup> our results found even fewer groups gave enough  
5 information (1 out of 97 groups). In another study, 36 (52.9%) out of 68 Australian groups  
6 that received industry funding disclosed the use that they made of the money,<sup>25</sup> whereas only  
7 4.2% did so in our study. Three out of 157 Italian patient and consumer groups (6%) reported  
8 the amount of funding from pharmaceutical companies, 25 (54%) reported the activities  
9 funded but none reported the proportion of income derived from drug companies.<sup>26</sup> None of  
10 24 American dermatology organizations reported the exact amount or use of donations.<sup>17</sup> A  
11 systematic review that included 5 studies that examined patient groups' websites found that a  
12 median of 75% reported receiving funding from pharmaceutical companies<sup>9</sup> compared to  
13 54.6% in our study. Another 9 studies in the review reported that between 0% and 50% of  
14 groups disclosed the amount of funding that they received, between 0% and 6% of groups  
15 reported the proportion of their budget coming from company funding, and a median of 22%  
16 of organizations reported on how the funding was used.

17  
18  
19  
20  
21  
22  
23  
24  
25  
26  
27  
28  
29  
30  
31  
32  
33  
34  
35  
36  
37  
38 In the international study of patient groups by Ball and colleagues, one third of websites  
39 showed one or more company logos and/or had links to websites of pharmaceutical  
40 companies<sup>13</sup> compared to 22.7% (22 of 97 groups) in our study. Forty-nine out of 133  
41 Australian groups had company logos, web links or advertisements on their websites and 6  
42 had board members that were currently or previously employed by pharmaceutical  
43 companies.<sup>25</sup> Among members of the US National Health Council,<sup>27</sup> 24 of 47 patient  
44 advocacy organizations had policies that addressed institutional conflict of interest<sup>28</sup> while  
45 less than one-fifth of Australian groups had publicly available policies on corporate  
46 sponsorship.<sup>25</sup> In a systematic review, the prevalence estimates of organizational policies that  
47  
48  
49  
50  
51  
52  
53  
54  
55  
56  
57  
58  
59  
60

1  
2  
3 govern corporate sponsorship ranged from 2% to 64%.<sup>29</sup> In our case, 16.5% of groups had  
4  
5 policies about donations and revenue generation.  
6  
7  
8  
9

10 The fact that results from multiple jurisdictions spanning the period of time from 2003 to  
11  
12 2021 are so similar speaks to a number of issues. First, it indicates how pervasive the  
13  
14 relationships between patient groups and the pharmaceutical industry are. Second, it  
15  
16 demonstrates that the lack of patient groups' policies governing this relationship is  
17  
18 widespread and that patient groups, wherever they are located, do not see this absence as a  
19  
20 problem. Finally, the persistence of the results shows that [challenges to the status quo have](#)  
21  
22 [not produced any substantial movement in the behaviour of patient groups.](#)  
23  
24  
25  
26  
27

### 28 *Limitations*

29  
30 As Canada has no centralized database of industry funding of patient groups, we relied on  
31  
32 information reported on groups' websites about their pharmaceutical industry funding and we  
33  
34 had no way of verifying the accuracy of the information. It is difficult to know what time-  
35  
36 spans patient groups consider as relevant when disclosing funding. Some groups may  
37  
38 disclose corporate funding in the current fiscal year; others may include only the previous  
39  
40 year, and some may include more years. Some groups may have steady corporate income  
41  
42 from the same sources, whereas other may only receive intermittent donations from different  
43  
44 companies. We identified patient groups to include in our study based primarily on whether  
45  
46 they were national and provided advice to government institutions about funding new drugs.  
47  
48 However, this may constitute a biased sample of Canadian patient groups and other groups  
49  
50 may differ in terms of which information is made public and the extent of their policies. We  
51  
52 only looked at whether policies existed for certain topics and did not evaluate the strength of  
53  
54 the policies. Other documents may have covered areas that were of interest to us, but if these  
55  
56  
57  
58  
59  
60

1  
2  
3 documents were not identified as policies we may have missed them. Only 37 of the 97  
4  
5 groups that we contacted by email responded and out of those only 8 sent us publicly  
6  
7 available policies. Some websites were quite complex and the location of information varied  
8  
9 from one organization to another; in addition, we may have missed policies on the websites  
10  
11 of groups that did not respond or did not send us material. Some groups may have had non-  
12  
13 publicly available policies on relevant topics and those would not have been included.  
14  
15 Finally, we asked groups about their policies in 2019 and started collecting information from  
16  
17 their websites in September 2020. It is possible that some groups subsequently updated their  
18  
19 websites or policies, although we verified that the information was current to April 2021.  
20  
21  
22  
23  
24  
25

## 26 **Conclusion**

27  
28 In the past few decades, patient groups in Canada have evolved rapidly to play a  
29  
30 consequential policy role in the Common Drug Review, pan-Canadian Oncology Drug  
31  
32 Review, Quebec's Institut national d'excellence en santé et en services sociaux, and other  
33  
34 provincial and territorial drug programs that decide which drugs will be included on drug  
35  
36 formularies. By speaking from patients' experience, groups can add to our understanding of  
37  
38 patients' needs and suggest useful system changes, including in drug policy. However,  
39  
40 groups with funding from the very companies whose drugs are under review may be  
41  
42 influenced by their industry sponsors unconsciously,<sup>30</sup> through a complex process of  
43  
44 corrupted knowledge systems,<sup>31</sup> or through a transactional system of "asset exchange".<sup>32</sup>  
45  
46 While transparency does not protect a group against such influence, openness about funding  
47  
48 sources is a basic ethical responsibility in science, in democratic systems of governance, and  
49  
50 in non-profit organizations. Internationally, websites are the most common means of  
51  
52 information disclosure in non-profit organisations, but they are recognized as inadequate to  
53  
54 meet the standards of accountability the sector requires.<sup>8</sup>  
55  
56  
57  
58  
59  
60

1  
2  
3  
4  
5 Other than the law governing charitable organizations based in Canada, which makes few  
6 requirements for public reporting of corporate donations and specifically does not require  
7 organizations to declare the names of individual donors or the amount of the donations,  
8 patient groups are not answerable to any national regulatory or governing body. It is left to  
9 the groups themselves to decide what information they will reveal on their websites about  
10 corporate donations and whether they develop policies to guide their interactions with their  
11 donors. Our study found that most groups had no explicit publicly available policies guiding  
12 these interactions and that in general very limited information is disclosed.  
13  
14  
15  
16  
17  
18  
19  
20  
21  
22  
23  
24  
25

26 The inconsistencies we discovered are not surprising given the absence of external  
27 requirements and the varied histories, mandates and resources of the groups themselves. Each  
28 group exists to serve its particular patient constituency, not the public at large, and the  
29 absence of requirements for public accountability is not the fault of the organizations. A few  
30 groups have taken the initiative to adopt strong transparency policies in their relations with  
31 the pharmaceutical industry and we applaud the example they set.  
32  
33  
34  
35  
36  
37  
38  
39  
40  
41

42 Patient groups have an important role to play in the health care system as a voice for their  
43 membership. However, they need to act, and be seen to act, as independent voices for  
44 patients. Whether this is possible while engaged in relationships with the pharmaceutical  
45 industry is a question of active debate;<sup>33</sup> we agree with analysts who would have patient  
46 groups decrease, and ultimately end, their dependence on industry funding.<sup>34</sup> Unfortunately,  
47 while governments in Canada actively seek to engage patient groups in their policy  
48 processes, they do not provide them with funding to support these activities.<sup>35</sup> Those groups  
49 that have relationships with industry need to adopt a much more transparent approach to  
50  
51  
52  
53  
54  
55  
56  
57  
58  
59  
60

1  
2  
3 reporting on their relationships with these companies and to develop policies that clearly  
4  
5 define the extent of those relationships. We recommend as a first step to achieving this goal,  
6  
7 that groups convene a series of regional and national workshops, similar to one recently held  
8  
9 in Australia, to develop independent guidance for groups looking for assistance in enacting  
10  
11 sponsorship policies.<sup>36</sup>  
12  
13  
14  
15  
16  
17  
18  
19  
20  
21  
22  
23  
24  
25  
26  
27  
28  
29  
30  
31  
32  
33  
34  
35  
36  
37  
38  
39  
40  
41  
42  
43  
44  
45  
46  
47  
48  
49  
50  
51  
52  
53  
54  
55  
56  
57  
58  
59  
60

For peer review only



1  
2  
3 **Figure 1 caption:**

4  
5 **Selection of patient groups**  
6  
7  
8  
9  
10  
11  
12  
13  
14  
15  
16  
17  
18  
19  
20  
21  
22  
23  
24  
25  
26  
27  
28  
29  
30  
31  
32  
33  
34  
35  
36  
37  
38  
39  
40  
41  
42  
43  
44  
45  
46  
47  
48  
49  
50  
51  
52  
53  
54  
55  
56  
57  
58  
59  
60

For peer review only

## Acknowledgements

Drs. Lisa Bero, Adriane Fugh-Berman, Quinn Grundy, Barbara Jane Mintzes and Lisa Parker provided comments on initial versions of the data extraction tool. Drs. Barbara Jane Mintzes and Lisa Parker provided feedback on the manuscript.

## Contributorship statement

AS came up with the idea for this study. JL and AS developed the data extraction tool. JL, AS, SB and DG gathered and analyzed the data. JL wrote the first draft of the manuscript. AS, SB and DG revised the manuscript. JL, AS, SB, DG approved the final version of the manuscript.

## Competing interests

In 2017-2020, Joel Lexchin received payments for being on a panel at the American Diabetes Association, for talks at the Toronto Reference Library, for writing a brief in an action for side effects of a drug for Michael F. Smith, Lawyer and a second brief on the role of promotion in generating prescriptions for Goodmans LLP and from the Canadian Institutes of Health Research for presenting at a workshop on conflict-of-interest in clinical practice guidelines. He is currently a member of research groups that are receiving money from the Canadian Institutes of Health Research and the Australian National Health and Medical Research Council. He is a member of the Foundation Board of Health Action International and the Board of Canadian Doctors for Medicare. He receives royalties from University of Toronto Press and James Lorimer & Co. Ltd. for books he has written.

Sharon Batt has received payment for commissioned briefs related to patient advocacy and industry funding from the Canadian Federation of Nurses Unions and the Canadian Health Coalition. In 2018, she received royalties from UBC Press for a book on industry funding of

1  
2  
3 patient groups. She is a member of the executive of the Nova Scotia Health Coalition and a  
4  
5 member of Independent Voices for Safe and Effective Drugs.  
6  
7  
8  
9

10 Devorah Goldberg and Adrienne Shnier have no competing interests to declare.  
11

## 12 **Funding**

13  
14 This research received no specific grant from any funding agency in the public, commercial  
15  
16 or not-for profit sectors.  
17  
18

## 19 **Data sharing statement**

20  
21 The raw data used for analysis of information on patient groups' websites and their policies is  
22  
23 available on request.  
24  
25  
26  
27  
28  
29  
30  
31  
32  
33  
34  
35  
36  
37  
38  
39  
40  
41  
42  
43  
44  
45  
46  
47  
48  
49  
50  
51  
52  
53  
54  
55  
56  
57  
58  
59  
60

## References

1. Baggott R, Jones K. The voluntary sector and health policy: the role of national level health consumer and patients' organisations in the UK. *Social Science & Medicine* 2014;123:202-09.
2. Jones K, Baggott R, Allsop J. Influencing the national policy process: the role of health consumer groups. *Health Expectations* 2004;7:18-28.
3. Batt S. Health Advocacy Inc.: How Pharmaceutical Funding Changed the Breast Cancer Movement. Vancouver: UBC Press 2017.
4. Weeks C. When patients and drug makers align on a cause, whose best interests are at play? *Globe and Mail* 2016 January 28.
5. Goomansingh C. Patient groups fighting for coverage of pricey drugs get pharma funding: Global News; 2014 [Available from: <http://globalnews.ca/news/1690509/what-role-do-pharmaceutical-companies-play-in-gaining-support-for-theirdrugs/> accessed July 31 2018].
6. Lexchin J. Association between commercial funding of Canadian patient groups and their views about funding of medicines: an observational study. *PLoS One* 2019;14:e0212399.
7. De Jesus-Morales K, Prasad V. Closed financial loops: when they happen in government, they're called corruption; in medicine, they're just a footnote. *The Hastings Center Report* 2017;47(3):9-14. DOI:10.1002/hast.700
8. Ortega-Rodríguez C, Licerán-Gutiérrez A, Moreno-Albarracín A. Transparency as a key element in non-profit organizations: a systematic literature review. *Sustainability* 2020;20(14):5834. DOI:10.3390/su12145834

- 1  
2  
3 9. Khabsa J, Semaan A, El-Harakeh A, et al. Financial relationships between patient and  
4  
5 consumer representatives and the health industry: a systematic review. *Health*  
6  
7 *Expectations* 2019;23:483-95. DOI: 10.1111/hex.13013  
8  
9
- 10 10. Mulinari S, Martinon L, Jachiet P-A, et al. Pharmaceutical industry self-regulation and  
11  
12 non-transparency: country and company level analysis of payments to healthcare  
13  
14 professionals in seven European countries. *Health Policy* 2021;125:915-22.  
15  
16
- 17 11. Rickard E, Ozieranski P, Mulinari S. Evaluating the transparency of pharmaceutical  
18  
19 company disclosure of payments to patient organisations in the UK. *Health Policy*  
20  
21 2019;123:1244-50.  
22  
23
- 24 12. Owens B. Ontario delays implementation of pharma transparency rules. *CMAJ*  
25  
26 2019;191(8):E241-E42. doi: <https://doi.org/10.1503/cmaj.109-5718>  
27  
28
- 29 13. Ball D, Tisocki K, Herxheimer A. Advertising and disclosure of funding on patient  
30  
31 organization websites: a cross sectional survey. *BMC Public Health* 2006;6:201.  
32  
33
- 34 14. Hemminki E, Toiviainen H, Vuorenkoski L. Co-operation between patient organisations  
35  
36 and the drug industry in Finland. *Social Science & Medicine* 2010;70:1171-75.  
37  
38
- 39 15. Herxheimer A. Relationships between the pharmaceutical industry and patients'  
40  
41 organisations. *BMJ* 2003;326:1208-10.  
42  
43
- 44 16. Karas L, Feldman R, Bai G, et al. Pharmaceutical industry funding to patient-advocacy  
45  
46 organizations: a cross-national comparison of disclosure codes and regulation.  
47  
48 *Hastings International and Comparative Law Review* 2019;42:453-84.  
49
- 50 17. Li D, Singer S, Mostaghimi A. Prevalence and disclosure of potential conflicts of interest  
51  
52 in dermatology patient advocacy organizations. *JAMA Dermatology* 2019;155:460-  
53  
54 64. DOI:10.1001/jamadermatol.2018.5102  
55
- 56 18. McCoy M, Carniol M, Chockley K, et al. Conflicts of interest for patient-advocacy  
57  
58 organizations. *New England Journal of Medicine* 2017;376:880-85.  
59  
60

- 1  
2  
3  
4  
5  
6  
7  
8  
9  
10  
11  
12  
13  
14  
15  
16  
17  
18  
19  
20  
21  
22  
23  
24  
25  
26  
27  
28  
29  
30  
31  
32  
33  
34  
35  
36  
37  
38  
39  
40  
41  
42  
43  
44  
45  
46  
47  
48  
49  
50  
51  
52  
53  
54  
55  
56  
57  
58  
59  
60
19. British Columbia. Your voice 2021 [Available from:  
<https://www2.gov.bc.ca/gov/content/health/health-drug-coverage/pharmacare-for-bc-residents/drug-review-process-results/your-voice#patient-group> accessed April 22 2019.
  20. Ontario Ministry of Health and Long-Term Care. Patient evidence submissions 2018 [updated November 14. Available from:  
[https://www.health.gov.on.ca/en/pro/programs/drugs/patient\\_evidence/registered\\_advocacy\\_groups.aspx](https://www.health.gov.on.ca/en/pro/programs/drugs/patient_evidence/registered_advocacy_groups.aspx) accessed April 22 2019.
  21. CADTH. Number of patient groups registered with CADTH's pan-Canadian Oncology Drug Review program 2018 [Available from:  
<https://web.archive.org/web/20210228191917/https://www.cadth.ca/sites/default/files/pcodr/Submit%20%26%20Contribute/pcodr-registered-patientadgrps.pdf> accessed April 23 2019.
  22. Best Medicines Coalition. Coalition members 2019 [Available from:  
<https://bestmedicinescoalition.org/members/> accessed April 23 2019.
  23. Best Medicines Coalition. Code of conduct regarding funding for the Best Medicines Coalition and its members 2021 [Available from:  
<https://seureservercdn.net/198.71.233.39/fa4.f37.myftpupload.com/wp-content/uploads/2019/07/BMC-Code-of-Conduct-Regarding-Funding.pdf> accessed May 1 2021.
  24. Best Medicines Coalition, Health Charities Coalition of Canada, Canadian Medical Association, et al. Canadian consensus framework for ethical collaboration no date [Available from: [http://innovativemedicines.ca/wp-content/uploads/2016/06/IMC\\_CONCENSUS\\_2016\\_HR\\_nobleed.pdf](http://innovativemedicines.ca/wp-content/uploads/2016/06/IMC_CONCENSUS_2016_HR_nobleed.pdf) accessed June 7 2021.

- 1  
2  
3 25. Lau E, Fabbri A, Mintzes B. How do health consumer organisations in Australia manage  
4 pharmaceutical industry sponsorship? A cross-sectional study. *Australian Health*  
5 *Review* 2019;474-80. doi: 10.1071/AH17288  
6  
7  
8  
9  
10 26. Colombo C, Mosconi P, Villani W, et al. Patient organizations' funding from  
11 pharmaceutical companies: is disclosure clear, complete and accessible to the public?  
12 An Italian survey. *PLoS One* 2012;7:e34974. doi:10.1371/journal.pone.0034974  
13  
14  
15  
16  
17 27. Putting patients first: National Health Council; 2021 [Available from:  
18 <https://nationalhealthcouncil.org> accessed May 30 2021.  
19  
20  
21  
22 28. Brems J, McCoy M. A content analysis of patient advocacy organization policies  
23 addressing institutional conflicts of interest. *AJOB Empirical Bioethics*  
24 2019;10(4):215-21. DOI: 10.1080/23294515.2019.1670278  
25  
26  
27  
28  
29 29. Fabbri A, Parker L, Colombo C, et al. Industry funding of patient and health consumer  
30 organisations: systematic review with meta-analysis. *BMJ* 2020;368:l6925. doi:  
31 <http://dx.doi.org/10.1136/bmj.l6925>  
32  
33  
34  
35 30. Moore D, Loewenstein G. Self-interest, automaticity, and the psychology of conflict of  
36 interest. *Social Justice Research* 2004;17(2):189-202.  
37  
38  
39  
40 31. Sismondo S. Epistemic corruption, the pharmaceutical industry, and the body of medical  
41 science. *Frontiers in Research Metrics and Analytics* 2021 doi:  
42 <https://doi.org/10.3389/frma.2021.614013> [published Online First: March 8, 2021]  
43  
44  
45  
46 32. Parker L, Fabbri A, Grundy Q, et al. "Asset exchange"—interactions between patient  
47 groups and pharmaceutical industry: Australian qualitative study. *BMJ*  
48 2019;367:l6694. doi: <http://dx.doi.org/10.1136/bmj.l6694>  
49  
50  
51  
52  
53 33. Arie S, Mahony C. Should patient groups be more transparent about their funding? *BMJ*  
54 2014;349:g5892. doi: <https://doi.org/10.1136/bmj.g5892>  
55  
56  
57  
58  
59  
60

- 1  
2  
3 34. Moynihan R, Bero L. Toward a healthier patient voice: more independence, less industry  
4 funding. *JAMA Internal Medicine* 2017;177(3):350-51. doi:  
5  
6 10.1001/jamainternmed.2016.9179  
7  
8  
9  
10 35. Batt S. Who will support independent patients' groups? *BMJ* 2014 doi:  
11  
12 <https://www.bmj.com/content/349/bmj.g5892/rapid-responses> [published Online  
13  
14 First: October 5, 2014]  
15  
16  
17 36. Parker L, Brown A, Wells L. Building trust and transparency: health consumer  
18 organisation - pharmaceutical industry relationships. *Australian Health Review*  
19  
20 2021;45:393-94. doi: 10.1071/AH20206  
21  
22  
23  
24  
25  
26  
27  
28  
29  
30  
31  
32  
33  
34  
35  
36  
37  
38  
39  
40  
41  
42  
43  
44  
45  
46  
47  
48  
49  
50  
51  
52  
53  
54  
55  
56  
57  
58  
59  
60



1  
2  
3  
4  
5  
6  
7  
8  
9  
10  
11  
12  
13  
14  
15  
16  
17  
18  
19  
20  
21  
22  
23  
24  
25  
26  
27  
28  
29  
30  
31  
32  
33  
34  
35  
36  
37  
38  
39  
40  
41  
42  
43  
44  
45  
46  
47  
48  
49  
50  
51  
52  
53  
54  
55  
56  
57  
58  
59  
60

For peer review only

1  
2  
3  
4 Identification of patient groups (n = 294 in total):  
5

6 Registration with:

7 British Columbia Pharmacare (n = 121)

8 Ontario Drug Benefit Programs (n = 102)

9 panCanadian Oncology Drug Review (n = 44)

10  
11  
12 Membership:

13 Best Medicines Coalition (n = 27)  
14  
15

16  
17  
18  
19  
20  
21 Excluded:

22 Duplicates = 90

23 Not a national group = 88

24 No website or website not functional =  
25 10

26 Not a patient group = 5

27 Not a Canadian group = 3

28 Merger of two groups = 1  
29  
30  
31  
32  
33  
34  
35  
36

37 Included = 97  
38  
39  
40  
41  
42  
43  
44  
45  
46  
47  
48  
49  
50  
51  
52  
53  
54  
55  
56  
57  
58  
59  
60

## Supplementary File 1: Search for patient groups registered to make submissions

| Provincial/territorial drug plans | Website                                                                                                                                                                                                                                                                                                                     | Search date    |
|-----------------------------------|-----------------------------------------------------------------------------------------------------------------------------------------------------------------------------------------------------------------------------------------------------------------------------------------------------------------------------|----------------|
| Alberta                           | <a href="https://www.alberta.ca/drug-benefit-list-and-drug-review-process.aspx">https://www.alberta.ca/drug-benefit-list-and-drug-review-process.aspx</a>                                                                                                                                                                   | April 22, 2019 |
| British Columbia                  | <a href="https://www2.gov.bc.ca/gov/content/health/health-drug-coverage/pharmacare-for-bc-residents/drug-review-process-results/your-voice#patient-group">https://www2.gov.bc.ca/gov/content/health/health-drug-coverage/pharmacare-for-bc-residents/drug-review-process-results/your-voice#patient-group</a>               | April 22, 2019 |
| Manitoba                          | <a href="https://www.gov.mb.ca/health/pharmacare/">https://www.gov.mb.ca/health/pharmacare/</a>                                                                                                                                                                                                                             | April 22, 2019 |
| New Brunswick                     | <a href="https://www2.gnb.ca/content/gnb/en/departments/health/MedicarePrescriptionDrugPlan/NBDrugPlan.html">https://www2.gnb.ca/content/gnb/en/departments/health/MedicarePrescriptionDrugPlan/NBDrugPlan.html</a>                                                                                                         | April 22, 2019 |
| Newfoundland and Labrador         | <a href="https://www.gov.nl.ca/hcs/prescription/">https://www.gov.nl.ca/hcs/prescription/</a>                                                                                                                                                                                                                               | April 22, 2019 |
| Northwest Territories             | <a href="https://www.hss.gov.nt.ca/en/services/supplementary-health-benefits/extended-health-benefits-specified-disease-conditions">https://www.hss.gov.nt.ca/en/services/supplementary-health-benefits/extended-health-benefits-specified-disease-conditions</a>                                                           | April 22, 2019 |
| Nova Scotia                       | <a href="https://novascotia.ca/dhw/pharmacare/">https://novascotia.ca/dhw/pharmacare/</a>                                                                                                                                                                                                                                   | April 22, 2019 |
| Nunavut                           | <a href="http://66.240.131.202/en-ca/Provincial-Coverage/nunavut/drug-benefit-programs">http://66.240.131.202/en-ca/Provincial-Coverage/nunavut/drug-benefit-programs</a>                                                                                                                                                   | April 22, 2019 |
| Ontario                           | <a href="https://www.health.gov.on.ca/en/pro/programs/drugs/patient_evidence/registered_advocacy_groups.aspx">https://www.health.gov.on.ca/en/pro/programs/drugs/patient_evidence/registered_advocacy_groups.aspx</a>                                                                                                       | April 22, 2019 |
| Prince Edward Island              | <a href="https://www.princeedwardisland.ca/en/information/health-pei/drug-programs">https://www.princeedwardisland.ca/en/information/health-pei/drug-programs</a>                                                                                                                                                           | April 22, 2019 |
| Quebec                            | <a href="https://www.ramq.gouv.qc.ca/en/citizens/prescription-drug-insurance">https://www.ramq.gouv.qc.ca/en/citizens/prescription-drug-insurance</a>                                                                                                                                                                       | April 22, 2019 |
| Saskatchewan                      | <a href="https://www.saskatchewan.ca/residents/health/prescription-drug-plans-and-health-coverage/extended-benefits-and-drug-plan/saskatchewan-drug-plan">https://www.saskatchewan.ca/residents/health/prescription-drug-plans-and-health-coverage/extended-benefits-and-drug-plan/saskatchewan-drug-plan</a>               | April 22, 2019 |
| Yukon                             | <a href="https://yukon.ca/en/health-and-wellness/medical-professionals/find-drug-coverage-information">https://yukon.ca/en/health-and-wellness/medical-professionals/find-drug-coverage-information</a>                                                                                                                     | April 22, 2019 |
| Agencies, organizations           | Website                                                                                                                                                                                                                                                                                                                     | Search date    |
| Best Medicines Coalition          | <a href="https://bestmedicinescoalition.org/members/">https://bestmedicinescoalition.org/members/</a>                                                                                                                                                                                                                       | April 23, 2019 |
| pan-Canadian Oncology Drug Review | <a href="https://web.archive.org/web/20210228191917/https://www.cadth.ca/sites/default/files/pcodr/Submit%20%26%20Contribute/pcodr-registered-patientadgrps.pdf">https://web.archive.org/web/20210228191917/https://www.cadth.ca/sites/default/files/pcodr/Submit%20%26%20Contribute/pcodr-registered-patientadgrps.pdf</a> | April 23, 2019 |

## Supplementary File 2: Generic version of letter sent to patient groups

July XX, 2019

Dear Dr. XXX,

We are conducting a study on the funding of national Canadian patient groups. The purpose of this study is to examine how much money groups receive from sponsors, analyze the policies and affiliations of patient groups to determine the types of funding that are permitted, whether any conditions are associated with receipt of the funding, and how the money is used.

We are requesting:

1. Any publicly available policy documents that describe your organization's criteria for accepting funding. An example of this might be a document that describes the process by which donations are considered and which donations may be accepted or refused. If this information exists and is publicly accessible, please either provide the url for the documents or attach them in your response email.
2. Any publicly available policy documents that describe your organization's position on how funds from acceptable sources are used. If this information exists and is publicly accessible, please either provide the url for the documents or attach them in your response email.
3. Any publicly available statements on your website that describe your organization's financial affiliations and donors, as well as the sum per annum that the organization receives from those donors. If this information exists on your website, please send us the url for that webpage.
4. Any publicly available statements on your website that list your organization's board membership including the names of the board members, employment information, and whether there are any current or former industry employees on the board. If this information exists on your website, please send us the url for that webpage.

The only information being requested from you is publicly available policy documents and website urls. Since all of this information is publicly available it will not be kept confidential. Any final publication from this research will name the organizations involved and indicate that its communications contact or equivalent, director, or his/her delegate was contacted to provide the title and source of publicly available publications and websites, as requested above but no names of any individuals in the organization will be disclosed. Organizations that do not respond or provide any information will also be identified in any final publication. No individuals will be named. As per general journal policy all raw data will be deposited in a publicly accessible website. Should your organization wish a copy of any final publication we will be pleased to provide one to your organization.

1  
2  
3  
4 Please respond within one month of receipt of this email.  
5

6  
7 You can refuse to participate or withdraw from the study at any time without affecting  
8 the relationship with the researchers, York University or any group associated with this  
9 project.  
10

11 In the event that you withdraw from the study, all associated data collected (individual  
12 responses and non-public documents) will be immediately destroyed wherever possible.  
13 However, publicly available information will be retained regardless of whether you  
14 withdraw from the study.  
15

16  
17 There are no potential risks to participating in this study.  
18

19 You can contact Alison M. Collins-Mrakas, Senior Manager & Policy Advisor, Research  
20 Ethics at 416-736-5914 or [acollins@yorku.ca](mailto:acollins@yorku.ca) for further information.  
21

22  
23 The research has been reviewed and approved by the Human Participants Review Sub-  
24 committee and conforms to the standards of the Canadian Tri-Council Research Ethics  
25 guidelines.  
26

27 Sincerely,  
28

29  
30 Adrienne Shnier Ph.D., J.D.  
31 Adjunct Professor, School of Health  
32 Policy and Management  
33 York University  
34 Email: [ashnier@yorku.ca](mailto:ashnier@yorku.ca)  
35

30 Joel Lexchin MD  
31 Professor, School of Health Policy and  
32 Management  
33 York University  
34 E mail: [jlexchin@yorku.ca](mailto:jlexchin@yorku.ca)  
35

- 1
- 2
- 3
- 4 Logged in as **jlexchin** | Log out
- 5
- 6 My Projects
- 7 Project Home
- 8 Project Setup
- 9 Project status: **Production**
- 10
- 11
- 12 **Data Collection**
- 13
- 14 Manage Survey Participants
- 15 Record Status Dashboard
- 16 Add / Edit Records
- 17
- 18
- 19
- 20 Identification Number **101** [Select other record](#)
- 21
- 22 Data Collection Instruments:
- 23
- 24 **Part A: Data Extraction Tool for Patient**
- 25 **Group Website**
- 26
- 27 Part B: Data Extraction Tool for Patient
- 28 Group Policies
- 29
- 30 **Applications**
- 31
- 32 Calendar
- 33 Data Exports, Reports, and Stats
- 34 Data Import Tool
- 35 Data Comparison Tool
- 36 Logging
- 37 Field Comment Log
- 38 File Repository
- 39 User Rights and DAGs
- 40
- 41
- 42
- 43
- 44
- 45
- 46 **Help & Information**
- 47
- 48 Help & FAQ
- 49 Video Tutorials
- 50 Suggest a New Feature
- 51
- 52
- 53
- 54 [Contact REDCap administrator](#)
- 55
- 56
- 57
- 58
- 59
- 60

Actions: [Download PDF of instrument\(s\)](#) [Share instrument in the Library](#) [VIDEO: Basic data entry](#)

**Save Record**  
 Save and Continue  
 Save and go to Next Form  
**Save and Mark Response as Complete**

**Part A: Data Extraction Tool for Patient Group Website**

Adding new Identification Number 101

Identification Number 101

Name of patient group (to be anonymized later)  
 \* must provide value

Does the website/annual/financial report provide the annual revenue for a fiscal year?  
 Yes  
 No

Provide the fiscal year for which this data extraction applies.  
 If more than one year, choose most recent.

Provide the total annual revenue of the patient group for this fiscal year.

Does the website/annual/fiscal report provide total annual revenue from pharmaceutical and medical device donors, specifically?  
 Yes  
 No

What information does the website/annual/financial report provide regarding the source and amount of grants and/or donations for the most recent fiscal year?  
 None  
 Donor(s) only  
 Amount(s) only  
 Donor(s) and amount(s)

What information is provided about the donation amount(s)?  
 None  
 Range of amount  
 Exact amount  
 Percent of total donations by type of source (i.e., corporate vs. foundation vs. human donors)

Does the website make the purpose of each donation public (i.e., donation earmarked for...)?  
 Yes  
 No

Does the website provide information the amount used for each activity?  
 Yes  
 No

If exact value, category (i.e., gold, silver, bronze) or range (i.e., \$5000-9999) for donation amounts is available, provide.

Are donors' logos provided?  
 Yes  
 No

Are hyperlinks to donor websites provided?  
 No  
 Yes  
 Some

Does the website provide identities of the board members?  
 Yes  
 No

What information is provided about board members' employment?  
 None  
 Brief synopsis  
 Specific (i.e., year ranges with position title, employer details)

Does the employment information or synopsis for board members disclose any current or previous employment in the pharmaceutical or medical device industries?  
 No  
 Yes

Does the employment information or synopsis for staff (i.e., communications director, administrative staff) disclose any current or previous employment in the pharmaceutical or medical device industries?  
 Yes  
 No  
 Note: whether paid or volunteer

Does the website provide information on external audit reports?  
 Yes  
 No

List the criteria that are audited.

Does the patient group endorse any specific treatment or donor?  
 No  
 Treatment  
 Donor  
 Check all that apply

**Form Status**

Complete? **Incomplete**

**Save Record**  
 Save and Continue  
 Save and go to Next Form  
**Save and Mark Response as Complete**  
 -- Cancel --

Page 43 of 53

**REDCap**

Logged in as jlexchin | Log out

My Projects

Project Home

Project Setup

Project status: **Production**

**Data Collection**

Manage Survey Participants

Record Status Dashboard

Add / Edit Records

Identification Number **101** [Select other record](#)

Data Collection Instruments:

Part A: Data Extraction Tool for Patient Group Website

**Part B: Data Extraction Tool for Patient Group Policies**

**Applications**

Calendar

Data Exports, Reports, and Stats

Data Import Tool

Data Comparison Tool

Logging

Field Comment Log

File Repository

User Rights and DAGs

**Help & Information**

Help & FAQ

Video Tutorials

Suggest a New Feature

Contact REDCap administrator

**Patient Groups Study - PRODUCTION - JL (30-10-2020)**

VIDEO: Basic data entry

Save Record

Save and Continue

Save and Mark Response as Complete

Actions: [Download PDF of instrument\(s\)](#) [Share instrument in the Library](#)

**Part B: Data Extraction Tool for Patient Group Policies**

Adding new Identification Number 101

Identification Number: 101

Patient group name (to be anonymized later):

Does the patient group have a relevant publicly available policy?  Yes  No [reset](#)  
Policy document must be clearly identifiable as a policy/guidance document.

Do/es the policy document/s cover any of the following content areas?  Board and/or advisory board  Acceptance of donations and revenue generation  Independence of decision-making  Endorsements  Assistance to patient members from a donor, or another company/person acting on behalf of a donor  Interaction between donor, or another company/person acting on behalf of a donor, and patient members  Audits, monitoring, and compliance  None of the above  Other  
Choose all that apply. None of the above = Policy available, but does not address any of our categories.

Does the organization's policy state that the names of board members must be provided on its website?  No  Yes  No policy

Does the organization's policy allow people who currently work for a donor, or who have a financial relationship with a donor, to participate on an advisory board?  No  Yes  No policy

Does the organization's policy state that current and/or previous employment information for board members must be disclosed on its website?  No  Yes  No policy

Does the organization's policy allow people who previously worked for, or currently work for, or have a financial relationship with a donor, to participate on the executive body of the board of the organization?  No  Yes  No policy

Does the organization's policy require the board and/or executive director to approve donations prior to receipt?  No  Yes  No policy

Does the organization's policy provide any other regulation of board membership?   
Expand

Does the organization's policy state that the source of donations and amount must be disclosed publicly?  No  Yes, source  Yes, amount  Yes, source and amount  No policy

Does the organization's policy allow for the acceptance of grant or donation money that is contingent on a donor-initiated project?  No  Yes  No policy

Does the organization's policy permit the acceptance of grants from only particular donors?  No  Yes  No policy

Does the organization's policy state that the purpose of accepted donations must be publicly disclosed?  No  Yes  No policy

Does the organization's policy permit accepting money from exclusively a single donor?  No  Yes  No policy

Does the organization's policy allow only a fixed amount of its annual revenue to be provided by a single donor?  No  Yes  No policy

Does the organization's policy set a fixed limit on the percentage of its annual revenue that it will accept from donors in total?  No  Yes  No policy

Does the organization's policy allow for "sponsorship packages", i.e., what benefits donors get from donations of a certain amount (e.g., exhibit space, company's name on all room keys, etc.).  No  Yes  No policy

Does the organization's policy state that the organization has total independence in its decision making?  No  Yes  No policy

Does the organization's policy state that the patient group retains final and complete control over all decisions it makes, all materials, and pronouncements that carry its name?  No  Yes  No policy

Does the organization's policy allow for the name of any donor to be listed on its website under any circumstances, except to identify the name and/or logo of the donor and the amount of money received, i.e., for an endorsement?  No  Yes  No policy

Does the organization's policy allow for the endorsement of any specific treatment or any specific donor?  No  Yes  No policy

Does the organization's policy allow for a hyperlink to be provided to a donor's website?  No  Yes  No policy

Does the organization's policy allow for the patient group to directly or indirectly cooperate with companies in lobbying, testifying, addressing legislators, regulators, or policymakers, writing articles or policy briefs, etc. (e.g., submit its own letter and support donor's position)?  No  Yes  No policy

Does the organization's policy allow donors to directly organize seminars, lectures, projects, or meetings?  No  Yes  No policy

Does the organization's policy allow donors to directly provide funding for seminars, lectures, projects, or meetings?  No  Yes  No policy

Does the organization's policy allow donors to directly contribute to printing costs?  No  Yes  No policy

Does the organization's policy allow donors to directly plan/arrange recreational services, lodging or travel for representative of the organization or participants?  No  Yes  No policy

Does the organization's policy allow donors to directly pay for conference travel and accommodation for organization representatives or participants?  No  Yes  No policy

Does the organization's policy allow donors to directly sponsor research grants, study fellowships, internships, or other opportunities administered by the organization for people in the field?  No  Yes  No policy

Does the organization's policy allow donors to provide donations in kind, e.g., facilities, administration, training materials, books for libraries, website design?  No  Yes  No policy

Does the organization's policy allow donors to directly pay staff salaries or provide staff support?  No  Yes  No policy

Does the organization's policy allow for any other assistance from donors or other companies acting on behalf of donors?   
Expand

Does the organization's policy allow donors to provide information to patient group members about products that the donor makes?  No  Yes  No policy

Does the organization's policy allow donors to provide gifts of educational value to patient group members (e.g., webinars, books, brochures)?  No  Yes  No policy

Does the organization's policy allow for donors to provide gifts of non-educational value to patient group members?  No  Yes  No policy

Does the organization's policy allow donors to provide patient group members with advocacy materials?  No  Yes  No policy

Does the organization's policy allow donors to provide a nurse/social worker/etc. to assist patient group members with treatment?  No  Yes  No policy

Does the organization's policy allow donors to survey patient group members, access membership data or membership lists, or otherwise gain information about members?  No  Yes  No policy

Does the organization's policy allow donors to provide expert opinions about products or policies?  No  Yes  No policy

Does the organization's policy allow donors to provide opportunities to patient group members to learn about lobbying/advocacy techniques?  No  Yes  No policy

Does the organization's policy allow donors to encourage individual lobbying/advocacy activities for patient group members?  No  Yes  No policy

Does the organization's policy allow donors to provide information to patient group members about policies or positions adopted or suggested by the donor?  No  Yes  No policy

If the organization's policy regulates any other areas of interaction between patient group members and donors, list.   
Expand

Does the organization's policy provide for any independent monitoring of their policies?  No  Yes  No policy

Does the organization's policy provide for an independent audit regarding on what activities donor money has been spent?  No  Yes  No policy

Does the organization's policy provide for publicly available results of the independent monitoring?  No  Yes  No policy

Does the organization's policy provide for what happens if the organization is not compliant with its policies? (i.e., internal review if noncompliance.)  No  Yes  No policy

**Form Status**

Complete?

Save Record

Save and Continue

Save and Mark Response as Complete

-- Cancel --

**Supplementary File 5: Names of patient groups, websites and**

|  | <b>Name of group</b> | <b>Website</b> | <b>Notes</b> | <b>Number of pieces of information analyzed</b> |
|--|----------------------|----------------|--------------|-------------------------------------------------|
|--|----------------------|----------------|--------------|-------------------------------------------------|

|    |                                                           |                                                                                               |  |    |
|----|-----------------------------------------------------------|-----------------------------------------------------------------------------------------------|--|----|
| 1  | AboutFace Craniofacial Family Society                     | <a href="http://www.aboutface.ca">www.aboutface.ca</a>                                        |  | 3  |
| 2  | Advocacy for Canadian Childhood Oncology Research Network | <a href="http://www.curesforourkids.com">http://www.curesforourkids.com</a>                   |  | 4  |
| 3  | aHUS Canada/SHUa                                          | <a href="http://www.ahuscanada.org">www.ahuscanada.org</a>                                    |  | 8  |
| 4  | ALS Society of Canada                                     | <a href="https://www.als.ca">https://www.als.ca</a>                                           |  | 8  |
| 5  | Aplastic Anemia and Myelodysplasia Association of Canada  | <a href="http://www.aamac.ca">www.aamac.ca</a>                                                |  | 3  |
| 6  | Arthritis Consumer                                        | <a href="http://www.jointhealth.org">www.jointhealth.org</a>                                  |  | 15 |
| 7  | Asthma Canada                                             | <a href="https://asthma.ca">https://asthma.ca</a>                                             |  | 22 |
| 8  | Best Medicines Coalition                                  | <a href="https://bestmedicinescoalition.org">https://bestmedicinescoalition.org</a>           |  | 10 |
| 9  | Bladder Cancer Canada                                     | <a href="https://bladdercancercanada.org/en/">https://bladdercancercanada.org/en/</a>         |  | 8  |
| 10 | Brain Tumour Foundation of Canada                         | <a href="https://www.braintumour.ca">https://www.braintumour.ca</a>                           |  | 4  |
| 11 | Canadian Arthritis Patient Alliance                       | <a href="http://www.arthritispatient.ca">www.arthritispatient.ca</a>                          |  | 24 |
| 12 | Canadian Breast Cancer Network                            | <a href="https://www.cbcn.ca/en/">https://www.cbcn.ca/en/</a>                                 |  | 10 |
| 13 | Canadian Cancer                                           | <a href="http://www.cancer.ca">www.cancer.ca</a>                                              |  | 8  |
| 14 | Canadian Cancer Survivor Network                          | <a href="http://www.survivornet.ca">www.survivornet.ca</a>                                    |  | 7  |
| 15 | Canadian Council of the Blind                             | <a href="http://www.ccbnational.net">www.ccbnational.net</a>                                  |  | 7  |
| 16 | Canadian Digestive Health Foundation                      | <a href="https://cdhf.ca">https://cdhf.ca</a>                                                 |  | 2  |
| 17 | Canadian Epilepsy Alliance                                | <a href="http://www.canadianepilepsyalliance.org">http://www.canadianepilepsyalliance.org</a> |  | 3  |
| 18 | Canadian Hemophilia                                       | <a href="https://www.hemophilia.ca">https://www.hemophilia.ca</a>                             |  | 8  |
| 19 | Canadian Hospice Palliative Care                          | <a href="http://www.chpca.net">http://www.chpca.net</a>                                       |  | 10 |
| 20 | Canadian Liver                                            | <a href="http://www.liver.ca">www.liver.ca</a>                                                |  | 7  |
| 21 | Canadian Mental Health Association                        | <a href="https://cmha.ca">https://cmha.ca</a>                                                 |  | 3  |



|    |    |                                                                 |                                                                                                               |                                       |
|----|----|-----------------------------------------------------------------|---------------------------------------------------------------------------------------------------------------|---------------------------------------|
| 1  |    |                                                                 |                                                                                                               |                                       |
| 2  | 22 | Canadian Mesothelioma Foundation                                | <a href="http://cmfonline.org">http://cmfonline.org</a>                                                       | 1                                     |
| 3  |    |                                                                 | <a href="http://cmfonline.org">g</a>                                                                          |                                       |
| 4  |    |                                                                 |                                                                                                               |                                       |
| 5  | 23 | Canadian MPN Network                                            | <a href="http://canadianmpnnetwork.ca">http://canadianmpnnetwork.ca</a>                                       | 2                                     |
| 6  |    |                                                                 |                                                                                                               |                                       |
| 7  |    |                                                                 |                                                                                                               |                                       |
| 8  | 24 | Canadian Organization for Rare Disorders                        | <a href="http://www.raredisorders.ca">www.raredisorders.ca</a>                                                | 4                                     |
| 9  |    |                                                                 |                                                                                                               |                                       |
| 10 | 25 | Canadian Pain Coalition                                         | <a href="https://www.facebook.com/CanadianPainCoalition/">https://www.facebook.com/CanadianPainCoalition/</a> | 0                                     |
| 11 |    |                                                                 |                                                                                                               |                                       |
| 12 |    |                                                                 |                                                                                                               |                                       |
| 13 |    |                                                                 |                                                                                                               |                                       |
| 14 | 26 | Canadian PBC Society                                            | <a href="http://www.pbc-society.ca">www.pbc-society.ca</a>                                                    | 1                                     |
| 15 |    |                                                                 |                                                                                                               |                                       |
| 16 | 27 | Canadian Pemphigus and Pemphigoid Foundation                    | <a href="http://pemphigus.ca">http://pemphigus.ca</a>                                                         | 1                                     |
| 17 |    |                                                                 |                                                                                                               |                                       |
| 18 |    |                                                                 |                                                                                                               |                                       |
| 19 | 28 | Canadian Pituitary Patient Network                              | <a href="https://canadianpituitary.org">https://canadianpituitary.org</a>                                     | 0                                     |
| 20 |    |                                                                 |                                                                                                               |                                       |
| 21 |    |                                                                 |                                                                                                               |                                       |
| 22 | 29 | Canadian PKU & Allied Disorders Inc.                            | <a href="http://www.canpku.org">www.canpku.org</a>                                                            | 6                                     |
| 23 |    |                                                                 |                                                                                                               |                                       |
| 24 |    |                                                                 |                                                                                                               |                                       |
| 25 | 30 | Canadian Psoriasis Network                                      | <a href="http://www.canadianpsoriasisnetwork.com">www.canadianpsoriasisnetwork.com</a>                        | 1                                     |
| 26 |    |                                                                 |                                                                                                               |                                       |
| 27 | 31 | Canadian Pulmonary Fibrosis Foundation                          | <a href="http://www.cpff.ca">www.cpff.ca</a>                                                                  | 2                                     |
| 28 |    |                                                                 |                                                                                                               |                                       |
| 29 |    |                                                                 |                                                                                                               |                                       |
| 30 | 32 | Canadian Skin Patient Alliance                                  | <a href="http://www.canadianskin.ca">www.canadianskin.ca</a>                                                  | 2                                     |
| 31 |    |                                                                 |                                                                                                               |                                       |
| 32 |    |                                                                 |                                                                                                               |                                       |
| 33 | 33 | Canadian Society for Mucopolysaccharide & Related Diseases Inc. | <a href="http://www.mpsociety.ca">www.mpsociety.ca</a>                                                        | 1                                     |
| 34 |    |                                                                 |                                                                                                               |                                       |
| 35 |    |                                                                 |                                                                                                               |                                       |
| 36 | 34 | Canadian Society of Intestinal Research                         | <a href="https://www.badgut.org">https://www.badgut.org</a>                                                   | 1                                     |
| 37 |    |                                                                 |                                                                                                               |                                       |
| 38 |    |                                                                 |                                                                                                               |                                       |
| 39 | 35 | Canadian Spondylitis                                            | <a href="http://www.spondyli.ca">http://www.spondyli.ca</a>                                                   | 1                                     |
| 40 |    |                                                                 |                                                                                                               |                                       |
| 41 | 36 | Canadian Treatment Action Council                               | <a href="http://www.ctac.ca">www.ctac.ca</a>                                                                  | Website broken as of March 10, 2021   |
| 42 |    |                                                                 |                                                                                                               | Not applicable                        |
| 43 |    |                                                                 |                                                                                                               |                                       |
| 44 |    |                                                                 |                                                                                                               |                                       |
| 45 | 37 | Cancer Advocacy Coalition of Canada                             | <a href="http://www.canceradvocacy.ca">http://www.canceradvocacy.ca</a>                                       | Name now changed to: Cancer Survivors |
| 46 |    |                                                                 |                                                                                                               | 1                                     |
| 47 |    |                                                                 |                                                                                                               |                                       |
| 48 |    |                                                                 |                                                                                                               |                                       |
| 49 |    |                                                                 |                                                                                                               |                                       |
| 50 | 38 | Carcinoid-NeuroEndocrine Tumour Society Canada                  | <a href="http://www.cnetscanada.org">www.cnetscanada.org</a>                                                  | 1                                     |
| 51 |    |                                                                 |                                                                                                               |                                       |
| 52 |    |                                                                 |                                                                                                               |                                       |
| 53 |    |                                                                 |                                                                                                               |                                       |
| 54 |    |                                                                 |                                                                                                               |                                       |
| 55 |    |                                                                 |                                                                                                               |                                       |
| 56 |    |                                                                 |                                                                                                               |                                       |
| 57 |    |                                                                 |                                                                                                               |                                       |
| 58 |    |                                                                 |                                                                                                               |                                       |
| 59 |    |                                                                 |                                                                                                               |                                       |
| 60 |    |                                                                 |                                                                                                               |                                       |

|    |                                                           |                                                                                                                                       |                                                                                              |                |
|----|-----------------------------------------------------------|---------------------------------------------------------------------------------------------------------------------------------------|----------------------------------------------------------------------------------------------|----------------|
| 39 | Centre for ADHD Awareness, Canada (CADDAC)                | <a href="http://www.caddac.ca">www.caddac.ca</a>                                                                                      |                                                                                              | 1              |
| 40 | Chronic Lymphocytic Leukemia Patient Advocacy Group (CLL) | <a href="http://www.cllpag.ca">www.cllpag.ca</a>                                                                                      | Name now changed to: CLL Canada                                                              | 3              |
| 41 | Chronic Myelogenous Leukemia Society of Canada            | <a href="http://cmlsociety.org">http://cmlsociety.org</a>                                                                             | Name now changed to: CML Society                                                             | 8              |
| 42 | Chronic Pain Association of Canada                        | <a href="http://www.chronicpaincanada.com">www.chronicpaincanada.com</a>                                                              |                                                                                              | 1              |
| 43 | CNIB (Canadian National Institute for the Blind)          | <a href="http://www.cnib.ca">www.cnib.ca</a>                                                                                          |                                                                                              | 8              |
| 44 | Colorectal Cancer Canada                                  | <a href="https://www.colorectalcancer canada.com">https://www.colorectalcancer canada.com</a>                                         |                                                                                              | 11             |
| 45 | Consumer Advocare Network                                 | <a href="http://survivornet.ca/en/partners/consumer_advocare_network">http://survivornet.ca/en/partners/consumer_advocare_network</a> | Website broken as of March 10, 2021                                                          | Not applicable |
| 46 | COPD Canada                                               | <a href="http://www.copdcanada.info">www.copdcanada.info</a>                                                                          |                                                                                              | 3              |
| 47 | COPD Canada Patient                                       | <a href="http://www.copdcanada.ca">www.copdcanada.ca</a>                                                                              |                                                                                              | 0              |
| 48 | Craig's Cause Pancreatic Cancer Society                   | <a href="http://www.craigsc ause.ca">http://www.craigsc ause.ca</a>                                                                   |                                                                                              | 1              |
| 49 | Crohn's and Colitis Canada                                | <a href="http://www.crohnsandcolitis.ca">www.crohnsandcolitis.ca</a>                                                                  |                                                                                              | 4              |
| 50 | Cystic Fibrosis Canada                                    | <a href="http://www.cysticfibrosis.ca">www.cysticfibrosis.ca</a>                                                                      |                                                                                              | 5              |
| 51 | Diabetes Canada (Canadian Diabetes Association)           | <a href="http://www.diabetes.ca">www.diabetes.ca</a>                                                                                  |                                                                                              | 24             |
| 52 | Eczema Society of Canada                                  | <a href="https://eczemahelp.ca/">https://eczemahelp.ca/</a>                                                                           |                                                                                              | 19             |
| 53 | FH Canada Patient Network                                 | <a href="https://thefhfoundation.org/global-fh-canada">https://thefhfoundation.org/global-fh-canada</a>                               | Name now changed to: FH Foundation                                                           | 18             |
| 54 | Food Allergy Canada (Anaphylaxis Canada)                  | <a href="https://foodallergy canada.ca">https://foodallergy canada.ca</a>                                                             |                                                                                              | 14             |
| 55 | Foundation Fighting Blindness                             | <a href="https://ffb.ca">https://ffb.ca</a>                                                                                           | New website: <a href="https://www.fightingblindness.ca">https://www.fightingblindness.ca</a> | 18             |

|    |    |                                                           |                                                                                         |    |
|----|----|-----------------------------------------------------------|-----------------------------------------------------------------------------------------|----|
| 1  |    |                                                           |                                                                                         |    |
| 2  | 56 | Foundation for Prader-Willi Research Canada (FPWR Canada) | <a href="https://www.fpwr.ca">https://www.fpwr.ca</a>                                   | 2  |
| 3  |    |                                                           |                                                                                         |    |
| 4  |    |                                                           |                                                                                         |    |
| 5  | 57 | GIST Sarcoma Life Raft Group Canada                       | <a href="https://liferaftgroup.ca/welcome/">https://liferaftgroup.ca/welcome/</a>       | 4  |
| 6  |    |                                                           |                                                                                         |    |
| 7  |    |                                                           |                                                                                         |    |
| 8  | 58 | HeartLife Foundation                                      | <a href="http://www.heartlife.ca">www.heartlife.ca</a>                                  | 1  |
| 9  | 59 | Hep C Awareness.com                                       | <a href="http://www.hepcawareness.com">www.hepcawareness.com</a>                        | 0  |
| 10 |    |                                                           |                                                                                         |    |
| 11 |    |                                                           |                                                                                         |    |
| 12 | 60 | HS Aware - Now appears to be HS                           | <a href="http://www.hsaware.com">www.hsaware.com</a>                                    | 3  |
| 13 |    |                                                           | New website:                                                                            |    |
| 14 | 61 | Huntington Society of Canada                              | <a href="https://www.huntingtonsociety.ca">https://www.huntingtonsociety.ca</a>         | 24 |
| 15 |    |                                                           |                                                                                         |    |
| 16 | 62 | Hypertension Canada                                       | <a href="https://hypertension.ca/about-us/">https://hypertension.ca/about-us/</a>       | 7  |
| 17 |    |                                                           |                                                                                         |    |
| 18 |    |                                                           |                                                                                         |    |
| 19 | 63 | Kidney Cancer Canada                                      | <a href="https://www.kidneycancercanada.ca">https://www.kidneycancercanada.ca</a>       | 13 |
| 20 |    |                                                           |                                                                                         |    |
| 21 |    |                                                           |                                                                                         |    |
| 22 | 64 | Leukemia & Lymphoma Society of Canada                     | <a href="https://www.llscanada.org">https://www.llscanada.org</a>                       | 9  |
| 23 |    |                                                           |                                                                                         |    |
| 24 |    |                                                           |                                                                                         |    |
| 25 | 65 | Lung Cancer Canada                                        | <a href="http://www.lungcancercanada.ca">http://www.lungcancercanada.ca</a>             | 6  |
| 26 |    |                                                           |                                                                                         |    |
| 27 |    |                                                           |                                                                                         |    |
| 28 | 66 | Lupus Canada                                              | <a href="http://www.lupuscanada.org">www.lupuscanada.org</a>                            | 9  |
| 29 |    |                                                           |                                                                                         |    |
| 30 | 67 | Lymphoma Canada                                           | <a href="https://www.lymphoma.ca">https://www.lymphoma.ca</a>                           | 22 |
| 31 |    |                                                           |                                                                                         |    |
| 32 |    |                                                           |                                                                                         |    |
| 33 | 68 | Mastocytosis Society Canada                               | <a href="https://www.mastocytosis.ca/en/">https://www.mastocytosis.ca/en/</a>           | 17 |
| 34 |    |                                                           |                                                                                         |    |
| 35 | 69 | Melanoma Network of Canada                                | <a href="https://www.melanomanetwork.ca">https://www.melanomanetwork.ca</a>             | 35 |
| 36 |    |                                                           |                                                                                         |    |
| 37 |    |                                                           |                                                                                         |    |
| 38 | 70 | Millions Missing Canada                                   | <a href="https://www.millionsmissingcanada.ca">https://www.millionsmissingcanada.ca</a> | 5  |
| 39 |    |                                                           |                                                                                         |    |
| 40 |    |                                                           |                                                                                         |    |
| 41 | 71 | MS Society of Canada                                      | <a href="http://www.mssociety.ca">www.mssociety.ca</a>                                  | 74 |
| 42 | 72 | Myeloma Canada                                            | <a href="https://www.myeloma.ca">https://www.myeloma.ca</a>                             | 38 |
| 43 |    |                                                           |                                                                                         |    |
| 44 | 73 | National Gaucher Foundation of Canada                     | <a href="http://www.gauchercanada.ca">www.gauchercanada.ca</a>                          | 10 |
| 45 |    |                                                           |                                                                                         |    |
| 46 | 74 | Neuroblastoma Canada                                      | <a href="http://neuroblastoma.ca">http://neuroblastoma.ca</a>                           | 4  |
| 47 |    |                                                           |                                                                                         |    |
| 48 | 75 | Osteoporosis Canada                                       | <a href="http://www.osteoporosis.ca">www.osteoporosis.ca</a>                            | 19 |
| 49 |    |                                                           |                                                                                         |    |
| 50 |    |                                                           |                                                                                         |    |
| 51 | 76 | Ovarian Cancer Canada                                     | <a href="https://ovariancanada.org">https://ovariancanada.org</a>                       | 21 |
| 52 |    |                                                           |                                                                                         |    |
| 53 | 77 | Pancreatic Cancer Canada                                  | <a href="http://www.pancreaticcancercanada.ca">http://www.pancreaticcancercanada.ca</a> | 20 |
| 54 |    |                                                           |                                                                                         |    |
| 55 |    |                                                           |                                                                                         |    |
| 56 | 78 | Parkinson Canada                                          | <a href="https://www.parkinson.ca">https://www.parkinson.ca</a>                         | 18 |
| 57 |    |                                                           |                                                                                         |    |
| 58 |    |                                                           |                                                                                         |    |
| 59 |    |                                                           |                                                                                         |    |

|    |                                                      |                                                                                     |                                                            |                |
|----|------------------------------------------------------|-------------------------------------------------------------------------------------|------------------------------------------------------------|----------------|
| 79 | Patient Commando                                     | <a href="http://www.patientcommando.com">www.patientcommando.com</a>                |                                                            | 8              |
| 80 | People in Pain Network                               | <a href="http://www.pipain.com">www.pipain.com</a>                                  |                                                            | 8              |
| 81 | Polycystic Kidney Disease (PKD) Foundation of Canada | <a href="http://www.endpkd.ca">www.endpkd.ca</a>                                    | Name now changed to: PKD Foundation of Canada              | 5              |
| 82 | Prostate Cancer Canada                               | <a href="http://www.prostatecancer.ca">http://www.prostatecancer.ca</a>             | Now part of Canadian Cancer Society as of February 1, 2020 | Not applicable |
| 83 | Pulmonary Hypertension Association of Canada         | <a href="http://www.phacanada.ca">www.phacanada.ca</a>                              |                                                            | 15             |
| 84 | Rethink Breast Cancer                                | <a href="https://rethinkbreastcancer.com">https://rethinkbreastcancer.com</a>       |                                                            | 8              |
| 85 | Robbie's Rainbow                                     | <a href="http://robbiesrainbow.ca">http://robbiesrainbow.ca</a>                     |                                                            | 6              |
| 86 | Sarcoma Cancer Foundation of Canada                  | <a href="http://sarcomacancer.ca">http://sarcomacancer.ca</a>                       |                                                            | 3              |
| 87 | Save Your Skin Foundation                            | <a href="http://www.saveyourskin.ca">www.saveyourskin.ca</a>                        |                                                            | 4              |
| 88 | Scleroderma Society of Canada                        | <a href="http://www.scleroderma.ca">www.scleroderma.ca</a>                          | Name now changed to: Scleroderma Canada                    | 5              |
| 89 | Sjogren's Society of Canada                          | <a href="http://www.sjogrenscanada.org">www.sjogrenscanada.org</a>                  |                                                            | 6              |
| 90 | Soft Bones Canada                                    | <a href="http://www.softbonescanada.ca">www.softbonescanada.ca</a>                  |                                                            | 13             |
| 91 | The Canadian Continence Foundation                   | <a href="http://www.canadiancontinence.ca">www.canadiancontinence.ca</a>            |                                                            | 9              |
| 92 | The Endometriosis Network                            | <a href="https://endometriosisnetwork.com">https://endometriosisnetwork.com</a>     | Name now changed to: The Endometriosis Network Canada      | 4              |
| 93 | The Isaac Foundation                                 | <a href="https://www.theisaacfoundation.com">https://www.theisaacfoundation.com</a> |                                                            | 0              |

|    |     |                       |                                                                               |    |
|----|-----|-----------------------|-------------------------------------------------------------------------------|----|
| 1  |     |                       |                                                                               |    |
| 2  | 94  | Thyroid Cancer Canada | <a href="http://www.thyroidcancer.ca">www.thyroidcancer.ca</a>                | 6  |
| 3  | 95  | Tourette Syndrome     | <a href="https://tourette.ca">https://tourette.ca</a>                         | 14 |
| 4  |     | Foundation of Canada  |                                                                               |    |
| 5  |     |                       |                                                                               |    |
| 6  | 96  | Trigeminal Neuralgia  | <a href="http://www.tnac.org">www.tnac.org</a>                                | 1  |
| 7  |     | Association of Canada |                                                                               |    |
| 8  | 97  | Tuberous Sclerosis    | <a href="https://www.tscanada.ca">https://www.tscanada.ca</a>                 | 7  |
| 9  |     | Canada Sclerose       |                                                                               |    |
| 10 |     | Tubereuse             |                                                                               |    |
| 11 |     |                       |                                                                               |    |
| 12 | 98  | Type 1 Together       | <a href="http://www.type1together.ca">www.type1together.ca</a>                | 4  |
| 13 |     |                       |                                                                               |    |
| 14 | 99  | Wounds Canada         | <a href="https://www.woundscanada.ca">https://www.woundscanada.ca</a>         | 12 |
| 15 |     | (Canadian Association |                                                                               |    |
| 16 |     | of Wound Care)        |                                                                               |    |
| 17 |     |                       |                                                                               |    |
| 18 | 100 | Young Adult Cancer    | <a href="https://www.youngadultcancer.ca">https://www.youngadultcancer.ca</a> | 10 |
| 19 |     | Canada                |                                                                               |    |
| 20 |     |                       |                                                                               |    |
| 21 |     |                       |                                                                               |    |
| 22 |     |                       |                                                                               |    |
| 23 |     |                       |                                                                               |    |
| 24 |     |                       |                                                                               |    |
| 25 |     |                       |                                                                               |    |
| 26 |     |                       |                                                                               |    |
| 27 |     |                       |                                                                               |    |
| 28 |     |                       |                                                                               |    |
| 29 |     |                       |                                                                               |    |
| 30 |     |                       |                                                                               |    |
| 31 |     |                       |                                                                               |    |
| 32 |     |                       |                                                                               |    |
| 33 |     |                       |                                                                               |    |
| 34 |     |                       |                                                                               |    |
| 35 |     |                       |                                                                               |    |
| 36 |     |                       |                                                                               |    |
| 37 |     |                       |                                                                               |    |
| 38 |     |                       |                                                                               |    |
| 39 |     |                       |                                                                               |    |
| 40 |     |                       |                                                                               |    |
| 41 |     |                       |                                                                               |    |
| 42 |     |                       |                                                                               |    |
| 43 |     |                       |                                                                               |    |
| 44 |     |                       |                                                                               |    |
| 45 |     |                       |                                                                               |    |
| 46 |     |                       |                                                                               |    |
| 47 |     |                       |                                                                               |    |
| 48 |     |                       |                                                                               |    |
| 49 |     |                       |                                                                               |    |
| 50 |     |                       |                                                                               |    |
| 51 |     |                       |                                                                               |    |
| 52 |     |                       |                                                                               |    |
| 53 |     |                       |                                                                               |    |
| 54 |     |                       |                                                                               |    |
| 55 |     |                       |                                                                               |    |
| 56 |     |                       |                                                                               |    |
| 57 |     |                       |                                                                               |    |
| 58 |     |                       |                                                                               |    |
| 59 |     |                       |                                                                               |    |
| 60 |     |                       |                                                                               |    |

## Supplementary File 6: Information about revenue and donations on individual patient groups' public websites

| Patient group number ‡ | Total annual revenue | Donations in general                 |                          |                                                                        |                      | Pharmaceutical company donations     |                                                  |                                                                 | Donor information on website |                              |                                |                                           |
|------------------------|----------------------|--------------------------------------|--------------------------|------------------------------------------------------------------------|----------------------|--------------------------------------|--------------------------------------------------|-----------------------------------------------------------------|------------------------------|------------------------------|--------------------------------|-------------------------------------------|
|                        |                      | Dollar range of individual donations | Total value of donations | Breakdown of total donations by source (e.g., corporate, individual s) | Purpose of donations | Number of groups reporting donations | Value of donations from pharmaceutical companies | Percent of total revenue from pharmaceutical company donations* | Any donor logo               | Pharmaceutical company donor | Hyperlink to any donor website | Hyperlink to pharmaceutical company donor |
| 1                      |                      |                                      |                          |                                                                        |                      |                                      |                                                  |                                                                 |                              |                              |                                |                                           |
| 2                      | x                    | x                                    |                          |                                                                        |                      | x                                    |                                                  |                                                                 | x                            | x                            | x                              | x                                         |
| 3                      |                      |                                      |                          |                                                                        |                      | x                                    |                                                  |                                                                 | x                            | x                            |                                |                                           |
| 4                      | x                    |                                      | x                        |                                                                        |                      | x                                    |                                                  |                                                                 | x                            | x                            |                                |                                           |
| 5                      | x                    |                                      | x                        |                                                                        |                      | x                                    |                                                  |                                                                 | x                            | x                            | x                              | x                                         |
| 6                      |                      |                                      |                          |                                                                        |                      |                                      |                                                  |                                                                 |                              |                              |                                |                                           |
| 6                      |                      |                                      |                          |                                                                        |                      | x                                    |                                                  |                                                                 | x                            | x                            | x                              | x                                         |
| 7                      | x                    |                                      | x                        |                                                                        |                      |                                      |                                                  |                                                                 | x                            |                              |                                |                                           |
| 8                      |                      |                                      |                          |                                                                        |                      |                                      |                                                  |                                                                 |                              |                              |                                |                                           |
| 9                      |                      |                                      |                          |                                                                        |                      | x                                    |                                                  |                                                                 | x                            | x                            | x                              | x                                         |
| 10                     |                      |                                      |                          |                                                                        |                      |                                      |                                                  |                                                                 |                              |                              |                                |                                           |
| 11                     | x                    |                                      |                          |                                                                        |                      | x                                    |                                                  |                                                                 | x                            | x                            | x                              | x                                         |
| 12                     | x                    |                                      |                          | x                                                                      |                      |                                      |                                                  |                                                                 |                              |                              |                                |                                           |
| 13                     |                      |                                      |                          |                                                                        |                      |                                      |                                                  |                                                                 |                              |                              |                                |                                           |
| 14                     |                      |                                      |                          |                                                                        |                      | x                                    |                                                  |                                                                 |                              |                              |                                |                                           |
| 15                     | x                    |                                      |                          |                                                                        |                      | x                                    |                                                  |                                                                 |                              |                              |                                |                                           |
| 16                     | x                    |                                      | x                        |                                                                        |                      | x                                    |                                                  |                                                                 | x                            | x                            | x                              | x                                         |
| 17                     |                      |                                      |                          |                                                                        |                      |                                      |                                                  |                                                                 |                              |                              |                                |                                           |
| 18                     |                      |                                      |                          |                                                                        |                      |                                      |                                                  |                                                                 |                              |                              |                                |                                           |
| 19                     |                      |                                      |                          |                                                                        |                      |                                      |                                                  |                                                                 |                              |                              |                                |                                           |

1  
2  
3  
4  
5  
6  
7  
8  
9  
10  
11  
12  
13  
14  
15  
16  
17  
18  
19  
20  
21  
22  
23  
24  
25  
26  
27  
28  
29  
30  
31  
32  
33  
34  
35  
36  
37  
38  
39  
40  
41  
42  
43  
44  
45  
46

|    |   |   |   |   |   |   |   |   |  |   |   |   |   |
|----|---|---|---|---|---|---|---|---|--|---|---|---|---|
| 20 | x |   |   | x |   | x |   |   |  | x | x | x | x |
| 21 | x |   |   |   |   |   |   |   |  |   |   |   |   |
| 22 | x |   |   |   |   | x |   |   |  | x | x |   |   |
| 23 |   |   |   |   | x |   |   |   |  |   |   | x |   |
| 24 | x | x |   |   |   | x |   |   |  |   |   |   |   |
| 25 | x |   | x |   |   |   | x | x |  |   |   | x |   |
| 26 |   |   |   |   |   |   |   |   |  |   |   |   |   |
| 27 |   |   |   |   |   |   |   |   |  |   |   |   |   |
| 28 |   |   |   |   |   | x |   |   |  | x | x | x | x |
| 29 | x |   | x |   |   |   |   |   |  | x |   | x |   |
| 30 |   |   |   |   |   | x |   |   |  | x | x | x | x |
| 31 | x |   | x |   |   | x |   |   |  | x | x |   |   |
| 31 | x |   |   |   |   | x |   |   |  | x | x |   |   |
| 32 |   |   |   |   |   | x |   |   |  |   |   |   |   |
| 33 | x |   |   | x |   | x |   |   |  |   |   | x | x |
| 34 |   |   |   |   |   |   |   |   |  |   |   |   |   |
| 35 |   |   |   |   |   | x |   |   |  |   |   |   |   |
| 36 |   |   |   |   |   |   |   |   |  |   |   |   |   |
| 37 | x |   |   |   |   | x |   |   |  | x | x | x | x |
| 38 |   |   |   |   |   |   |   |   |  |   |   |   |   |
| 39 | x |   |   |   |   | x |   |   |  | x | x | x | x |
| 40 |   | x |   |   |   |   |   |   |  | x |   | x |   |
| 41 |   |   |   |   |   | x |   |   |  | x | x |   |   |
| 42 |   |   |   |   |   |   |   |   |  |   |   | x |   |
| 43 | x |   |   |   |   | x |   |   |  | x | x | x |   |
| 44 |   |   |   |   |   |   |   |   |  | x |   |   |   |
| 45 | x |   |   |   |   | x |   |   |  |   |   |   |   |
| 46 |   |   |   |   |   |   |   |   |  |   |   |   |   |

|    |   |   |   |   |   |   |  |  |   |   |   |   |
|----|---|---|---|---|---|---|--|--|---|---|---|---|
| 47 |   |   |   |   |   |   |  |  |   |   |   |   |
| 48 | x |   | x |   |   |   |  |  |   |   |   |   |
| 49 | x | x |   |   |   | x |  |  | x | x |   |   |
| 50 | x | x |   |   |   | x |  |  | x | x | x | x |
| 51 | x |   |   | x |   | x |  |  | x | x | x | x |
| 53 |   |   |   |   |   |   |  |  |   |   |   |   |
| 54 | x | x | x | x | x | x |  |  | x | x | x | x |
| 55 |   |   |   |   |   | x |  |  | x | x | x | x |
| 56 |   |   |   |   |   |   |  |  |   |   |   |   |
| 57 | x |   | x |   |   |   |  |  |   |   |   |   |
| 58 |   |   |   |   |   | x |  |  | x | x |   |   |
| 60 |   |   |   |   |   |   |  |  |   |   |   |   |
| 61 | x | x |   |   |   | x |  |  | x | x | x | x |
| 62 | x |   |   | x |   | x |  |  | x |   | x |   |
| 63 |   |   |   |   |   | x |  |  | x | x |   |   |
| 64 | x | x |   |   |   | x |  |  | x |   |   |   |
| 65 |   |   |   |   |   | x |  |  | x | x | x | x |
| 66 |   |   |   |   |   |   |  |  |   |   |   |   |
| 67 |   |   |   |   |   |   |  |  |   |   |   |   |
| 68 |   |   |   |   |   |   |  |  |   |   |   |   |
| 69 |   |   |   |   |   | x |  |  |   |   |   |   |
| 70 | x |   | x |   |   | x |  |  | x | x |   |   |
| 71 | x |   | x | x |   | x |  |  | x | x | x | x |
| 72 | x |   |   |   |   | x |  |  | x | x |   |   |
| 73 |   |   |   |   |   |   |  |  |   |   |   |   |
| 74 | x | x |   |   |   | x |  |  | x | x |   |   |
| 75 | x |   |   |   |   | x |  |  | x | x |   |   |
| 76 | x |   | x |   |   | x |  |  | x | x |   |   |



1  
2  
3  
4  
5  
6  
7  
8  
9  
10  
11  
12  
13  
14  
15  
16  
17  
18  
19  
20  
21  
22  
23  
24  
25  
26  
27  
28  
29  
30  
31  
32  
33  
34  
35  
36  
37  
38  
39  
40  
41  
42  
43  
44  
45  
46

|              |           |          |           |          |          |           |          |          |           |           |           |           |
|--------------|-----------|----------|-----------|----------|----------|-----------|----------|----------|-----------|-----------|-----------|-----------|
| 77           | x         |          |           |          |          | x         |          |          | x         | x         |           |           |
| 78           | x         |          | x         | x        | x        | x         |          |          | x         |           |           |           |
| 79           |           |          |           |          |          |           |          |          |           |           |           |           |
| 80           |           |          |           |          |          |           |          |          |           |           |           |           |
| 81           | x         |          | x         |          |          |           |          |          |           |           |           |           |
| 82           |           |          |           |          |          | x         |          |          | x         | x         |           |           |
| 83           |           |          |           |          |          |           |          |          | x         |           |           |           |
| 84           |           |          |           |          |          | x         |          |          | x         | x         | x         |           |
| 85           | x         |          |           |          |          |           |          |          |           |           |           |           |
| 86           |           |          |           |          | x        | x         |          |          | x         | x         | x         | x         |
| 87           |           |          |           |          |          | x         |          |          | x         | x         | x         | x         |
| 88           |           |          |           |          |          | x         |          |          | x         | x         |           |           |
| 89           |           |          |           |          |          | x         |          |          | x         |           | x         |           |
| 90           |           |          |           |          |          | x         |          |          | x         | x         | x         | x         |
| 91           |           |          |           |          |          |           |          |          |           |           |           |           |
| 92           |           |          |           |          |          |           |          |          |           |           |           |           |
| 93           | x         |          | x         |          |          |           |          |          | x         |           |           |           |
| 94           |           |          |           |          |          |           |          |          |           |           |           |           |
| 95           | x         |          | x         |          |          |           |          |          |           |           |           |           |
| 96           |           |          |           |          |          | x         |          |          | x         | x         |           |           |
| 97           |           |          |           |          |          |           |          |          |           |           |           |           |
| <b>Total</b> | <b>42</b> | <b>9</b> | <b>17</b> | <b>8</b> | <b>4</b> | <b>53</b> | <b>1</b> | <b>1</b> | <b>51</b> | <b>41</b> | <b>31</b> | <b>20</b> |

‡Patient groups have been anonymized  
\*Calculated from information on website

**Supplementary File 7: Information about employment of board and staff on individual patient groups' public websites**

| Patient group number‡ | Board members              |                |           |                                                     |     | Staff                                      |     |
|-----------------------|----------------------------|----------------|-----------|-----------------------------------------------------|-----|--------------------------------------------|-----|
|                       | General employment history |                |           | Pharmaceutical industry employment history reported |     | Pharmaceutical employment history reported |     |
|                       | None*                      | Brief synopsis | Detailed† | No                                                  | Yes | No*                                        | Yes |
| 1                     |                            | x              |           | x                                                   |     | x                                          |     |
| 2                     | x                          |                |           | x                                                   |     | x                                          |     |
| 3                     |                            | x              |           | x                                                   |     | x                                          |     |
| 4                     | x                          |                |           | x                                                   |     | x                                          |     |
| 5                     | x                          |                |           | x                                                   |     | x                                          |     |
| 6                     |                            | x              |           | x                                                   |     | x                                          |     |
| 7                     |                            |                | x         |                                                     | x   | x                                          |     |
| 8                     | x                          |                |           | x                                                   |     | x                                          |     |
| 9                     | x                          |                |           | x                                                   |     | x                                          |     |
| 10                    | x                          |                |           | x                                                   |     | x                                          |     |
| 11                    | x                          |                |           | x                                                   |     | x                                          |     |
| 12                    |                            |                | x         | x                                                   |     | x                                          |     |
| 13                    |                            | x              |           | x                                                   |     | x                                          |     |
| 14                    |                            | x              |           | x                                                   |     | x                                          |     |
| 15                    |                            | x              |           | x                                                   |     | x                                          |     |
| 16                    |                            | x              |           | x                                                   |     | x                                          |     |
| 17                    |                            | x              |           |                                                     | x   | x                                          |     |
| 18                    |                            | x              |           | x                                                   |     | x                                          |     |
| 19                    |                            | x              |           | x                                                   |     | x                                          |     |
| 20                    |                            | x              |           | x                                                   |     | x                                          |     |
| 21                    |                            | x              |           | x                                                   |     | x                                          |     |
| 22                    | x                          |                |           | x                                                   |     | x                                          |     |
| 23                    | x                          |                |           | x                                                   |     | x                                          |     |
| 24                    | x                          |                |           | x                                                   |     | x                                          |     |
| 25                    |                            | x              |           | x                                                   |     | x                                          |     |
| 26                    |                            | x              |           |                                                     | x   | x                                          |     |
| 27                    | x                          |                |           | x                                                   |     | x                                          |     |
| 28                    |                            | x              |           | x                                                   |     | x                                          |     |
| 29                    |                            | x              |           | x                                                   |     | x                                          |     |
| 30                    |                            | x              |           |                                                     | x   | x                                          |     |
| 31                    | x                          |                |           | x                                                   |     | x                                          |     |
| 32                    | x                          |                |           | x                                                   |     | x                                          |     |
| 33                    |                            | x              |           | x                                                   |     |                                            | x   |
| 34                    |                            | x              |           | x                                                   |     | x                                          |     |
| 35                    | x                          |                |           | x                                                   |     | x                                          |     |
| 36                    | x                          |                |           | x                                                   |     | x                                          |     |
| 37                    | x                          |                |           | x                                                   |     | x                                          |     |
| 38                    |                            | x              |           | x                                                   |     | x                                          |     |
| 39                    |                            |                | x         |                                                     | x   | x                                          |     |

|    |  |  |  |  |  |  |  |
|----|--|--|--|--|--|--|--|
| 1  |  |  |  |  |  |  |  |
| 2  |  |  |  |  |  |  |  |
| 3  |  |  |  |  |  |  |  |
| 4  |  |  |  |  |  |  |  |
| 5  |  |  |  |  |  |  |  |
| 6  |  |  |  |  |  |  |  |
| 7  |  |  |  |  |  |  |  |
| 8  |  |  |  |  |  |  |  |
| 9  |  |  |  |  |  |  |  |
| 10 |  |  |  |  |  |  |  |
| 11 |  |  |  |  |  |  |  |
| 12 |  |  |  |  |  |  |  |
| 13 |  |  |  |  |  |  |  |
| 14 |  |  |  |  |  |  |  |
| 15 |  |  |  |  |  |  |  |
| 16 |  |  |  |  |  |  |  |
| 17 |  |  |  |  |  |  |  |
| 18 |  |  |  |  |  |  |  |
| 19 |  |  |  |  |  |  |  |
| 20 |  |  |  |  |  |  |  |
| 21 |  |  |  |  |  |  |  |
| 22 |  |  |  |  |  |  |  |
| 23 |  |  |  |  |  |  |  |
| 24 |  |  |  |  |  |  |  |
| 25 |  |  |  |  |  |  |  |
| 26 |  |  |  |  |  |  |  |
| 27 |  |  |  |  |  |  |  |
| 28 |  |  |  |  |  |  |  |
| 29 |  |  |  |  |  |  |  |
| 30 |  |  |  |  |  |  |  |
| 31 |  |  |  |  |  |  |  |
| 32 |  |  |  |  |  |  |  |
| 33 |  |  |  |  |  |  |  |
| 34 |  |  |  |  |  |  |  |
| 35 |  |  |  |  |  |  |  |
| 36 |  |  |  |  |  |  |  |
| 37 |  |  |  |  |  |  |  |
| 38 |  |  |  |  |  |  |  |
| 39 |  |  |  |  |  |  |  |
| 40 |  |  |  |  |  |  |  |
| 41 |  |  |  |  |  |  |  |
| 42 |  |  |  |  |  |  |  |
| 43 |  |  |  |  |  |  |  |
| 44 |  |  |  |  |  |  |  |
| 45 |  |  |  |  |  |  |  |
| 46 |  |  |  |  |  |  |  |
| 47 |  |  |  |  |  |  |  |
| 48 |  |  |  |  |  |  |  |
| 49 |  |  |  |  |  |  |  |
| 50 |  |  |  |  |  |  |  |
| 51 |  |  |  |  |  |  |  |
| 52 |  |  |  |  |  |  |  |
| 53 |  |  |  |  |  |  |  |
| 54 |  |  |  |  |  |  |  |
| 55 |  |  |  |  |  |  |  |
| 56 |  |  |  |  |  |  |  |
| 57 |  |  |  |  |  |  |  |
| 58 |  |  |  |  |  |  |  |
| 59 |  |  |  |  |  |  |  |
| 60 |  |  |  |  |  |  |  |
| 61 |  |  |  |  |  |  |  |
| 62 |  |  |  |  |  |  |  |
| 63 |  |  |  |  |  |  |  |
| 64 |  |  |  |  |  |  |  |
| 65 |  |  |  |  |  |  |  |
| 66 |  |  |  |  |  |  |  |
| 67 |  |  |  |  |  |  |  |
| 68 |  |  |  |  |  |  |  |
| 69 |  |  |  |  |  |  |  |
| 70 |  |  |  |  |  |  |  |
| 71 |  |  |  |  |  |  |  |
| 72 |  |  |  |  |  |  |  |
| 73 |  |  |  |  |  |  |  |
| 74 |  |  |  |  |  |  |  |
| 75 |  |  |  |  |  |  |  |
| 76 |  |  |  |  |  |  |  |
| 77 |  |  |  |  |  |  |  |
| 78 |  |  |  |  |  |  |  |
| 79 |  |  |  |  |  |  |  |
| 80 |  |  |  |  |  |  |  |
| 81 |  |  |  |  |  |  |  |
| 82 |  |  |  |  |  |  |  |
| 83 |  |  |  |  |  |  |  |
| 84 |  |  |  |  |  |  |  |
| 85 |  |  |  |  |  |  |  |

|              |           |           |          |           |           |           |          |
|--------------|-----------|-----------|----------|-----------|-----------|-----------|----------|
| 86           | x         |           |          | x         |           | x         |          |
| 87           | x         |           |          | x         |           | x         |          |
| 88           |           | x         |          | x         |           | x         |          |
| 89           |           | x         |          | x         |           | x         |          |
| 90           |           | x         |          | x         |           | x         |          |
| 91           |           | x         |          |           | x         | x         |          |
| 92           | x         |           |          | x         |           | x         |          |
| 93           |           | x         |          |           | x         | x         |          |
| 94           | x         |           |          | x         |           | x         |          |
| 95           |           | x         |          | x         |           | x         |          |
| 96           | x         |           |          | x         |           | x         |          |
| 97           |           | x         |          | x         |           | x         |          |
| <b>Total</b> | <b>38</b> | <b>53</b> | <b>6</b> | <b>80</b> | <b>17</b> | <b>93</b> | <b>4</b> |

‡Patient groups have been anonymized

\*Board members (staff) not named or no information about employment history

†For example, year ranges with position, job title, employer

1  
2  
3  
4  
5  
6  
7  
8  
9  
10  
11  
12  
13  
14  
15  
16  
17  
18  
19  
20  
21  
22  
23  
24  
25  
26  
27  
28  
29  
30  
31  
32  
33  
34  
35  
36  
37  
38  
39  
40  
41  
42  
43  
44  
45  
46  
47  
48  
49  
50  
51  
52  
53  
54  
55  
56  
57  
58  
59  
60

For peer review only

## STROBE Statement—checklist of items that should be included in reports of observational studies

|                           | Item No | Recommendation                                                                                                                                                                                                                                                                                                                                                                                                                                                         | Page No |
|---------------------------|---------|------------------------------------------------------------------------------------------------------------------------------------------------------------------------------------------------------------------------------------------------------------------------------------------------------------------------------------------------------------------------------------------------------------------------------------------------------------------------|---------|
| <b>Title and abstract</b> | 1       | (a) Indicate the study's design with a commonly used term in the title or the abstract                                                                                                                                                                                                                                                                                                                                                                                 | 1       |
|                           |         | (b) Provide in the abstract an informative and balanced summary of what was done and what was found                                                                                                                                                                                                                                                                                                                                                                    | 2-3     |
| <b>Introduction</b>       |         |                                                                                                                                                                                                                                                                                                                                                                                                                                                                        |         |
| Background/rationale      | 2       | Explain the scientific background and rationale for the investigation being reported                                                                                                                                                                                                                                                                                                                                                                                   | 5-6     |
| Objectives                | 3       | State specific objectives, including any prespecified hypotheses                                                                                                                                                                                                                                                                                                                                                                                                       | 6-7     |
| <b>Methods</b>            |         |                                                                                                                                                                                                                                                                                                                                                                                                                                                                        |         |
| Study design              | 4       | Present key elements of study design early in the paper                                                                                                                                                                                                                                                                                                                                                                                                                | 7-8     |
| Setting                   | 5       | Describe the setting, locations, and relevant dates, including periods of recruitment, exposure, follow-up, and data collection                                                                                                                                                                                                                                                                                                                                        | 7-10    |
| Participants              | 6       | (a) <i>Cohort study</i> —Give the eligibility criteria, and the sources and methods of selection of participants. Describe methods of follow-up<br><i>Case-control study</i> —Give the eligibility criteria, and the sources and methods of case ascertainment and control selection. Give the rationale for the choice of cases and controls<br><i>Cross-sectional study</i> —Give the eligibility criteria, and the sources and methods of selection of participants |         |
|                           |         | (b) <i>Cohort study</i> —For matched studies, give matching criteria and number of exposed and unexposed<br><i>Case-control study</i> —For matched studies, give matching criteria and the number of controls per case                                                                                                                                                                                                                                                 |         |
| Variables                 | 7       | Clearly define all outcomes, exposures, predictors, potential confounders, and effect modifiers. Give diagnostic criteria, if applicable                                                                                                                                                                                                                                                                                                                               | 10-11   |
| Data sources/measurement  | 8*      | For each variable of interest, give sources of data and details of methods of assessment (measurement). Describe comparability of assessment methods if there is more than one group                                                                                                                                                                                                                                                                                   | 9-10    |
| Bias                      | 9       | Describe any efforts to address potential sources of bias                                                                                                                                                                                                                                                                                                                                                                                                              |         |
| Study size                | 10      | Explain how the study size was arrived at                                                                                                                                                                                                                                                                                                                                                                                                                              |         |
| Quantitative variables    | 11      | Explain how quantitative variables were handled in the analyses. If applicable, describe which groupings were chosen and why                                                                                                                                                                                                                                                                                                                                           | 10-11   |
| Statistical methods       | 12      | (a) Describe all statistical methods, including those used to control for confounding                                                                                                                                                                                                                                                                                                                                                                                  |         |
|                           |         | (b) Describe any methods used to examine subgroups and interactions                                                                                                                                                                                                                                                                                                                                                                                                    |         |
|                           |         | (c) Explain how missing data were addressed                                                                                                                                                                                                                                                                                                                                                                                                                            |         |
|                           |         | (d) <i>Cohort study</i> —If applicable, explain how loss to follow-up was addressed<br><i>Case-control study</i> —If applicable, explain how matching of cases and controls was addressed<br><i>Cross-sectional study</i> —If applicable, describe analytical methods taking account of sampling strategy                                                                                                                                                              |         |
|                           |         | (e) Describe any sensitivity analyses                                                                                                                                                                                                                                                                                                                                                                                                                                  |         |

Continued on next page

1  
2  
3  
4  
5  
6  
7  
8  
9  
10  
11  
12  
13  
14  
15  
16  
17  
18  
19  
20  
21  
22  
23  
24  
25  
26  
27  
28  
29  
30  
31  
32  
33  
34  
35  
36  
37  
38  
39  
40  
41  
42  
43  
44  
45  
46  
47  
48  
49  
50  
51  
52  
53  
54  
55  
56  
57  
58  
59  
60**Results**

|                  |     |                                                                                                                                                                                                              |       |
|------------------|-----|--------------------------------------------------------------------------------------------------------------------------------------------------------------------------------------------------------------|-------|
| Participants     | 13* | (a) Report numbers of individuals at each stage of study—eg numbers potentially eligible, examined for eligibility, confirmed eligible, included in the study, completing follow-up, and analysed            | 11    |
|                  |     | (b) Give reasons for non-participation at each stage                                                                                                                                                         | 11    |
|                  |     | (c) Consider use of a flow diagram                                                                                                                                                                           | 11    |
| Descriptive data | 14* | (a) Give characteristics of study participants (eg demographic, clinical, social) and information on exposures and potential confounders                                                                     | 11-12 |
|                  |     | (b) Indicate number of participants with missing data for each variable of interest                                                                                                                          |       |
|                  |     | (c) <i>Cohort study</i> —Summarise follow-up time (eg, average and total amount)                                                                                                                             |       |
| Outcome data     | 15* | <i>Cohort study</i> —Report numbers of outcome events or summary measures over time                                                                                                                          |       |
|                  |     | <i>Case-control study</i> —Report numbers in each exposure category, or summary measures of exposure                                                                                                         |       |
|                  |     | <i>Cross-sectional study</i> —Report numbers of outcome events or summary measures                                                                                                                           |       |
| Main results     | 16  | (a) Give unadjusted estimates and, if applicable, confounder-adjusted estimates and their precision (eg, 95% confidence interval). Make clear which confounders were adjusted for and why they were included | 12-20 |
|                  |     | (b) Report category boundaries when continuous variables were categorized                                                                                                                                    |       |
|                  |     | (c) If relevant, consider translating estimates of relative risk into absolute risk for a meaningful time period                                                                                             |       |
| Other analyses   | 17  | Report other analyses done—eg analyses of subgroups and interactions, and sensitivity analyses                                                                                                               |       |

**Discussion**

|                  |    |                                                                                                                                                                            |       |
|------------------|----|----------------------------------------------------------------------------------------------------------------------------------------------------------------------------|-------|
| Key results      | 18 | Summarise key results with reference to study objectives                                                                                                                   | 21    |
| Limitations      | 19 | Discuss limitations of the study, taking into account sources of potential bias or imprecision. Discuss both direction and magnitude of any potential bias                 | 24-25 |
| Interpretation   | 20 | Give a cautious overall interpretation of results considering objectives, limitations, multiplicity of analyses, results from similar studies, and other relevant evidence | 25-27 |
| Generalisability | 21 | Discuss the generalisability (external validity) of the study results                                                                                                      | 25    |

**Other information**

|         |    |                                                                                                                                                               |    |
|---------|----|---------------------------------------------------------------------------------------------------------------------------------------------------------------|----|
| Funding | 22 | Give the source of funding and the role of the funders for the present study and, if applicable, for the original study on which the present article is based | 30 |
|---------|----|---------------------------------------------------------------------------------------------------------------------------------------------------------------|----|

\*Give information separately for cases and controls in case-control studies and, if applicable, for exposed and unexposed groups in cohort and cross-sectional studies.

**Note:** An Explanation and Elaboration article discusses each checklist item and gives methodological background and published examples of transparent reporting. The STROBE checklist is best used in conjunction with this article (freely available on the Web sites of PLoS Medicine at <http://www.plosmedicine.org/>, Annals of Internal Medicine at <http://www.annals.org/>, and Epidemiology at <http://www.epidem.com/>). Information on the STROBE Initiative is available at [www.strobe-statement.org](http://www.strobe-statement.org).
