# Supplementary material for: National patient groups in Canada and their disclosure of relationships with pharmaceutical companies: a cross-sectional study
Source: PubMed Central journal article supplement — BMJ Open. 2022 Mar 8;12(3):e055287. doi: 10.1136/bmjopen-2021-055287 (PMC8915328; doi:10.1136/bmjopen-2021-055287), 2022-03-08
Supplement: bmjopen-2021-055287supp001.pdf [file bmjopen-2021-055287supp001.pdf]

**Supplementary File 1: Search for patient groups registered to make submissions**

| <b>Provincial/territorial drug plans</b> | <b>Website</b>                                                                                                                                                                                                                                                                                                              | <b>Search date</b> |
|------------------------------------------|-----------------------------------------------------------------------------------------------------------------------------------------------------------------------------------------------------------------------------------------------------------------------------------------------------------------------------|--------------------|
| Alberta                                  | <a href="https://www.alberta.ca/drug-benefit-list-and-drug-review-process.aspx">https://www.alberta.ca/drug-benefit-list-and-drug-review-process.aspx</a>                                                                                                                                                                   | April 22, 2019     |
| British Columbia                         | <a href="https://www2.gov.bc.ca/gov/content/health/health-drug-coverage/pharmacare-for-bc-residents/drug-review-process-results/your-voice#patient-group">https://www2.gov.bc.ca/gov/content/health/health-drug-coverage/pharmacare-for-bc-residents/drug-review-process-results/your-voice#patient-group</a>               | April 22, 2019     |
| Manitoba                                 | <a href="https://www.gov.mb.ca/health/pharmacare/">https://www.gov.mb.ca/health/pharmacare/</a>                                                                                                                                                                                                                             | April 22, 2019     |
| New Brunswick                            | <a href="https://www2.gnb.ca/content/gnb/en/departments/health/MedicarePrescriptionDrugPlan/NBDrugPlan.html">https://www2.gnb.ca/content/gnb/en/departments/health/MedicarePrescriptionDrugPlan/NBDrugPlan.html</a>                                                                                                         | April 22, 2019     |
| Newfoundland and Labrador                | <a href="https://www.gov.nl.ca/hcs/prescription/">https://www.gov.nl.ca/hcs/prescription/</a>                                                                                                                                                                                                                               | April 22, 2019     |
| Northwest Territories                    | <a href="https://www.hss.gov.nt.ca/en/services/supplementary-health-benefits/extended-health-benefits-specified-disease-conditions">https://www.hss.gov.nt.ca/en/services/supplementary-health-benefits/extended-health-benefits-specified-disease-conditions</a>                                                           | April 22, 2019     |
| Nova Scotia                              | <a href="https://novascotia.ca/dhw/pharmacare/">https://novascotia.ca/dhw/pharmacare/</a>                                                                                                                                                                                                                                   | April 22, 2019     |
| Nunavut                                  | <a href="http://66.240.131.202/en-ca/Provincial-Coverage/nunavut/drug-benefit-programs">http://66.240.131.202/en-ca/Provincial-Coverage/nunavut/drug-benefit-programs</a>                                                                                                                                                   | April 22, 2019     |
| Ontario                                  | <a href="https://www.health.gov.on.ca/en/pro/programs/drugs/patient_evidence/registered_advocacy_groups.aspx">https://www.health.gov.on.ca/en/pro/programs/drugs/patient_evidence/registered_advocacy_groups.aspx</a>                                                                                                       | April 22, 2019     |
| Prince Edward Island                     | <a href="https://www.princeedwardisland.ca/en/information/health-pe/pei/drug-programs">https://www.princeedwardisland.ca/en/information/health-pe/pei/drug-programs</a>                                                                                                                                                     | April 22, 2019     |
| Quebec                                   | <a href="https://www.ramq.gouv.qc.ca/en/citizens/prescription-drug-insurance">https://www.ramq.gouv.qc.ca/en/citizens/prescription-drug-insurance</a>                                                                                                                                                                       | April 22, 2019     |
| Saskatchewan                             | <a href="https://www.saskatchewan.ca/residents/health/prescription-drug-plans-and-health-coverage/extended-benefits-and-drug-plan/saskatchewan-drug-plan">https://www.saskatchewan.ca/residents/health/prescription-drug-plans-and-health-coverage/extended-benefits-and-drug-plan/saskatchewan-drug-plan</a>               | April 22, 2019     |
| Yukon                                    | <a href="https://yukon.ca/en/health-and-wellness/medical-professionals/find-drug-coverage-information">https://yukon.ca/en/health-and-wellness/medical-professionals/find-drug-coverage-information</a>                                                                                                                     | April 22, 2019     |
| <b>Agencies, organizations</b>           | <b>Website</b>                                                                                                                                                                                                                                                                                                              | <b>Search date</b> |
| Best Medicines Coalition                 | <a href="https://bestmedicinescoalition.org/members/">https://bestmedicinescoalition.org/members/</a>                                                                                                                                                                                                                       | April 23, 2019     |
| pan-Canadian Oncology Drug Review        | <a href="https://web.archive.org/web/20210228191917/https://www.cadth.ca/sites/default/files/pcodr/Submit%20%26%20Contribute/pcodr-registered-patientadgrps.pdf">https://web.archive.org/web/20210228191917/https://www.cadth.ca/sites/default/files/pcodr/Submit%20%26%20Contribute/pcodr-registered-patientadgrps.pdf</a> | April 23, 2019     |
