# Supplementary material for: National patient groups in Canada and their disclosure of relationships with pharmaceutical companies: a cross-sectional study
Source: PubMed Central journal article supplement — BMJ Open. 2022 Mar 8;12(3):e055287. doi: 10.1136/bmjopen-2021-055287 (PMC8915328; doi:10.1136/bmjopen-2021-055287), 2022-03-08
Supplement: bmjopen-2021-055287supp003.pdf [file bmjopen-2021-055287supp003.pdf]

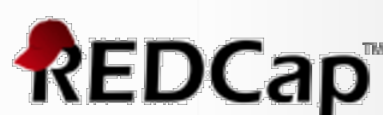

Logged in as jlexchin | Log out

- My Projects
- Project Home
- Project Setup

Project status: **Production**

Data Collection

- Manage Survey Participants
- Record Status Dashboard
- Add / Edit Records

Identification Number 101 [Select other record](#)

Data Collection Instruments:

- Part A: Data Extraction Tool for Patient Group Website
- Part B: Data Extraction Tool for Patient Group Policies

Applications

- Calendar
- Data Exports, Reports, and Stats
- Data Import Tool
- Data Comparison Tool
- Logging
- Field Comment Log
- File Repository
- User Rights and DAGs

Help & Information

- Help & FAQ
- Video Tutorials
- Suggest a New Feature

Contact REDCap administrator

### Patient Groups Study - PRODUCTION - JL (30-10-2020)

Save Record  
 Save and Continue  
 Save and go to Next Form  
 Save and Mark Response as Complete

Actions: [Download PDF of instrument\(s\)](#) [Share instrument in the Library](#) [VIDEO: Basic data entry](#)

#### Part A: Data Extraction Tool for Patient Group Website

Adding new Identification Number 101

Identification Number 101

Name of patient group (to be anonymized later)  \* must provide value

Does the website/annual/financial report provide the annual revenue for a fiscal year?  Yes  No [reset](#)

Provide the fiscal year for which this data extraction applies.  If more than one year, choose most recent.

Provide the total annual revenue of the patient group for this fiscal year.

Does the website/annual/fiscal report provide total annual revenue from pharmaceutical and medical device donors, specifically?  Yes  No [reset](#)

What information does the website/annual/financial report provide regarding the source and amount of grants and/or donations for the most recent fiscal year?  
 None  
 Donor(s) only  
 Amount(s) only  
 Donor(s) and amount(s)

What information is provided about the donation amount(s)?  
 None  
 Range of amount  
 Exact amount  
 Percent of total donations by type of source (i.e., corporate vs. foundation vs. human donors)

Does the website make the purpose of each donation public (i.e., donation earmarked for...)?  Yes  No [reset](#)

Does the website provide information the amount used for each activity?  Yes  No [reset](#)

If exact value, category (i.e., gold, silver, bronze) or range (i.e., \$5000-9999) for donation amounts is available, provide.

Are donors' logos provided?  Yes  No [reset](#)

Are hyperlinks to donor websites provided?  No  Yes  Some

Does the website provide identities of the board members?  Yes  No [reset](#)

What information is provided about board members' employment?  
 None  
 Brief synopsis  
 Specific (i.e., year ranges with position title, employer details)

Does the employment information or synopsis for board members disclose any current or previous employment in the pharmaceutical or medical device industries?  No  Yes

Does the employment information or synopsis for staff (i.e., communications director, administrative staff) disclose any current or previous employment in the pharmaceutical or medical device industries?  Yes  No [reset](#)  
Note: whether paid or volunteer

Does the website provide information on external audit reports?  Yes  No [reset](#)

List the criteria that are audited.

Does the patient group endorse any specific treatment or donor?  No  Treatment  Donor [Check all that apply](#)

**Form Status**

Complete?  Incomplete

Save Record  
 Save and Continue  
 Save and go to Next Form  
 Save and Mark Response as Complete  
 -- Cancel --
