# Supplementary material for: National patient groups in Canada and their disclosure of relationships with pharmaceutical companies: a cross-sectional study
Source: PubMed Central journal article supplement — BMJ Open. 2022 Mar 8;12(3):e055287. doi: 10.1136/bmjopen-2021-055287 (PMC8915328; doi:10.1136/bmjopen-2021-055287), 2022-03-08
Supplement: bmjopen-2021-055287supp004.pdf [file bmjopen-2021-055287supp004.pdf]

single donor?  No policy

Does the organization's policy allow only a fixed amount of its annual revenue to be provided by a single donor?  No  Yes  No policy

Does the organization's policy set a fixed limit on the percentage of its annual revenue that it will accept from donors in total?  No  Yes  No policy

Does the organization's policy allow for "sponsorship packages", i.e., what benefits donors get from donations of a certain amount (e.g., exhibit space, company's name on all room keys, etc.).  No  Yes  No policy

Does the organization's policy state that the organization has total independence in its decision making?  No  Yes  No policy

Does the organization's policy state that the patient group retains final and complete control over all decisions it makes, all materials, and pronouncements that carry its name?  No  Yes  No policy

Does the organization's policy allow for the name of any donor to be listed on its website under any circumstances, except to identify the name and/or logo of the donor and the amount of money received, i.e., for an endorsement?  No  Yes  No policy

Does the organization's policy allow for the endorsement of any specific treatment or any specific donor?  No  Yes  No policy

Does the organization's policy allow for a hyperlink to be provided to a donor's website?  No  Yes  No policy

Does the organization's policy allow for the patient group to directly or indirectly cooperate with companies in lobbying, testifying, addressing legislators, regulators, or policymakers, writing articles or policy briefs, etc. (e.g., submit its own letter and support donor's position)?  No  Yes  No policy

Does the organization's policy allow donors to directly organize seminars, lectures, projects, or meetings?  No  Yes  No policy

Does the organization's policy allow donors to directly provide funding for seminars, lectures, projects, or meetings?  No  Yes  No policy

Does the organization's policy allow donors to directly contribute to printing costs?  No  Yes  No policy

Does the organization's policy allow donors to directly plan/arrange recreational services, lodging or travel for representative of the organization or participants?  No  Yes  No policy

Does the organization's policy allow donors to directly pay for conference travel and accommodation for organization representatives or participants?  No  Yes  No policy

Does the organization's policy allow donors to directly sponsor research grants, study fellowships, internships, or other opportunities administered by the organization for people in the field?  No  Yes  No policy

Does the organization's policy allow donors to provide donations in kind, e.g., facilities, administration, training materials, books for libraries, website design?  No  Yes  No policy

Does the organization's policy allow donors to directly pay staff salaries or provide staff support?  No  Yes  No policy

Does the organization's policy allow for any other assistance from donors or other companies acting on behalf of donors?  No  Yes  No policy

Does the organization's policy allow donors to provide information to patient group members about products that the donor makes?  No  Yes  No policy

Does the organization's policy allow donors to provide gifts of educational value to patient group members (e.g., webinars, books, brochures)?  No  Yes  No policy

Does the organization's policy allow for donors to provide gifts of non-educational value to patient group members?  No  Yes  No policy

Does the organization's policy allow donors to provide patient group members with advocacy materials?  No  Yes  No policy

Does the organization's policy allow donors to provide a nurse/social worker/etc. to assist patient group members with treatment?  No  Yes  No policy

Does the organization's policy allow donors to survey patient group members, access membership data or membership lists, or otherwise gain information about members?  No  Yes  No policy

Does the organization's policy allow donors to provide expert opinions about products or policies?  No  Yes  No policy

Does the organization's policy allow donors to provide opportunities to patient group members to learn about lobbying/advocacy techniques?  No  Yes  No policy

Does the organization's policy allow donors to encourage individual lobbying/advocacy activities for patient group members?  No  Yes  No policy

Does the organization's policy allow donors to provide information to patient group members about policies or positions adopted or suggested by the donor?  No  Yes  No policy

If the organization's policy regulates any other areas of interaction between patient group members and donors, list.  No  Yes  No policy

Does the organization's policy provide for any independent monitoring of their policies?  No  Yes  No policy

Does the organization's policy provide for an independent audit regarding on what activities donor money has been spent?  No  Yes  No policy

Does the organization's policy provide for publicly available results of the independent monitoring?  No  Yes  No policy

Does the organization's policy provide for what happens if the organization is not compliant with its policies? (i.e., internal review if noncompliance.)  No  Yes  No policy

**Form Status**

Complete?  Incomplete

[Save Record](#)

[Save and Continue](#)

[Save and Mark Response as Complete](#)

[-- Cancel --](#)
