# Supplementary material for: National patient groups in Canada and their disclosure of relationships with pharmaceutical companies: a cross-sectional study
Source: PubMed Central journal article supplement — BMJ Open. 2022 Mar 8;12(3):e055287. doi: 10.1136/bmjopen-2021-055287 (PMC8915328; doi:10.1136/bmjopen-2021-055287), 2022-03-08
Supplement: bmjopen-2021-055287supp005.pdf [file bmjopen-2021-055287supp005.pdf]

**Supplementary File 5: Names of patient groups, websites and**

|    | <b>Name of group</b>                                      | <b>Website</b>                                                                                | <b>Notes</b> | <b>Number of pieces of information analyzed</b> |
|----|-----------------------------------------------------------|-----------------------------------------------------------------------------------------------|--------------|-------------------------------------------------|
| 1  | AboutFace Craniofacial Family Society                     | <a href="http://www.aboutface.ca">www.aboutface.ca</a>                                        |              | 3                                               |
| 2  | Advocacy for Canadian Childhood Oncology Research Network | <a href="http://www.curesforourkids.com">http://www.curesforourkids.com</a>                   |              | 4                                               |
| 3  | aHUS Canada/SHUa                                          | <a href="http://www.ahuscanada.org">www.ahuscanada.org</a>                                    |              | 8                                               |
| 4  | ALS Society of Canada                                     | <a href="https://www.als.ca">https://www.als.ca</a>                                           |              | 8                                               |
| 5  | Aplastic Anemia and Myelodysplasia Association of Canada  | <a href="http://www.aamac.ca">www.aamac.ca</a>                                                |              | 3                                               |
| 6  | Arthritis Consumer                                        | <a href="http://www.jointhehealth.org">www.jointhehealth.org</a>                              |              | 15                                              |
| 7  | Asthma Canada                                             | <a href="https://asthma.ca">https://asthma.ca</a>                                             |              | 22                                              |
| 8  | Best Medicines Coalition                                  | <a href="https://bestmedicinescoalition.org">https://bestmedicinescoalition.org</a>           |              | 10                                              |
| 9  | Bladder Cancer Canada                                     | <a href="https://bladdercancercanada.org/en/">https://bladdercancercanada.org/en/</a>         |              | 8                                               |
| 10 | Brain Tumour Foundation of Canada                         | <a href="https://www.braintumour.ca">https://www.braintumour.ca</a>                           |              | 4                                               |
| 11 | Canadian Arthritis Patient Alliance                       | <a href="http://www.arthritispatient.ca">www.arthritispatient.ca</a>                          |              | 24                                              |
| 12 | Canadian Breast Cancer Network                            | <a href="https://www.cbcn.ca/en/">https://www.cbcn.ca/en/</a>                                 |              | 10                                              |
| 13 | Canadian Cancer                                           | <a href="http://www.cancer.ca">www.cancer.ca</a>                                              |              | 8                                               |
| 14 | Canadian Cancer Survivor Network                          | <a href="http://www.survivornet.ca">www.survivornet.ca</a>                                    |              | 7                                               |
| 15 | Canadian Council of the Blind                             | <a href="http://www.ccbnational.net">www.ccbnational.net</a>                                  |              | 7                                               |
| 16 | Canadian Digestive Health Foundation                      | <a href="https://cdhf.ca">https://cdhf.ca</a>                                                 |              | 2                                               |
| 17 | Canadian Epilepsy Alliance                                | <a href="http://www.canadianepilepsyalliance.org">http://www.canadianepilepsyalliance.org</a> |              | 3                                               |
| 18 | Canadian Hemophilia Society                               | <a href="https://www.hemophiliacsociety.ca">https://www.hemophiliacsociety.ca</a>             |              | 8                                               |
| 19 | Canadian Hospice Palliative Care                          | <a href="http://www.chpca.net">http://www.chpca.net</a>                                       |              | 10                                              |
| 20 | Canadian Liver                                            | <a href="http://www.liver.ca">www.liver.ca</a>                                                |              | 7                                               |
| 21 | Canadian Mental Health Association                        | <a href="https://cmha.ca">https://cmha.ca</a>                                                 |              | 3                                               |

|    |                                                                 |                                                                                                               |                                       |                |
|----|-----------------------------------------------------------------|---------------------------------------------------------------------------------------------------------------|---------------------------------------|----------------|
| 22 | Canadian Mesothelioma Foundation                                | <a href="http://cmfonline.org">http://cmfonline.org</a>                                                       |                                       | 1              |
| 23 | Canadian MPN Network                                            | <a href="http://canadianmpnnetwork.ca">http://canadianmpnnetwork.ca</a>                                       |                                       | 2              |
| 24 | Canadian Organization for Rare Disorders                        | <a href="http://www.raredisorders.ca">www.raredisorders.ca</a>                                                |                                       | 4              |
| 25 | Canadian Pain Coalition                                         | <a href="https://www.facebook.com/CanadianPainCoalition/">https://www.facebook.com/CanadianPainCoalition/</a> |                                       | 0              |
| 26 | Canadian PBC Society                                            | <a href="http://www.pbc-society.ca">www.pbc-society.ca</a>                                                    |                                       | 1              |
| 27 | Canadian Pemphigus and Pemphigoid Foundation                    | <a href="http://pemphigus.ca">http://pemphigus.ca</a>                                                         |                                       | 1              |
| 28 | Canadian Pituitary Patient Network                              | <a href="https://canadianpituitary.org">https://canadianpituitary.org</a>                                     |                                       | 0              |
| 29 | Canadian PKU & Allied Disorders Inc.                            | <a href="http://www.canpku.org">www.canpku.org</a>                                                            |                                       | 6              |
| 30 | Canadian Psoriasis Network                                      | <a href="http://www.canadianpsoriasisnetwork.com">www.canadianpsoriasisnetwork.com</a>                        |                                       | 1              |
| 31 | Canadian Pulmonary Fibrosis Foundation                          | <a href="http://www.cfff.ca">www.cfff.ca</a>                                                                  |                                       | 2              |
| 32 | Canadian Skin Patient Alliance                                  | <a href="http://www.canadianskin.ca">www.canadianskin.ca</a>                                                  |                                       | 2              |
| 33 | Canadian Society for Mucopolysaccharide & Related Diseases Inc. | <a href="http://www.mppsociety.ca">www.mppsociety.ca</a>                                                      |                                       | 1              |
| 34 | Canadian Society of Intestinal Research                         | <a href="https://www.badgut.org">https://www.badgut.org</a>                                                   |                                       | 1              |
| 35 | Canadian Spondylitis                                            | <a href="http://www.spondyli.ca">http://www.spondyli.ca</a>                                                   |                                       | 1              |
| 36 | Canadian Treatment Action Council                               | <a href="http://www.ctac.ca">www.ctac.ca</a>                                                                  | Website broken as of March 10, 2021   | Not applicable |
| 37 | Cancer Advocacy Coalition of Canada                             | <a href="http://www.canceradvocacy.ca">http://www.canceradvocacy.ca</a>                                       | Name now changed to: Cancer Survivors | 1              |
| 38 | Carcinoid-NeuroEndocrine Tumour Society Canada                  | <a href="http://www.cnetscanada.org">www.cnetscanada.org</a>                                                  |                                       | 1              |

|    |                                                           |                                                                                                                                       |                                                                                              |                |
|----|-----------------------------------------------------------|---------------------------------------------------------------------------------------------------------------------------------------|----------------------------------------------------------------------------------------------|----------------|
| 39 | Centre for ADHD Awareness, Canada (CADDAC)                | <a href="http://www.caddac.ca">www.caddac.ca</a>                                                                                      |                                                                                              | 1              |
| 40 | Chronic Lymphocytic Leukemia Patient Advocacy Group (CLL) | <a href="http://www.clipag.ca">www.clipag.ca</a>                                                                                      | Name now changed to: CLL Canada                                                              | 3              |
| 41 | Chronic Myelogenous Leukemia Society of Canada            | <a href="http://cmlsociety.org">http://cmlsociety.org</a>                                                                             | Name now changed to: CML Society                                                             | 8              |
| 42 | Chronic Pain Association of Canada                        | <a href="http://www.chronicpaincanada.com">www.chronicpaincanada.com</a>                                                              |                                                                                              | 1              |
| 43 | CNIB (Canadian National Institute for the Blind)          | <a href="http://www.cnib.ca">www.cnib.ca</a>                                                                                          |                                                                                              | 8              |
| 44 | Colorectal Cancer Canada                                  | <a href="https://www.colorectalcancerCanada.com">https://www.colorectalcancerCanada.com</a>                                           |                                                                                              | 11             |
| 45 | Consumer Advocare Network                                 | <a href="http://survivornet.ca/en/partners/consumer_advocare_network">http://survivornet.ca/en/partners/consumer_advocare_network</a> | Website broken as of March 10, 2021                                                          | Not applicable |
| 46 | COPD Canada                                               | <a href="http://www.copdcanada.info">www.copdcanada.info</a>                                                                          |                                                                                              | 3              |
| 47 | COPD Canada Patient                                       | <a href="http://www.copdcanada.ca">www.copdcanada.ca</a>                                                                              |                                                                                              | 0              |
| 48 | Craig's Cause Pancreatic Cancer Society                   | <a href="http://www.craigsc ause.ca">http://www.craigsc ause.ca</a>                                                                   |                                                                                              | 1              |
| 49 | Crohn's and Colitis Canada                                | <a href="http://www.crohnsandcolitis.ca">www.crohnsandcolitis.ca</a>                                                                  |                                                                                              | 4              |
| 50 | Cystic Fibrosis Canada                                    | <a href="http://www.cysticfibrosis.ca">www.cysticfibrosis.ca</a>                                                                      |                                                                                              | 5              |
| 51 | Diabetes Canada (Canadian Diabetes Association)           | <a href="http://www.diabetes.ca">www.diabetes.ca</a>                                                                                  |                                                                                              | 24             |
| 52 | Eczema Society of Canada                                  | <a href="https://eczemahelp.ca/">https://eczemahelp.ca/</a>                                                                           |                                                                                              | 19             |
| 53 | FH Canada Patient Network                                 | <a href="https://thefhfoundation.org/global-fh-canada">https://thefhfoundation.org/global-fh-canada</a>                               | Name now changed to: FH Foundation                                                           | 18             |
| 54 | Food Allergy Canada (Anaphylaxis Canada)                  | <a href="https://foodallergyCanada.ca">https://foodallergyCanada.ca</a>                                                               |                                                                                              | 14             |
| 55 | Foundation Fighting Blindness                             | <a href="https://ffb.ca">https://ffb.ca</a>                                                                                           | New website: <a href="https://www.fightingblindness.ca">https://www.fightingblindness.ca</a> | 18             |

|    |                                                           |                                                                                         |              |
|----|-----------------------------------------------------------|-----------------------------------------------------------------------------------------|--------------|
| 56 | Foundation for Prader-Willi Research Canada (FPWR Canada) | <a href="https://www.fpwr.ca">https://www.fpwr.ca</a>                                   | 2            |
| 57 | GIST Sarcoma Life Raft Group Canada                       | <a href="https://liferaftgroup.ca/welcome/">https://liferaftgroup.ca/welcome/</a>       | 4            |
| 58 | HeartLife Foundation                                      | <a href="http://www.heartlife.ca">www.heartlife.ca</a>                                  | 1            |
| 59 | Hep C Awareness.com                                       | <a href="http://www.hepcawareness.com">www.hepcawareness.com</a>                        | 0            |
| 60 | HS Aware - Now appears to be HS                           | <a href="http://www.hsaware.com">www.hsaware.com</a>                                    | 3            |
|    |                                                           |                                                                                         | New website: |
| 61 | Huntington Society of Canada                              | <a href="https://www.huntingtonsociety.ca">https://www.huntingtonsociety.ca</a>         | 24           |
| 62 | Hypertension Canada                                       | <a href="https://hypertension.ca/about-us/">https://hypertension.ca/about-us/</a>       | 7            |
| 63 | Kidney Cancer Canada                                      | <a href="https://www.kidneycancercanada.ca">https://www.kidneycancercanada.ca</a>       | 13           |
| 64 | Leukemia & Lymphoma Society of Canada                     | <a href="https://www.llscanada.org">https://www.llscanada.org</a>                       | 9            |
| 65 | Lung Cancer Canada                                        | <a href="http://www.lungcancercanada.ca">http://www.lungcancercanada.ca</a>             | 6            |
| 66 | Lupus Canada                                              | <a href="http://www.lupuscanada.org">www.lupuscanada.org</a>                            | 9            |
| 67 | Lymphoma Canada                                           | <a href="https://www.lymphoma.ca">https://www.lymphoma.ca</a>                           | 22           |
| 68 | Mastocytosis Society Canada                               | <a href="https://www.mastocytosis.ca/en/">https://www.mastocytosis.ca/en/</a>           | 17           |
| 69 | Melanoma Network of Canada                                | <a href="https://www.melanomanetwork.ca">https://www.melanomanetwork.ca</a>             | 35           |
| 70 | Millions Missing Canada                                   | <a href="https://www.millionsmissingcanada.ca">https://www.millionsmissingcanada.ca</a> | 5            |
| 71 | MS Society of Canada                                      | <a href="http://www.mssociety.ca">www.mssociety.ca</a>                                  | 74           |
| 72 | Myeloma Canada                                            | <a href="https://www.myeloma.ca">https://www.myeloma.ca</a>                             | 38           |
| 73 | National Gaucher Foundation of Canada                     | <a href="http://www.gauchercanada.ca">www.gauchercanada.ca</a>                          | 10           |
| 74 | Neuroblastoma Canada                                      | <a href="http://neuroblastoma.ca">http://neuroblastoma.ca</a>                           | 4            |
| 75 | Osteoporosis Canada                                       | <a href="http://www.osteoporosis.ca">www.osteoporosis.ca</a>                            | 19           |
| 76 | Ovarian Cancer Canada                                     | <a href="https://ovariancanada.org">https://ovariancanada.org</a>                       | 21           |
| 77 | Pancreatic Cancer Canada                                  | <a href="http://www.pancreaticcancercanada.ca">http://www.pancreaticcancercanada.ca</a> | 20           |
| 78 | Parkinson Canada                                          | <a href="https://www.parkinson.ca">https://www.parkinson.ca</a>                         | 18           |

|    |                                                      |                                                                                     |                                                            |                |
|----|------------------------------------------------------|-------------------------------------------------------------------------------------|------------------------------------------------------------|----------------|
| 79 | Patient Commando                                     | <a href="http://www.patientcommando.com">www.patientcommando.com</a>                |                                                            | 8              |
| 80 | People in Pain Network                               | <a href="http://www.pipain.com">www.pipain.com</a>                                  |                                                            | 8              |
| 81 | Polycystic Kidney Disease (PKD) Foundation of Canada | <a href="http://www.endpkd.ca">www.endpkd.ca</a>                                    | Name now changed to: PKD Foundation of Canada              | 5              |
| 82 | Prostate Cancer Canada                               | <a href="http://www.prostatecancer.ca">http://www.prostatecancer.ca</a>             | Now part of Canadian Cancer Society as of February 1, 2020 | Not applicable |
| 83 | Pulmonary Hypertension Association of Canada         | <a href="http://www.phacanada.ca">www.phacanada.ca</a>                              |                                                            | 15             |
| 84 | Rethink Breast Cancer                                | <a href="https://rethinkbreastcancer.com">https://rethinkbreastcancer.com</a>       |                                                            | 8              |
| 85 | Robbie's Rainbow                                     | <a href="http://robbiesrainbow.ca">http://robbiesrainbow.ca</a>                     |                                                            | 6              |
| 86 | Sarcoma Cancer Foundation of Canada                  | <a href="http://sarcomacancer.ca">http://sarcomacancer.ca</a>                       |                                                            | 3              |
| 87 | Save Your Skin Foundation                            | <a href="http://www.saveyourskin.ca">www.saveyourskin.ca</a>                        |                                                            | 4              |
| 88 | Scleroderma Society of Canada                        | <a href="http://www.scleroderma.ca">www.scleroderma.ca</a>                          | Name now changed to: Scleroderma Canada                    | 5              |
| 89 | Sjogren's Society of Canada                          | <a href="http://www.sjogrenscanada.org">www.sjogrenscanada.org</a>                  |                                                            | 6              |
| 90 | Soft Bones Canada                                    | <a href="http://www.softbonescanada.ca">www.softbonescanada.ca</a>                  |                                                            | 13             |
| 91 | The Canadian Continence Foundation                   | <a href="http://www.canadiancontinence.ca">www.canadiancontinence.ca</a>            |                                                            | 9              |
| 92 | The Endometriosis Network                            | <a href="https://endometriosisnetwork.com">https://endometriosisnetwork.com</a>     | Name now changed to: The Endometriosis Network Canada      | 4              |
| 93 | The Isaac Foundation                                 | <a href="https://www.theisaacfoundation.com">https://www.theisaacfoundation.com</a> |                                                            | 0              |

|     |                                                    |                                                                               |    |
|-----|----------------------------------------------------|-------------------------------------------------------------------------------|----|
| 94  | Thyroid Cancer Canada                              | <a href="http://www.thyroidcancer.ca">www.thyroidcancer.ca</a>                | 6  |
| 95  | Tourette Syndrome Foundation of Canada             | <a href="https://tourette.ca">https://tourette.ca</a>                         | 14 |
| 96  | Trigeminal Neuralgia Association of Canada         | <a href="http://www.tnac.org">www.tnac.org</a>                                | 1  |
| 97  | Tuberous Sclerosis Canada Sclerose Tubereuse       | <a href="https://www.tscanada.ca">https://www.tscanada.ca</a>                 | 7  |
| 98  | Type 1 Together                                    | <a href="http://www.type1together.ca">www.type1together.ca</a>                | 4  |
| 99  | Wounds Canada (Canadian Association of Wound Care) | <a href="https://www.woundscanada.ca">https://www.woundscanada.ca</a>         | 12 |
| 100 | Young Adult Cancer Canada                          | <a href="https://www.youngadultcancer.ca">https://www.youngadultcancer.ca</a> | 10 |
