# Supplementary material for: National patient groups in Canada and their disclosure of relationships with pharmaceutical companies: a cross-sectional study
Source: PubMed Central journal article supplement — BMJ Open. 2022 Mar 8;12(3):e055287. doi: 10.1136/bmjopen-2021-055287 (PMC8915328; doi:10.1136/bmjopen-2021-055287), 2022-03-08
Supplement: bmjopen-2021-055287supp006.pdf [file bmjopen-2021-055287supp006.pdf]

## Supplementary File 6: Information about revenue and donations on individual patient groups' public websites

| Patient group number ‡ | Total annual revenue | Donations in general                 |                          |                                                                        |                      | Pharmaceutical company donations     |                                                  |                                                                 | Donor information on website |                              |                                |                                           |
|------------------------|----------------------|--------------------------------------|--------------------------|------------------------------------------------------------------------|----------------------|--------------------------------------|--------------------------------------------------|-----------------------------------------------------------------|------------------------------|------------------------------|--------------------------------|-------------------------------------------|
|                        |                      | Dollar range of individual donations | Total value of donations | Breakdown of total donations by source (e.g., corporate, individual s) | Purpose of donations | Number of groups reporting donations | Value of donations from pharmaceutical companies | Percent of total revenue from pharmaceutical company donations* | Any donor logo               | Pharmaceutical company donor | Hyperlink to any donor website | Hyperlink to pharmaceutical company donor |
| 1                      |                      |                                      |                          |                                                                        |                      |                                      |                                                  |                                                                 |                              |                              |                                |                                           |
| 2                      | x                    | x                                    |                          |                                                                        |                      | x                                    |                                                  |                                                                 | x                            | x                            | x                              | x                                         |
| 3                      |                      |                                      |                          |                                                                        |                      | x                                    |                                                  |                                                                 | x                            | x                            |                                |                                           |
| 4                      | x                    |                                      | x                        |                                                                        |                      | x                                    |                                                  |                                                                 | x                            | x                            |                                |                                           |
| 5                      | x                    |                                      | x                        |                                                                        |                      | x                                    |                                                  |                                                                 | x                            | x                            | x                              | x                                         |
| 6                      |                      |                                      |                          |                                                                        |                      |                                      |                                                  |                                                                 |                              |                              |                                |                                           |
| 6                      |                      |                                      |                          |                                                                        |                      | x                                    |                                                  |                                                                 | x                            | x                            | x                              | x                                         |
| 7                      | x                    |                                      | x                        |                                                                        |                      |                                      |                                                  |                                                                 | x                            |                              |                                |                                           |
| 8                      |                      |                                      |                          |                                                                        |                      |                                      |                                                  |                                                                 |                              |                              |                                |                                           |
| 9                      |                      |                                      |                          |                                                                        |                      | x                                    |                                                  |                                                                 | x                            | x                            | x                              | x                                         |
| 10                     |                      |                                      |                          |                                                                        |                      |                                      |                                                  |                                                                 |                              |                              |                                |                                           |
| 11                     | x                    |                                      |                          |                                                                        |                      | x                                    |                                                  |                                                                 | x                            | x                            | x                              | x                                         |
| 12                     | x                    |                                      |                          | x                                                                      |                      |                                      |                                                  |                                                                 |                              |                              |                                |                                           |
| 13                     |                      |                                      |                          |                                                                        |                      |                                      |                                                  |                                                                 |                              |                              |                                |                                           |
| 14                     |                      |                                      |                          |                                                                        |                      | x                                    |                                                  |                                                                 |                              |                              |                                |                                           |
| 15                     | x                    |                                      |                          |                                                                        |                      | x                                    |                                                  |                                                                 |                              |                              |                                |                                           |
| 16                     | x                    |                                      | x                        |                                                                        |                      | x                                    |                                                  |                                                                 | x                            | x                            | x                              | x                                         |
| 17                     |                      |                                      |                          |                                                                        |                      |                                      |                                                  |                                                                 |                              |                              |                                |                                           |
| 18                     |                      |                                      |                          |                                                                        |                      |                                      |                                                  |                                                                 |                              |                              |                                |                                           |
| 19                     |                      |                                      |                          |                                                                        |                      |                                      |                                                  |                                                                 |                              |                              |                                |                                           |

|    |   |   |   |   |   |   |   |   |   |   |   |   |
|----|---|---|---|---|---|---|---|---|---|---|---|---|
| 20 | x |   |   | x |   | x |   |   | x | x | x | x |
| 21 | x |   |   |   |   |   |   |   |   |   |   |   |
| 22 | x |   |   |   |   | x |   |   | x | x |   |   |
| 23 |   |   |   |   | x |   |   |   |   |   | x |   |
| 24 | x | x |   |   |   | x |   |   |   |   |   |   |
| 25 | x |   | x |   |   |   | x | x |   |   | x |   |
| 26 |   |   |   |   |   |   |   |   |   |   |   |   |
| 27 |   |   |   |   |   |   |   |   |   |   |   |   |
| 28 |   |   |   |   |   | x |   |   | x | x | x | x |
| 29 | x |   | x |   |   |   |   |   | x |   | x |   |
| 30 |   |   |   |   |   | x |   |   | x | x | x | x |
| 31 | x |   | x |   |   | x |   |   | x | x |   |   |
| 31 | x |   |   |   |   | x |   |   | x | x |   |   |
| 32 |   |   |   |   |   | x |   |   |   |   |   |   |
| 33 | x |   |   | x |   | x |   |   |   |   | x | x |
| 34 |   |   |   |   |   |   |   |   |   |   |   |   |
| 35 |   |   |   |   |   | x |   |   |   |   |   |   |
| 36 |   |   |   |   |   |   |   |   |   |   |   |   |
| 37 | x |   |   |   |   | x |   |   | x | x | x | x |
| 38 |   |   |   |   |   |   |   |   |   |   |   |   |
| 39 | x |   |   |   |   | x |   |   | x | x | x | x |
| 40 |   | x |   |   |   |   |   |   | x |   | x |   |
| 41 |   |   |   |   |   | x |   |   | x | x |   |   |
| 42 |   |   |   |   |   |   |   |   |   |   | x |   |
| 43 | x |   |   |   |   | x |   |   | x | x | x |   |
| 44 |   |   |   |   |   |   |   |   | x |   |   |   |
| 45 | x |   |   |   |   | x |   |   |   |   |   |   |
| 46 |   |   |   |   |   |   |   |   |   |   |   |   |

|    |   |   |   |   |   |   |  |  |   |   |   |   |
|----|---|---|---|---|---|---|--|--|---|---|---|---|
| 47 |   |   |   |   |   |   |  |  |   |   |   |   |
| 48 | x |   | x |   |   |   |  |  |   |   |   |   |
| 49 | x | x |   |   |   | x |  |  | x | x |   |   |
| 50 | x | x |   |   |   | x |  |  | x | x | x | x |
| 51 | x |   |   | x |   | x |  |  | x | x | x | x |
| 53 |   |   |   |   |   |   |  |  |   |   |   |   |
| 54 | x | x | x | x | x | x |  |  | x | x | x | x |
| 55 |   |   |   |   |   | x |  |  | x | x | x | x |
| 56 |   |   |   |   |   |   |  |  |   |   |   |   |
| 57 | x |   | x |   |   |   |  |  |   |   |   |   |
| 58 |   |   |   |   |   | x |  |  | x | x |   |   |
| 60 |   |   |   |   |   |   |  |  |   |   |   |   |
| 61 | x | x |   |   |   | x |  |  | x | x | x | x |
| 62 | x |   |   | x |   | x |  |  | x |   | x |   |
| 63 |   |   |   |   |   | x |  |  | x | x |   |   |
| 64 | x | x |   |   |   | x |  |  | x |   |   |   |
| 65 |   |   |   |   |   | x |  |  | x | x | x | x |
| 66 |   |   |   |   |   |   |  |  |   |   |   |   |
| 67 |   |   |   |   |   |   |  |  |   |   |   |   |
| 68 |   |   |   |   |   |   |  |  |   |   |   |   |
| 69 |   |   |   |   |   | x |  |  |   |   |   |   |
| 70 | x |   | x |   |   | x |  |  | x | x |   |   |
| 71 | x |   | x | x |   | x |  |  | x | x | x | x |
| 72 | x |   |   |   |   | x |  |  | x | x |   |   |
| 73 |   |   |   |   |   |   |  |  |   |   |   |   |
| 74 | x | x |   |   |   | x |  |  | x | x |   |   |
| 75 | x |   |   |   |   | x |  |  | x | x |   |   |
| 76 | x |   | x |   |   | x |  |  | x | x |   |   |

|              |           |          |           |          |          |           |          |          |           |           |           |           |
|--------------|-----------|----------|-----------|----------|----------|-----------|----------|----------|-----------|-----------|-----------|-----------|
| 77           | x         |          |           |          |          | x         |          |          | x         | x         |           |           |
| 78           | x         |          | x         | x        | x        | x         |          |          | x         |           |           |           |
| 79           |           |          |           |          |          |           |          |          |           |           |           |           |
| 80           |           |          |           |          |          |           |          |          |           |           |           |           |
| 81           | x         |          | x         |          |          |           |          |          |           |           |           |           |
| 82           |           |          |           |          |          | x         |          |          | x         | x         |           |           |
| 83           |           |          |           |          |          |           |          |          | x         |           |           |           |
| 84           |           |          |           |          |          | x         |          |          | x         | x         | x         |           |
| 85           | x         |          |           |          |          |           |          |          |           |           |           |           |
| 86           |           |          |           |          | x        | x         |          |          | x         | x         | x         | x         |
| 87           |           |          |           |          |          | x         |          |          | x         | x         | x         | x         |
| 88           |           |          |           |          |          | x         |          |          | x         | x         |           |           |
| 89           |           |          |           |          |          | x         |          |          | x         |           | x         |           |
| 90           |           |          |           |          |          | x         |          |          | x         | x         | x         | x         |
| 91           |           |          |           |          |          |           |          |          |           |           |           |           |
| 92           |           |          |           |          |          |           |          |          |           |           |           |           |
| 93           | x         |          | x         |          |          |           |          |          | x         |           |           |           |
| 94           |           |          |           |          |          |           |          |          |           |           |           |           |
| 95           | x         |          | x         |          |          |           |          |          |           |           |           |           |
| 96           |           |          |           |          |          | x         |          |          | x         | x         |           |           |
| 97           |           |          |           |          |          |           |          |          |           |           |           |           |
| <b>Total</b> | <b>42</b> | <b>9</b> | <b>17</b> | <b>8</b> | <b>4</b> | <b>53</b> | <b>1</b> | <b>1</b> | <b>51</b> | <b>41</b> | <b>31</b> | <b>20</b> |

‡Patient groups have been anonymized

\*Calculated from information on website
