# Supplementary material for: National patient groups in Canada and their disclosure of relationships with pharmaceutical companies: a cross-sectional study
Source: PubMed Central journal article supplement — BMJ Open. 2022 Mar 8;12(3):e055287. doi: 10.1136/bmjopen-2021-055287 (PMC8915328; doi:10.1136/bmjopen-2021-055287), 2022-03-08
Supplement: bmjopen-2021-055287supp007.pdf [file bmjopen-2021-055287supp007.pdf]

**Supplementary File 7: Information about employment of board and staff on individual patient groups' public websites**

| Patient group number‡ | Board members              |                |           |                                                     |     | Staff                                      |     |
|-----------------------|----------------------------|----------------|-----------|-----------------------------------------------------|-----|--------------------------------------------|-----|
|                       | General employment history |                |           | Pharmaceutical industry employment history reported |     | Pharmaceutical employment history reported |     |
|                       | None*                      | Brief synopsis | Detailed† | No                                                  | Yes | No*                                        | Yes |
| 1                     |                            | x              |           | x                                                   |     | x                                          |     |
| 2                     | x                          |                |           | x                                                   |     | x                                          |     |
| 3                     |                            | x              |           | x                                                   |     | x                                          |     |
| 4                     | x                          |                |           | x                                                   |     | x                                          |     |
| 5                     | x                          |                |           | x                                                   |     | x                                          |     |
| 6                     |                            | x              |           | x                                                   |     | x                                          |     |
| 7                     |                            |                | x         |                                                     | x   | x                                          |     |
| 8                     | x                          |                |           | x                                                   |     | x                                          |     |
| 9                     | x                          |                |           | x                                                   |     | x                                          |     |
| 10                    | x                          |                |           | x                                                   |     | x                                          |     |
| 11                    | x                          |                |           | x                                                   |     | x                                          |     |
| 12                    |                            |                | x         | x                                                   |     | x                                          |     |
| 13                    |                            | x              |           | x                                                   |     | x                                          |     |
| 14                    |                            | x              |           | x                                                   |     | x                                          |     |
| 15                    |                            | x              |           | x                                                   |     | x                                          |     |
| 16                    |                            | x              |           | x                                                   |     | x                                          |     |
| 17                    |                            | x              |           |                                                     | x   | x                                          |     |
| 18                    |                            | x              |           | x                                                   |     | x                                          |     |
| 19                    |                            | x              |           | x                                                   |     | x                                          |     |
| 20                    |                            | x              |           | x                                                   |     | x                                          |     |
| 21                    |                            | x              |           | x                                                   |     | x                                          |     |
| 22                    | x                          |                |           | x                                                   |     | x                                          |     |
| 23                    | x                          |                |           | x                                                   |     | x                                          |     |
| 24                    | x                          |                |           | x                                                   |     | x                                          |     |
| 25                    |                            | x              |           | x                                                   |     | x                                          |     |
| 26                    |                            | x              |           |                                                     | x   | x                                          |     |
| 27                    | x                          |                |           | x                                                   |     | x                                          |     |
| 28                    |                            | x              |           | x                                                   |     | x                                          |     |
| 29                    |                            | x              |           | x                                                   |     | x                                          |     |
| 30                    |                            | x              |           |                                                     | x   | x                                          |     |
| 31                    | x                          |                |           | x                                                   |     | x                                          |     |
| 32                    | x                          |                |           | x                                                   |     | x                                          |     |
| 33                    |                            | x              |           | x                                                   |     |                                            | x   |
| 34                    |                            | x              |           | x                                                   |     | x                                          |     |
| 35                    | x                          |                |           | x                                                   |     | x                                          |     |
| 36                    | x                          |                |           | x                                                   |     | x                                          |     |
| 37                    | x                          |                |           | x                                                   |     | x                                          |     |
| 38                    |                            | x              |           | x                                                   |     | x                                          |     |
| 39                    |                            |                | x         |                                                     | x   | x                                          |     |

|    |   |   |   |   |   |   |   |
|----|---|---|---|---|---|---|---|
| 40 | X |   |   | X |   | X |   |
| 41 |   | X |   |   | X | X |   |
| 42 |   |   | X |   | X |   | X |
| 43 | X |   |   | X |   | X |   |
| 44 |   | X |   |   | X | X |   |
| 45 | X |   |   | X |   | X |   |
| 46 |   | X |   |   | X | X |   |
| 47 | X |   |   | X |   | X |   |
| 48 |   | X |   | X |   | X |   |
| 49 |   | X |   | X |   | X |   |
| 50 | X |   |   | X |   |   | X |
| 51 |   | X |   |   | X | X |   |
| 52 |   | X |   |   | X | X |   |
| 53 | X |   |   | X |   | X |   |
| 54 |   | X |   | X |   | X |   |
| 55 | X |   |   | X |   | X |   |
| 56 | X |   |   | X |   | X |   |
| 57 |   | X |   | X |   | X |   |
| 58 |   | X |   | X |   | X |   |
| 59 |   | X |   | X |   | X |   |
| 60 | X |   |   | X |   | X |   |
| 61 |   | X |   |   | X | X |   |
| 62 | X |   |   | X |   | X |   |
| 63 | X |   |   | X |   | X |   |
| 64 |   | X |   | X |   | X |   |
| 65 | X |   |   | X |   | X |   |
| 66 |   | X |   | X |   | X |   |
| 67 |   |   | X |   | X | X |   |
| 68 |   | X |   | X |   | X |   |
| 69 | X |   |   | X |   | X |   |
| 70 | X |   |   | X |   | X |   |
| 71 |   | X |   |   | X | X |   |
| 72 | X |   |   | X |   | X |   |
| 73 |   | X |   | X |   | X |   |
| 74 |   |   | X | X |   | X |   |
| 75 |   | X |   | X |   |   | X |
| 76 |   | X |   | X |   | X |   |
| 77 |   | X |   | X |   | X |   |
| 78 |   | X |   | X |   | X |   |
| 79 |   | X |   | X |   | X |   |
| 80 | X |   |   | X |   | X |   |
| 81 |   | X |   | X |   | X |   |
| 82 | X |   |   | X |   | X |   |
| 83 |   | X |   | X |   | X |   |
| 84 |   | X |   |   | X | X |   |
| 85 |   | X |   | X |   | X |   |

|              |           |           |          |           |           |           |          |
|--------------|-----------|-----------|----------|-----------|-----------|-----------|----------|
| 86           | x         |           |          | x         |           | x         |          |
| 87           | x         |           |          | x         |           | x         |          |
| 88           |           | x         |          | x         |           | x         |          |
| 89           |           | x         |          | x         |           | x         |          |
| 90           |           | x         |          | x         |           | x         |          |
| 91           |           | x         |          |           | x         | x         |          |
| 92           | x         |           |          | x         |           | x         |          |
| 93           |           | x         |          |           | x         | x         |          |
| 94           | x         |           |          | x         |           | x         |          |
| 95           |           | x         |          | x         |           | x         |          |
| 96           | x         |           |          | x         |           | x         |          |
| 97           |           | x         |          | x         |           | x         |          |
| <b>Total</b> | <b>38</b> | <b>53</b> | <b>6</b> | <b>80</b> | <b>17</b> | <b>93</b> | <b>4</b> |

‡Patient groups have been anonymized

\*Board members (staff) not named or no information about employment history

†For example, year ranges with position, job title, employer
